# Supplementary material for: Face matching and metacognition: investigating individual differences and a training intervention
Source: PeerJ. 2023 Jan 25;11:e14821. doi: 10.7717/peerj.14821 (PMC9884031; doi:10.7717/peerj.14821)
Supplement: Supplemental Information 1 — The data show that the training manipulation failed to improve performance or affect metacognitive ability, and that higher self-assessed and objective abilities predicted better metacognitive performance. [file peerj-11-14821-s001.xlsx]

## Sheet: Training
PID	EFCT pre-training (proportion correct)	EFCT pre-training (d')	EFCT post-training (proportion correct)	EFCT post-training (d')	Training
6694929	0.738095	1.43127	0.738095	1.24425	control
6698317	0.702381	1.45373	0.630952	1.64864	control
6698318	0.785714	2.44499	0.72619	1.57059	control
6698323	0.833333	2.01632	0.72619	1.17758	control
6698346	0.821429	2.23351	0.869048	2.50632	control
6698349	0.869048	2.2457	0.845238	2.08865	control
6698356	0.642857	0.751227	0.642857	0.720004	control
6698374	0.738095	1.32718	0.559524	0.365282	control
6698378	0.654762	0.79635	0.642857	0.855677	control
6698430	0.940476	2.96633	0.880952	2.28695	control
6698472	0.785714	1.67558	0.642857	0.901012	control
6698477	0.607143	0.641124	0.595238	0.554235	control
6698479	0.821429	1.87605	0.77381	1.6127	control
6698550	0.52381	0.417671	0.5		control
6698582	0.5		0.583333	0.434495	control
6698606	0.690476	1.02574	0.678571	1.07801	control
6698628	0.714286	1.11299	0.511905	0.119145	control
6698666	0.5		0.571429	0.385239	control
6698715	0.619048	0.609674	0.488095	-0.0666728	control
6700003	0.678571	0.908564	0.666667	0.84707	control
6700019	0.77381	1.46196	0.809524	1.75691	control
6700025	0.678571	0.916291	0.5		control
6700043	0.714286	1.11299	0.666667	0.841891	control
6701525	0.833333	2.12193	0.821429	2.05526	control
6702514	0.690476	1.13634	0.690476	0.988623	control
6702517	0.619048	0.674175	0.607143	0.614628	control
6702886	0.595238	0.579631	0.5		control
6703649	0.666667	0.868682	0.630952	0.65542	control
6703917	0.702381	1.45373	0.595238	0.877685	control
6703921	0.797619	1.65203	0.654762	0.777307	control
6704015	0.869048	2.50632	0.928571	2.94976	control
6704169	0.535714	0.434244	0.5		control
6704893	0.714286	1.1027	0.77381	1.46196	control
6704922	0.809524	1.80683	0.714286	1.20724	control
6705013	0.666667	0.84707	0.678571	0.944837	control
6705038	0.559524	0.781958	0.559524	0.781958	control
6705278	0.77381	1.51613	0.595238	0.517118	control
6706390	0.77381	1.48819	0.702381	1.05012	control
6706393	0.595238	1.04436	0.535714	0.557931	control
6706415	0.535714	0.873459	0.52381	0.698621	control
6706577	0.690476	1.97348	0.690476	1.27889	control
6712431	0.547619	0.677077	0.607143	1.50015	control
6712457	0.785714	1.62102	0.75	1.38867	control
6712515	0.714286	1.31381	0.630952	0.79613	control
6712634	0.690476	0.988623	0.511905	0.0589294	control
6713017	0.619048	0.701518	0.52381	0.224027	control
6713099	0.714286	1.20724	0.654762	1.21337	control
6713146	0.892857	2.66337	0.904762	2.60204	control
6713975	0.761905	1.49356	0.702381	1.11263	control
6694909	0.714286	1.14568	0.714286	1.1027	control
6698330	0.583333	0.546784	0.630952	0.840618	control
6698335	0.797619	1.74016	0.761905	1.38962	control
6698347	0.547619	0.677077	0.559524	0.633738	control
6698377	0.869048	2.50632	0.809524	1.75691	control
6698470	0.77381	1.46196	0.809524	1.7059	control
6698508	0.678571	0.908564	0.488095	-0.0645834	control
6698554	0.678571	1.03146	0.738095	1.29406	control
6698560	0.654762	1.02016	0.607143	0.950017	control
6698585	0.52381	0.131256	0.630952	1.08591	control
6698593	0.654762	1.21337	0.595238	0.517118	control
6698635	0.607143	1.12052	0.535714	0.434244	control
6698684	0.821429	1.80051	0.797619	1.74016	control
6698906	0.869048	2.2457	0.72619	1.18915	control
6700026	0.678571	0.916291	0.702381	1.08529	control
6700062	0.666667	0.855897	0.678571	0.96681	control
6700063	0.583333	1.33236	0.559524	1.13286	control
6700070	0.690476	0.977784	0.666667	0.908284	control
6700083	0.559524	1.13286	0.619048	1.19285	control
6700085	0.678571	1.13863	0.52381	0.199494	control
6700105	0.559524	0.293656	0.619048	0.620568	control
6700173	0.511905	0.140261	0.535714	0.364288	control
6701371	0.607143	0.674243	0.642857	0.901012	control
6701589	0.642857	0.720004	0.559524	0.303239	control
6702467	0.5		0.440476	-0.303239	control
6702469	0.75	1.3204	0.654762	0.827382	control
6702604	0.666667	0.868682	0.75	1.33463	control
6702688	0.738095	1.37167	0.678571	0.904766	control
6703752	0.75	1.38867	0.630952	0.79613	control
6703955	0.75	1.43206	0.666667	1.01949	control
6704082	0.559524	0.295723	0.75	1.35694	control
6704858	0.785714	2.44499	0.714286	1.17218	control
6704872	0.77381	1.55643	0.738095	1.24425	control
6704908	0.833333	2.29809	0.821429	2.05526	control
6704923	0.880952	2.28695	0.702381	1.33742	control
6704975	0.738095	1.27005	0.535714	0.434244	control
6704999	0.571429	0.429866	0.642857	0.751227	control
6705023	0.690476	1.13634	0.619048	0.620568	control
6705028	0.75	1.49082	0.797619	1.81584	control
6705032	0.642857	0.720004	0.654762	0.849957	control
6705171	0.702381	1.04066	0.666667	0.841891	control
6705205	0.607143	0.674243	0.595238	0.579631	control
6706377	0.738095	1.24425	0.619048	0.609674	control
6706383	0.642857	0.715814	0.583333	0.426348	control
6706392	0.642857	1.03853	0.630952	1.08591	control
6706400	0.547619	0.539126	0.595238	0.704138	control
6706440	0.52381	0.698621	0.547619	0.28438	control
6706445	0.535714	0.175782	0.666667	0.868682	control
6706621	0.595238	1.04436	0.559524	0.324846	control
6707048	0.559524	0.324846	0.607143	0.576048	control
6712441	0.77381	1.47053	0.72619	1.17192	control
6712529	0.535714	0.434244	0.678571	1.21996	control
6712593	0.821429	1.80051	0.833333	2.01632	control
6713031	0.5		0.607143	1.12052	control
6713075	0.595238	1.04436	0.607143	1.12052	control
6713108	0.678571	0.944837	0.72619	1.17758	control
6713123	0.690476	1.00438	0.535714	0.873459	control
6714305	0.607143	0.551348	0.630952	0.840618	control
6694794	0.702381	1.04066	0.583333	0.426348	diagnostic feature
6694941	0.77381	1.51613	0.714286	1.20724	diagnostic feature
6695370	0.738095	1.32718	0.571429	1.23775	diagnostic feature
6698326	0.785714	1.55742	0.571429	0.357216	diagnostic feature
6698366	0.666667	1.27486	0.571429	1.23775	diagnostic feature
6698371	0.702381	1.08529	0.738095	1.27005	diagnostic feature
6698384	0.690476	0.977784	0.654762	1.39333	diagnostic feature
6698390	0.761905	1.4013	0.642857	0.714432	diagnostic feature
6698476	0.678571	1.03146	0.654762	1.10002	diagnostic feature
6698537	0.666667	0.973132	0.809524	2.17063	diagnostic feature
6698559	0.690476	1.00438	0.607143	0.950017	diagnostic feature
6698561	0.690476	1.13634	0.630952	0.79613	diagnostic feature
6698570	0.809524	1.88042	0.714286	1.17218	diagnostic feature
6698641	0.809524	1.7059	0.785714	1.58281	diagnostic feature
6698731	0.738095	1.29406	0.809524	1.75691	diagnostic feature
6698742	0.619048	0.595874	0.702381	1.03602	diagnostic feature
6698762	0.77381	1.48819	0.559524	0.335685	diagnostic feature
6700000	0.595238	1.41925	0.583333	1.33236	diagnostic feature
6700035	0.583333	0.96346	0.571429	1.23775	diagnostic feature
6700055	0.619048	0.735736	0.595238	0.611368	diagnostic feature
6700067	0.678571	0.904766	0.702381	1.19467	diagnostic feature
6700122	0.678571	1.91199	0.52381	0.698621	diagnostic feature
6700415	0.5		0.5		diagnostic feature
6701373	0.52381	0.121887	0.583333	0.412575	diagnostic feature
6702458	0.904762	2.53209	0.880952	2.58247	diagnostic feature
6702465	0.690476	1.08979	0.630952	0.733105	diagnostic feature
6702476	0.821429	2.23351	0.821429	1.87605	diagnostic feature
6703045	0.690476	0.971439	0.833333	1.9054	diagnostic feature
6703937	0.607143	0.641124	0.52381	0.181502	diagnostic feature
6703944	0.690476	0.988623	0.583333	0.412575	diagnostic feature
6704860	0.583333	0.420092	0.535714	0.175179	diagnostic feature
6704865	0.77381	1.47053	0.714286	1.14568	diagnostic feature
6704894	0.72619	1.18915	0.5		diagnostic feature
6704907	0.904762	2.53209	0.702381	1.25549	diagnostic feature
6704931	0.630952	0.733105	0.607143	0.543002	diagnostic feature
6705021	0.583333	0.420092	0.595238	0.484675	diagnostic feature
6705207	0.702381	1.08529	0.785714	1.53811	diagnostic feature
6705316	0.702381	1.63764	0.714286	1.25319	diagnostic feature
6706394	0.702381	1.04066	0.630952	0.6682	diagnostic feature
6706398	0.666667	1.0797	0.666667	0.908284	diagnostic feature
6706399	0.583333	0.492741	0.619048	0.779125	diagnostic feature
6706438	0.72619	1.18915	0.642857	1.03853	diagnostic feature
6706527	0.75	1.43206	0.714286	1.69656	diagnostic feature
6706572	0.714286	1.10524	0.738095	1.32718	diagnostic feature
6712445	0.607143	0.716249	0.547619	0.539126	diagnostic feature
6712597	0.738095	1.37167	0.666667	0.973132	diagnostic feature
6712647	0.690476	1.97348	0.559524	0.781958	diagnostic feature
6713030	0.75	1.31347	0.72619	1.31212	diagnostic feature
6713102	0.869048	2.1678	0.714286	1.12627	diagnostic feature
6714029	0.892857	2.50743	0.869048	2.19233	diagnostic feature
6714488	0.619048	0.634574	0.654762	0.914606	diagnostic feature
6694935	0.607143	0.576048	0.583333	0.415543	diagnostic feature
6698328	0.571429	0.562586	0.619048	0.835395	diagnostic feature
6698329	0.880952	2.42054	0.904762	2.60204	diagnostic feature
6698385	0.833333	1.94839	0.904762	2.53209	diagnostic feature
6698440	0.785714	1.58281	0.690476	1.08979	diagnostic feature
6698454	0.785714	2.44499	0.845238	2.02454	diagnostic feature
6698467	0.559524	0.385499	0.5		diagnostic feature
6698478	0.833333	1.94839	0.77381	1.46196	diagnostic feature
6698489	0.535714	0.181434	0.702381	1.06478	diagnostic feature
6698584	0.619048	0.634574	0.738095	1.32718	diagnostic feature
6698588	0.654762	0.87852	0.690476	1.13634	diagnostic feature
6698589	0.690476	1.19716	0.690476	1.3948	diagnostic feature
6698646	0.607143	0.562242	0.607143	0.576048	diagnostic feature
6698648	0.678571	0.928229	0.797619	1.65203	diagnostic feature
6698692	0.583333	0.426348	0.619048	0.620568	diagnostic feature
6698730	0.690476	0.988623	0.595238	0.484675	diagnostic feature
6698751	0.690476	1.02574	0.642857	0.715814	diagnostic feature
6700023	0.702381	1.25549	0.607143	0.562242	diagnostic feature
6700037	0.630952	0.840618	0.690476	1.02574	diagnostic feature
6700039	0.642857	0.855677	0.666667	1.01949	diagnostic feature
6700053	0.52381	0.117455	0.595238	0.579631	diagnostic feature
6700064	0.559524	1.13286	0.547619	1.01372	diagnostic feature
6700076	0.690476	1.00438	0.666667	0.908284	diagnostic feature
6700121	0.583333	0.80153	0.559524	1.13286	diagnostic feature
6700345	0.547619	0.405529	0.583333	0.80153	diagnostic feature
6702457	0.583333	0.80153	0.571429	0.720628	diagnostic feature
6702481	0.607143	1.50015	0.52381	0.259406	diagnostic feature
6702502	0.75	1.57153	0.607143	0.844399	diagnostic feature
6702560	0.642857	0.959763	0.702381	1.08529	diagnostic feature
6703865	0.595238	0.651666	0.678571	0.928229	diagnostic feature
6703960	0.595238	0.474069	0.666667	0.868682	diagnostic feature
6704097	0.630952	0.89827	0.583333	0.584993	diagnostic feature
6704202	0.678571	0.928229	0.607143	0.593273	diagnostic feature
6704874	0.821429	1.7868	0.833333	1.94839	diagnostic feature
6704888	0.678571	1.03146	0.738095	1.62891	diagnostic feature
6704900	0.642857	1.03853	0.642857	0.751227	diagnostic feature
6704915	0.607143	0.593273	0.619048	0.609674	diagnostic feature
6704988	0.880952	2.33259	0.880952	2.28695	diagnostic feature
6705015	0.75	1.33463	0.678571	0.944837	diagnostic feature
6705016	0.654762	0.79635	0.809524	1.72436	diagnostic feature
6705018	0.619048	0.634574	0.678571	0.96681	diagnostic feature
6705199	0.785714	1.58281	0.797619	1.61901	diagnostic feature
6705232	0.607143	0.562242	0.678571	1.13863	diagnostic feature
6706370	0.654762	0.777307	0.714286	1.11299	diagnostic feature
6706380	0.654762	1.10002	0.547619	0.338559	diagnostic feature
6706384	0.52381	0.698621	0.535714	0.434244	diagnostic feature
6706385	0.547619	0.405529	0.547619	0.4589	diagnostic feature
6706449	0.607143	0.641124	0.690476	1.3948	diagnostic feature
6706762	0.619048	1.19285	0.690476	1.57809	diagnostic feature
6706803	0.761905	1.45155	0.702381	1.06478	diagnostic feature
6708204	0.702381	1.04066	0.654762	0.827382	diagnostic feature
6712434	0.547619	0.677077	0.583333	1.33236	diagnostic feature
6712511	0.761905	1.3858	0.821429	2.23351	diagnostic feature
6712599	0.630952	0.840618	0.5		diagnostic feature
6713021	0.714286	2.09342	0.738095	2.21088	diagnostic feature
6713023	0.535714	0.873459	0.535714	0.873459	diagnostic feature
6713091	0.761905	1.3858	0.77381	1.46196	diagnostic feature
6713107	0.738095	1.62891	0.797619	1.65203	diagnostic feature
6713126	0.72619	1.17758	0.666667	0.885908	diagnostic feature
6714091	0.797619	1.62975	0.72619	1.23257	diagnostic feature
6714246	0.690476	1.08979	0.678571	0.96681	diagnostic feature
6714473	0.583333	0.412575	0.583333	0.457571	diagnostic feature

## Sheet: Training and metacognition
PID	Test	Training	Trial number	Trial accuracy	Trial confidence
6694794	post-training	diagnostic feature	85	0	2
6694794	post-training	diagnostic feature	86	1	4
6694794	post-training	diagnostic feature	87	1	4
6694794	post-training	diagnostic feature	88	0	4
6694794	post-training	diagnostic feature	89	1	3
6694794	post-training	diagnostic feature	90	1	4
6694794	post-training	diagnostic feature	91	0	3
6694794	post-training	diagnostic feature	92	1	3
6694794	post-training	diagnostic feature	93	1	5
6694794	post-training	diagnostic feature	94	1	4
6694794	post-training	diagnostic feature	95	1	5
6694794	post-training	diagnostic feature	96	1	5
6694794	post-training	diagnostic feature	97	1	4
6694794	post-training	diagnostic feature	98	1	3
6694794	post-training	diagnostic feature	99	1	3
6694794	post-training	diagnostic feature	100	1	2
6694794	post-training	diagnostic feature	101	1	4
6694794	post-training	diagnostic feature	102	1	4
6694794	post-training	diagnostic feature	103	0	4
6694794	post-training	diagnostic feature	104	0	3
6694794	post-training	diagnostic feature	105	0	3
6694794	post-training	diagnostic feature	106	0	3
6694794	post-training	diagnostic feature	107	0	4
6694794	post-training	diagnostic feature	108	0	3
6694794	post-training	diagnostic feature	109	1	2
6694794	post-training	diagnostic feature	110	1	4
6694794	post-training	diagnostic feature	111	1	4
6694794	post-training	diagnostic feature	112	1	4
6694794	post-training	diagnostic feature	113	1	5
6694794	post-training	diagnostic feature	114	0	3
6694794	post-training	diagnostic feature	115	1	3
6694794	post-training	diagnostic feature	116	0	3
6694794	post-training	diagnostic feature	117	0	3
6694794	post-training	diagnostic feature	118	1	3
6694794	post-training	diagnostic feature	119	1	4
6694794	post-training	diagnostic feature	120	1	3
6694794	post-training	diagnostic feature	121	1	3
6694794	post-training	diagnostic feature	122	1	4
6694794	post-training	diagnostic feature	123	1	2
6694794	post-training	diagnostic feature	124	0	4
6694794	post-training	diagnostic feature	125	1	3
6694794	post-training	diagnostic feature	126	1	3
6694794	post-training	diagnostic feature	127	0	4
6694794	post-training	diagnostic feature	128	1	3
6694794	post-training	diagnostic feature	129	0	0
6694794	post-training	diagnostic feature	130	1	2
6694794	post-training	diagnostic feature	131	1	3
6694794	post-training	diagnostic feature	132	1	3
6694794	post-training	diagnostic feature	133	1	3
6694794	post-training	diagnostic feature	134	0	2
6694794	post-training	diagnostic feature	135	0	4
6694794	post-training	diagnostic feature	136	0	5
6694794	post-training	diagnostic feature	137	0	3
6694794	post-training	diagnostic feature	138	1	3
6694794	post-training	diagnostic feature	139	1	4
6694794	post-training	diagnostic feature	140	0	3
6694794	post-training	diagnostic feature	141	0	4
6694794	post-training	diagnostic feature	142	1	2
6694794	post-training	diagnostic feature	143	0	4
6694794	post-training	diagnostic feature	144	0	3
6694794	post-training	diagnostic feature	145	1	2
6694794	post-training	diagnostic feature	146	0	4
6694794	post-training	diagnostic feature	147	0	3
6694794	post-training	diagnostic feature	148	1	3
6694794	post-training	diagnostic feature	149	1	3
6694794	post-training	diagnostic feature	150	1	4
6694794	post-training	diagnostic feature	151	0	4
6694794	post-training	diagnostic feature	152	0	4
6694794	post-training	diagnostic feature	153	0	3
6694794	post-training	diagnostic feature	154	1	3
6694794	post-training	diagnostic feature	155	0	4
6694794	post-training	diagnostic feature	156	0	2
6694794	post-training	diagnostic feature	157	0	3
6694794	post-training	diagnostic feature	158	1	3
6694794	post-training	diagnostic feature	159	1	4
6694794	post-training	diagnostic feature	160	1	3
6694794	post-training	diagnostic feature	161	1	3
6694794	post-training	diagnostic feature	162	0	4
6694794	post-training	diagnostic feature	163	0	3
6694794	post-training	diagnostic feature	164	0	3
6694794	post-training	diagnostic feature	165	1	4
6694794	post-training	diagnostic feature	166	1	3
6694794	post-training	diagnostic feature	167	0	4
6694794	post-training	diagnostic feature	168	1	4
6694794	pre-training	diagnostic feature	1	1	4
6694794	pre-training	diagnostic feature	2	1	3
6694794	pre-training	diagnostic feature	3	1	3
6694794	pre-training	diagnostic feature	4	1	3
6694794	pre-training	diagnostic feature	5	0	3
6694794	pre-training	diagnostic feature	6	1	4
6694794	pre-training	diagnostic feature	7	1	3
6694794	pre-training	diagnostic feature	8	1	3
6694794	pre-training	diagnostic feature	9	1	5
6694794	pre-training	diagnostic feature	10	1	4
6694794	pre-training	diagnostic feature	11	1	3
6694794	pre-training	diagnostic feature	12	1	4
6694794	pre-training	diagnostic feature	13	1	3
6694794	pre-training	diagnostic feature	14	1	3
6694794	pre-training	diagnostic feature	15	1	4
6694794	pre-training	diagnostic feature	16	0	3
6694794	pre-training	diagnostic feature	17	1	4
6694794	pre-training	diagnostic feature	18	0	3
6694794	pre-training	diagnostic feature	19	0	2
6694794	pre-training	diagnostic feature	20	1	4
6694794	pre-training	diagnostic feature	21	0	4
6694794	pre-training	diagnostic feature	22	0	4
6694794	pre-training	diagnostic feature	23	1	3
6694794	pre-training	diagnostic feature	24	0	3
6694794	pre-training	diagnostic feature	25	0	3
6694794	pre-training	diagnostic feature	26	1	4
6694794	pre-training	diagnostic feature	27	1	4
6694794	pre-training	diagnostic feature	28	1	4
6694794	pre-training	diagnostic feature	29	1	4
6694794	pre-training	diagnostic feature	30	1	4
6694794	pre-training	diagnostic feature	31	0	3
6694794	pre-training	diagnostic feature	32	1	3
6694794	pre-training	diagnostic feature	33	1	3
6694794	pre-training	diagnostic feature	34	0	3
6694794	pre-training	diagnostic feature	35	1	3
6694794	pre-training	diagnostic feature	36	1	3
6694794	pre-training	diagnostic feature	37	1	4
6694794	pre-training	diagnostic feature	38	1	4
6694794	pre-training	diagnostic feature	39	1	3
6694794	pre-training	diagnostic feature	40	0	3
6694794	pre-training	diagnostic feature	41	1	4
6694794	pre-training	diagnostic feature	42	1	2
6694794	pre-training	diagnostic feature	43	0	4
6694794	pre-training	diagnostic feature	44	0	4
6694794	pre-training	diagnostic feature	45	1	3
6694794	pre-training	diagnostic feature	46	0	4
6694794	pre-training	diagnostic feature	47	1	4
6694794	pre-training	diagnostic feature	48	1	3
6694794	pre-training	diagnostic feature	49	1	4
6694794	pre-training	diagnostic feature	50	0	4
6694794	pre-training	diagnostic feature	51	1	3
6694794	pre-training	diagnostic feature	52	1	3
6694794	pre-training	diagnostic feature	53	1	3
6694794	pre-training	diagnostic feature	54	1	2
6694794	pre-training	diagnostic feature	55	0	4
6694794	pre-training	diagnostic feature	56	1	4
6694794	pre-training	diagnostic feature	57	1	4
6694794	pre-training	diagnostic feature	58	0	4
6694794	pre-training	diagnostic feature	59	1	4
6694794	pre-training	diagnostic feature	60	1	4
6694794	pre-training	diagnostic feature	61	0	4
6694794	pre-training	diagnostic feature	62	0	4
6694794	pre-training	diagnostic feature	63	0	3
6694794	pre-training	diagnostic feature	64	1	3
6694794	pre-training	diagnostic feature	65	1	2
6694794	pre-training	diagnostic feature	66	1	3
6694794	pre-training	diagnostic feature	67	1	4
6694794	pre-training	diagnostic feature	68	1	3
6694794	pre-training	diagnostic feature	69	1	4
6694794	pre-training	diagnostic feature	70	1	4
6694794	pre-training	diagnostic feature	71	1	3
6694794	pre-training	diagnostic feature	72	1	3
6694794	pre-training	diagnostic feature	73	1	4
6694794	pre-training	diagnostic feature	74	0	3
6694794	pre-training	diagnostic feature	75	1	3
6694794	pre-training	diagnostic feature	76	1	4
6694794	pre-training	diagnostic feature	77	1	3
6694794	pre-training	diagnostic feature	78	0	3
6694794	pre-training	diagnostic feature	79	0	3
6694794	pre-training	diagnostic feature	80	1	4
6694794	pre-training	diagnostic feature	81	0	4
6694794	pre-training	diagnostic feature	82	1	3
6694794	pre-training	diagnostic feature	83	1	3
6694794	pre-training	diagnostic feature	84	0	3
6694909	post-training	control	1	1	2
6694909	post-training	control	2	1	2
6694909	post-training	control	3	1	4
6694909	post-training	control	4	0	3
6694909	post-training	control	5	0	4
6694909	post-training	control	6	0	3
6694909	post-training	control	7	1	4
6694909	post-training	control	8	1	3
6694909	post-training	control	9	1	5
6694909	post-training	control	10	0	3
6694909	post-training	control	11	1	4
6694909	post-training	control	12	1	3
6694909	post-training	control	13	0	5
6694909	post-training	control	14	1	3
6694909	post-training	control	15	1	4
6694909	post-training	control	16	1	4
6694909	post-training	control	17	1	4
6694909	post-training	control	18	0	3
6694909	post-training	control	19	1	4
6694909	post-training	control	20	1	4
6694909	post-training	control	21	0	1
6694909	post-training	control	22	0	4
6694909	post-training	control	23	1	3
6694909	post-training	control	24	1	3
6694909	post-training	control	25	0	4
6694909	post-training	control	26	1	3
6694909	post-training	control	27	1	2
6694909	post-training	control	28	1	4
6694909	post-training	control	29	1	3
6694909	post-training	control	30	1	3
6694909	post-training	control	31	1	2
6694909	post-training	control	32	1	3
6694909	post-training	control	33	0	3
6694909	post-training	control	34	1	3
6694909	post-training	control	35	1	4
6694909	post-training	control	36	0	2
6694909	post-training	control	37	1	4
6694909	post-training	control	38	1	4
6694909	post-training	control	39	1	3
6694909	post-training	control	40	1	4
6694909	post-training	control	41	0	1
6694909	post-training	control	42	1	3
6694909	post-training	control	43	0	5
6694909	post-training	control	44	1	2
6694909	post-training	control	45	1	2
6694909	post-training	control	46	1	4
6694909	post-training	control	47	1	2
6694909	post-training	control	48	1	4
6694909	post-training	control	49	1	4
6694909	post-training	control	50	1	4
6694909	post-training	control	51	1	3
6694909	post-training	control	52	0	4
6694909	post-training	control	53	0	3
6694909	post-training	control	54	1	4
6694909	post-training	control	55	0	3
6694909	post-training	control	56	1	2
6694909	post-training	control	57	1	3
6694909	post-training	control	58	1	4
6694909	post-training	control	59	1	3
6694909	post-training	control	60	1	4
6694909	post-training	control	61	1	3
6694909	post-training	control	62	1	3
6694909	post-training	control	63	0	3
6694909	post-training	control	64	1	4
6694909	post-training	control	65	1	2
6694909	post-training	control	66	1	3
6694909	post-training	control	67	0	1
6694909	post-training	control	68	1	4
6694909	post-training	control	69	1	2
6694909	post-training	control	70	0	3
6694909	post-training	control	71	1	3
6694909	post-training	control	72	1	5
6694909	post-training	control	73	1	3
6694909	post-training	control	74	0	4
6694909	post-training	control	75	0	1
6694909	post-training	control	76	1	1
6694909	post-training	control	77	1	4
6694909	post-training	control	78	1	1
6694909	post-training	control	79	0	2
6694909	post-training	control	80	1	2
6694909	post-training	control	81	1	3
6694909	post-training	control	82	0	3
6694909	post-training	control	83	0	3
6694909	post-training	control	84	1	4
6694909	pre-training	control	85	0	4
6694909	pre-training	control	86	1	4
6694909	pre-training	control	87	1	4
6694909	pre-training	control	88	1	2
6694909	pre-training	control	89	1	3
6694909	pre-training	control	90	1	4
6694909	pre-training	control	91	0	2
6694909	pre-training	control	92	1	4
6694909	pre-training	control	93	0	3
6694909	pre-training	control	94	1	4
6694909	pre-training	control	95	1	4
6694909	pre-training	control	96	0	3
6694909	pre-training	control	97	0	4
6694909	pre-training	control	98	1	4
6694909	pre-training	control	99	1	4
6694909	pre-training	control	100	1	1
6694909	pre-training	control	101	1	3
6694909	pre-training	control	102	1	3
6694909	pre-training	control	103	0	3
6694909	pre-training	control	104	0	2
6694909	pre-training	control	105	1	3
6694909	pre-training	control	106	1	2
6694909	pre-training	control	107	0	5
6694909	pre-training	control	108	1	3
6694909	pre-training	control	109	0	3
6694909	pre-training	control	110	0	3
6694909	pre-training	control	111	1	4
6694909	pre-training	control	112	0	3
6694909	pre-training	control	113	1	2
6694909	pre-training	control	114	1	4
6694909	pre-training	control	115	0	4
6694909	pre-training	control	116	0	4
6694909	pre-training	control	117	0	5
6694909	pre-training	control	118	1	4
6694909	pre-training	control	119	1	4
6694909	pre-training	control	120	1	4
6694909	pre-training	control	121	1	2
6694909	pre-training	control	122	1	2
6694909	pre-training	control	123	1	1
6694909	pre-training	control	124	0	5
6694909	pre-training	control	125	0	4
6694909	pre-training	control	126	1	4
6694909	pre-training	control	127	1	2
6694909	pre-training	control	128	1	2
6694909	pre-training	control	129	1	4
6694909	pre-training	control	130	0	4
6694909	pre-training	control	131	1	3
6694909	pre-training	control	132	0	1
6694909	pre-training	control	133	1	3
6694909	pre-training	control	134	0	3
6694909	pre-training	control	135	1	3
6694909	pre-training	control	136	1	3
6694909	pre-training	control	137	1	1
6694909	pre-training	control	138	1	2
6694909	pre-training	control	139	1	3
6694909	pre-training	control	140	1	4
6694909	pre-training	control	141	1	4
6694909	pre-training	control	142	1	3
6694909	pre-training	control	143	0	3
6694909	pre-training	control	144	1	4
6694909	pre-training	control	145	1	4
6694909	pre-training	control	146	1	4
6694909	pre-training	control	147	1	3
6694909	pre-training	control	148	1	3
6694909	pre-training	control	149	0	4
6694909	pre-training	control	150	1	3
6694909	pre-training	control	151	1	4
6694909	pre-training	control	152	1	2
6694909	pre-training	control	153	1	4
6694909	pre-training	control	154	1	4
6694909	pre-training	control	155	0	1
6694909	pre-training	control	156	1	2
6694909	pre-training	control	157	1	3
6694909	pre-training	control	158	1	4
6694909	pre-training	control	159	0	2
6694909	pre-training	control	160	1	4
6694909	pre-training	control	161	1	3
6694909	pre-training	control	162	1	5
6694909	pre-training	control	163	1	3
6694909	pre-training	control	164	1	4
6694909	pre-training	control	165	1	4
6694909	pre-training	control	166	1	5
6694909	pre-training	control	167	0	3
6694909	pre-training	control	168	1	3
6694929	post-training	control	85	1	2
6694929	post-training	control	86	1	4
6694929	post-training	control	87	1	4
6694929	post-training	control	88	0	4
6694929	post-training	control	89	1	1
6694929	post-training	control	90	1	4
6694929	post-training	control	91	1	4
6694929	post-training	control	92	1	3
6694929	post-training	control	93	1	3
6694929	post-training	control	94	0	1
6694929	post-training	control	95	1	3
6694929	post-training	control	96	1	4
6694929	post-training	control	97	1	2
6694929	post-training	control	98	1	4
6694929	post-training	control	99	0	1
6694929	post-training	control	100	1	4
6694929	post-training	control	101	1	4
6694929	post-training	control	102	1	4
6694929	post-training	control	103	0	4
6694929	post-training	control	104	1	1
6694929	post-training	control	105	1	4
6694929	post-training	control	106	1	1
6694929	post-training	control	107	0	4
6694929	post-training	control	108	0	4
6694929	post-training	control	109	0	3
6694929	post-training	control	110	1	4
6694929	post-training	control	111	0	3
6694929	post-training	control	112	1	3
6694929	post-training	control	113	1	2
6694929	post-training	control	114	1	4
6694929	post-training	control	115	1	3
6694929	post-training	control	116	1	4
6694929	post-training	control	117	1	4
6694929	post-training	control	118	0	3
6694929	post-training	control	119	1	2
6694929	post-training	control	120	1	4
6694929	post-training	control	121	1	5
6694929	post-training	control	122	1	4
6694929	post-training	control	123	1	4
6694929	post-training	control	124	0	2
6694929	post-training	control	125	0	2
6694929	post-training	control	126	0	2
6694929	post-training	control	127	0	3
6694929	post-training	control	128	1	5
6694929	post-training	control	129	1	4
6694929	post-training	control	130	0	3
6694929	post-training	control	131	1	4
6694929	post-training	control	132	0	3
6694929	post-training	control	133	1	4
6694929	post-training	control	134	0	1
6694929	post-training	control	135	1	3
6694929	post-training	control	136	1	1
6694929	post-training	control	137	1	3
6694929	post-training	control	138	1	2
6694929	post-training	control	139	1	2
6694929	post-training	control	140	1	4
6694929	post-training	control	141	1	2
6694929	post-training	control	142	1	4
6694929	post-training	control	143	0	4
6694929	post-training	control	144	1	1
6694929	post-training	control	145	1	4
6694929	post-training	control	146	1	4
6694929	post-training	control	147	1	4
6694929	post-training	control	148	1	2
6694929	post-training	control	149	1	4
6694929	post-training	control	150	1	1
6694929	post-training	control	151	1	1
6694929	post-training	control	152	0	1
6694929	post-training	control	153	1	3
6694929	post-training	control	154	1	1
6694929	post-training	control	155	0	4
6694929	post-training	control	156	1	4
6694929	post-training	control	157	1	3
6694929	post-training	control	158	1	1
6694929	post-training	control	159	1	4
6694929	post-training	control	160	1	2
6694929	post-training	control	161	0	3
6694929	post-training	control	162	1	2
6694929	post-training	control	163	1	4
6694929	post-training	control	164	0	1
6694929	post-training	control	165	1	2
6694929	post-training	control	166	1	4
6694929	post-training	control	167	0	3
6694929	post-training	control	168	1	4
6694929	pre-training	control	1	1	5
6694929	pre-training	control	2	0	4
6694929	pre-training	control	3	1	4
6694929	pre-training	control	4	0	5
6694929	pre-training	control	5	0	2
6694929	pre-training	control	6	1	0
6694929	pre-training	control	7	1	1
6694929	pre-training	control	8	1	3
6694929	pre-training	control	9	0	1
6694929	pre-training	control	10	1	4
6694929	pre-training	control	11	0	4
6694929	pre-training	control	12	1	4
6694929	pre-training	control	13	1	3
6694929	pre-training	control	14	0	4
6694929	pre-training	control	15	0	4
6694929	pre-training	control	16	1	4
6694929	pre-training	control	17	1	4
6694929	pre-training	control	18	0	4
6694929	pre-training	control	19	1	4
6694929	pre-training	control	20	1	4
6694929	pre-training	control	21	0	3
6694929	pre-training	control	22	0	4
6694929	pre-training	control	23	0	4
6694929	pre-training	control	24	1	3
6694929	pre-training	control	25	0	4
6694929	pre-training	control	26	1	2
6694929	pre-training	control	27	0	1
6694929	pre-training	control	28	0	5
6694929	pre-training	control	29	0	2
6694929	pre-training	control	30	1	4
6694929	pre-training	control	31	0	3
6694929	pre-training	control	32	1	4
6694929	pre-training	control	33	1	1
6694929	pre-training	control	34	0	4
6694929	pre-training	control	35	1	2
6694929	pre-training	control	36	1	4
6694929	pre-training	control	37	1	4
6694929	pre-training	control	38	1	4
6694929	pre-training	control	39	1	3
6694929	pre-training	control	40	1	4
6694929	pre-training	control	41	1	4
6694929	pre-training	control	42	0	2
6694929	pre-training	control	43	1	3
6694929	pre-training	control	44	1	3
6694929	pre-training	control	45	1	4
6694929	pre-training	control	46	0	3
6694929	pre-training	control	47	1	2
6694929	pre-training	control	48	1	4
6694929	pre-training	control	49	1	3
6694929	pre-training	control	50	1	5
6694929	pre-training	control	51	1	0
6694929	pre-training	control	52	1	4
6694929	pre-training	control	53	1	3
6694929	pre-training	control	54	1	3
6694929	pre-training	control	55	1	1
6694929	pre-training	control	56	1	5
6694929	pre-training	control	57	0	3
6694929	pre-training	control	58	1	1
6694929	pre-training	control	59	1	4
6694929	pre-training	control	60	1	4
6694929	pre-training	control	61	1	1
6694929	pre-training	control	62	1	4
6694929	pre-training	control	63	0	1
6694929	pre-training	control	64	1	5
6694929	pre-training	control	65	1	4
6694929	pre-training	control	66	0	3
6694929	pre-training	control	67	1	4
6694929	pre-training	control	68	1	1
6694929	pre-training	control	69	1	4
6694929	pre-training	control	70	1	1
6694929	pre-training	control	71	1	3
6694929	pre-training	control	72	1	5
6694929	pre-training	control	73	1	4
6694929	pre-training	control	74	1	4
6694929	pre-training	control	75	1	5
6694929	pre-training	control	76	1	4
6694929	pre-training	control	77	1	5
6694929	pre-training	control	78	1	5
6694929	pre-training	control	79	1	4
6694929	pre-training	control	80	1	4
6694929	pre-training	control	81	1	4
6694929	pre-training	control	82	1	5
6694929	pre-training	control	83	1	4
6694929	pre-training	control	84	1	5
6694935	post-training	diagnostic feature	1	1	4
6694935	post-training	diagnostic feature	2	1	4
6694935	post-training	diagnostic feature	3	1	4
6694935	post-training	diagnostic feature	4	0	4
6694935	post-training	diagnostic feature	5	0	4
6694935	post-training	diagnostic feature	6	0	4
6694935	post-training	diagnostic feature	7	0	3
6694935	post-training	diagnostic feature	8	1	4
6694935	post-training	diagnostic feature	9	1	4
6694935	post-training	diagnostic feature	10	1	5
6694935	post-training	diagnostic feature	11	0	3
6694935	post-training	diagnostic feature	12	1	4
6694935	post-training	diagnostic feature	13	0	5
6694935	post-training	diagnostic feature	14	1	5
6694935	post-training	diagnostic feature	15	0	4
6694935	post-training	diagnostic feature	16	1	4
6694935	post-training	diagnostic feature	17	1	5
6694935	post-training	diagnostic feature	18	0	4
6694935	post-training	diagnostic feature	19	1	4
6694935	post-training	diagnostic feature	20	1	4
6694935	post-training	diagnostic feature	21	0	4
6694935	post-training	diagnostic feature	22	1	4
6694935	post-training	diagnostic feature	23	0	2
6694935	post-training	diagnostic feature	24	1	4
6694935	post-training	diagnostic feature	25	1	4
6694935	post-training	diagnostic feature	26	0	3
6694935	post-training	diagnostic feature	27	1	5
6694935	post-training	diagnostic feature	28	1	4
6694935	post-training	diagnostic feature	29	1	4
6694935	post-training	diagnostic feature	30	0	4
6694935	post-training	diagnostic feature	31	1	4
6694935	post-training	diagnostic feature	32	1	4
6694935	post-training	diagnostic feature	33	0	5
6694935	post-training	diagnostic feature	34	1	4
6694935	post-training	diagnostic feature	35	0	4
6694935	post-training	diagnostic feature	36	1	4
6694935	post-training	diagnostic feature	37	1	3
6694935	post-training	diagnostic feature	38	1	4
6694935	post-training	diagnostic feature	39	0	3
6694935	post-training	diagnostic feature	40	1	4
6694935	post-training	diagnostic feature	41	1	5
6694935	post-training	diagnostic feature	42	1	5
6694935	post-training	diagnostic feature	43	0	4
6694935	post-training	diagnostic feature	44	1	5
6694935	post-training	diagnostic feature	45	1	4
6694935	post-training	diagnostic feature	46	0	0
6694935	post-training	diagnostic feature	47	1	3
6694935	post-training	diagnostic feature	48	0	4
6694935	post-training	diagnostic feature	49	1	4
6694935	post-training	diagnostic feature	50	0	4
6694935	post-training	diagnostic feature	51	1	4
6694935	post-training	diagnostic feature	52	1	4
6694935	post-training	diagnostic feature	53	0	4
6694935	post-training	diagnostic feature	54	0	4
6694935	post-training	diagnostic feature	55	0	4
6694935	post-training	diagnostic feature	56	1	5
6694935	post-training	diagnostic feature	57	1	3
6694935	post-training	diagnostic feature	58	1	4
6694935	post-training	diagnostic feature	59	0	4
6694935	post-training	diagnostic feature	60	1	4
6694935	post-training	diagnostic feature	61	1	4
6694935	post-training	diagnostic feature	62	1	4
6694935	post-training	diagnostic feature	63	0	5
6694935	post-training	diagnostic feature	64	1	4
6694935	post-training	diagnostic feature	65	0	4
6694935	post-training	diagnostic feature	66	1	4
6694935	post-training	diagnostic feature	67	0	4
6694935	post-training	diagnostic feature	68	1	4
6694935	post-training	diagnostic feature	69	1	4
6694935	post-training	diagnostic feature	70	0	4
6694935	post-training	diagnostic feature	71	1	5
6694935	post-training	diagnostic feature	72	1	4
6694935	post-training	diagnostic feature	73	1	4
6694935	post-training	diagnostic feature	74	1	4
6694935	post-training	diagnostic feature	75	1	4
6694935	post-training	diagnostic feature	76	0	4
6694935	post-training	diagnostic feature	77	1	4
6694935	post-training	diagnostic feature	78	0	4
6694935	post-training	diagnostic feature	79	0	4
6694935	post-training	diagnostic feature	80	0	4
6694935	post-training	diagnostic feature	81	0	4
6694935	post-training	diagnostic feature	82	0	4
6694935	post-training	diagnostic feature	83	0	4
6694935	post-training	diagnostic feature	84	0	4
6694935	pre-training	diagnostic feature	85	1	4
6694935	pre-training	diagnostic feature	86	0	4
6694935	pre-training	diagnostic feature	87	0	4
6694935	pre-training	diagnostic feature	88	0	5
6694935	pre-training	diagnostic feature	89	1	4
6694935	pre-training	diagnostic feature	90	0	3
6694935	pre-training	diagnostic feature	91	0	3
6694935	pre-training	diagnostic feature	92	0	3
6694935	pre-training	diagnostic feature	93	1	5
6694935	pre-training	diagnostic feature	94	1	3
6694935	pre-training	diagnostic feature	95	1	0
6694935	pre-training	diagnostic feature	96	1	3
6694935	pre-training	diagnostic feature	97	0	4
6694935	pre-training	diagnostic feature	98	1	4
6694935	pre-training	diagnostic feature	99	1	3
6694935	pre-training	diagnostic feature	100	0	4
6694935	pre-training	diagnostic feature	101	1	5
6694935	pre-training	diagnostic feature	102	1	4
6694935	pre-training	diagnostic feature	103	1	4
6694935	pre-training	diagnostic feature	104	0	4
6694935	pre-training	diagnostic feature	105	0	4
6694935	pre-training	diagnostic feature	106	0	3
6694935	pre-training	diagnostic feature	107	0	4
6694935	pre-training	diagnostic feature	108	0	4
6694935	pre-training	diagnostic feature	109	0	5
6694935	pre-training	diagnostic feature	110	0	3
6694935	pre-training	diagnostic feature	111	0	3
6694935	pre-training	diagnostic feature	112	1	4
6694935	pre-training	diagnostic feature	113	0	5
6694935	pre-training	diagnostic feature	114	0	3
6694935	pre-training	diagnostic feature	115	1	4
6694935	pre-training	diagnostic feature	116	0	4
6694935	pre-training	diagnostic feature	117	0	4
6694935	pre-training	diagnostic feature	118	1	4
6694935	pre-training	diagnostic feature	119	1	4
6694935	pre-training	diagnostic feature	120	0	4
6694935	pre-training	diagnostic feature	121	1	5
6694935	pre-training	diagnostic feature	122	0	4
6694935	pre-training	diagnostic feature	123	1	3
6694935	pre-training	diagnostic feature	124	0	4
6694935	pre-training	diagnostic feature	125	1	4
6694935	pre-training	diagnostic feature	126	1	5
6694935	pre-training	diagnostic feature	127	1	4
6694935	pre-training	diagnostic feature	128	1	3
6694935	pre-training	diagnostic feature	129	0	4
6694935	pre-training	diagnostic feature	130	1	5
6694935	pre-training	diagnostic feature	131	1	3
6694935	pre-training	diagnostic feature	132	1	3
6694935	pre-training	diagnostic feature	133	1	3
6694935	pre-training	diagnostic feature	134	0	4
6694935	pre-training	diagnostic feature	135	0	4
6694935	pre-training	diagnostic feature	136	0	3
6694935	pre-training	diagnostic feature	137	1	4
6694935	pre-training	diagnostic feature	138	1	5
6694935	pre-training	diagnostic feature	139	1	5
6694935	pre-training	diagnostic feature	140	1	4
6694935	pre-training	diagnostic feature	141	0	4
6694935	pre-training	diagnostic feature	142	1	4
6694935	pre-training	diagnostic feature	143	0	4
6694935	pre-training	diagnostic feature	144	1	4
6694935	pre-training	diagnostic feature	145	1	4
6694935	pre-training	diagnostic feature	146	1	4
6694935	pre-training	diagnostic feature	147	1	4
6694935	pre-training	diagnostic feature	148	0	4
6694935	pre-training	diagnostic feature	149	1	4
6694935	pre-training	diagnostic feature	150	1	4
6694935	pre-training	diagnostic feature	151	0	3
6694935	pre-training	diagnostic feature	152	1	5
6694935	pre-training	diagnostic feature	153	1	3
6694935	pre-training	diagnostic feature	154	1	4
6694935	pre-training	diagnostic feature	155	1	3
6694935	pre-training	diagnostic feature	156	1	4
6694935	pre-training	diagnostic feature	157	1	4
6694935	pre-training	diagnostic feature	158	0	4
6694935	pre-training	diagnostic feature	159	1	3
6694935	pre-training	diagnostic feature	160	1	5
6694935	pre-training	diagnostic feature	161	1	4
6694935	pre-training	diagnostic feature	162	1	4
6694935	pre-training	diagnostic feature	163	1	5
6694935	pre-training	diagnostic feature	164	1	4
6694935	pre-training	diagnostic feature	165	1	4
6694935	pre-training	diagnostic feature	166	1	4
6694935	pre-training	diagnostic feature	167	1	4
6694935	pre-training	diagnostic feature	168	0	3
6694941	post-training	diagnostic feature	85	0	5
6694941	post-training	diagnostic feature	86	1	3
6694941	post-training	diagnostic feature	87	0	5
6694941	post-training	diagnostic feature	88	1	5
6694941	post-training	diagnostic feature	89	1	5
6694941	post-training	diagnostic feature	90	1	5
6694941	post-training	diagnostic feature	91	0	3
6694941	post-training	diagnostic feature	92	1	5
6694941	post-training	diagnostic feature	93	1	5
6694941	post-training	diagnostic feature	94	1	5
6694941	post-training	diagnostic feature	95	1	0
6694941	post-training	diagnostic feature	96	1	5
6694941	post-training	diagnostic feature	97	1	0
6694941	post-training	diagnostic feature	98	1	5
6694941	post-training	diagnostic feature	99	0	0
6694941	post-training	diagnostic feature	100	1	0
6694941	post-training	diagnostic feature	101	1	3
6694941	post-training	diagnostic feature	102	0	3
6694941	post-training	diagnostic feature	103	0	5
6694941	post-training	diagnostic feature	104	0	5
6694941	post-training	diagnostic feature	105	0	5
6694941	post-training	diagnostic feature	106	0	5
6694941	post-training	diagnostic feature	107	0	5
6694941	post-training	diagnostic feature	108	1	3
6694941	post-training	diagnostic feature	109	1	3
6694941	post-training	diagnostic feature	110	0	5
6694941	post-training	diagnostic feature	111	1	5
6694941	post-training	diagnostic feature	112	1	5
6694941	post-training	diagnostic feature	113	0	3
6694941	post-training	diagnostic feature	114	1	5
6694941	post-training	diagnostic feature	115	1	3
6694941	post-training	diagnostic feature	116	0	5
6694941	post-training	diagnostic feature	117	0	5
6694941	post-training	diagnostic feature	118	1	5
6694941	post-training	diagnostic feature	119	1	5
6694941	post-training	diagnostic feature	120	0	3
6694941	post-training	diagnostic feature	121	1	5
6694941	post-training	diagnostic feature	122	0	3
6694941	post-training	diagnostic feature	123	1	3
6694941	post-training	diagnostic feature	124	0	5
6694941	post-training	diagnostic feature	125	1	0
6694941	post-training	diagnostic feature	126	0	5
6694941	post-training	diagnostic feature	127	1	5
6694941	post-training	diagnostic feature	128	1	5
6694941	post-training	diagnostic feature	129	1	5
6694941	post-training	diagnostic feature	130	1	5
6694941	post-training	diagnostic feature	131	1	5
6694941	post-training	diagnostic feature	132	1	5
6694941	post-training	diagnostic feature	133	1	5
6694941	post-training	diagnostic feature	134	0	0
6694941	post-training	diagnostic feature	135	1	5
6694941	post-training	diagnostic feature	136	0	5
6694941	post-training	diagnostic feature	137	1	5
6694941	post-training	diagnostic feature	138	1	5
6694941	post-training	diagnostic feature	139	1	5
6694941	post-training	diagnostic feature	140	0	5
6694941	post-training	diagnostic feature	141	1	5
6694941	post-training	diagnostic feature	142	1	5
6694941	post-training	diagnostic feature	143	0	5
6694941	post-training	diagnostic feature	144	1	5
6694941	post-training	diagnostic feature	145	1	5
6694941	post-training	diagnostic feature	146	1	5
6694941	post-training	diagnostic feature	147	0	3
6694941	post-training	diagnostic feature	148	1	5
6694941	post-training	diagnostic feature	149	1	5
6694941	post-training	diagnostic feature	150	1	5
6694941	post-training	diagnostic feature	151	1	5
6694941	post-training	diagnostic feature	152	1	5
6694941	post-training	diagnostic feature	153	1	5
6694941	post-training	diagnostic feature	154	1	5
6694941	post-training	diagnostic feature	155	1	5
6694941	post-training	diagnostic feature	156	1	5
6694941	post-training	diagnostic feature	157	1	5
6694941	post-training	diagnostic feature	158	1	5
6694941	post-training	diagnostic feature	159	1	5
6694941	post-training	diagnostic feature	160	1	5
6694941	post-training	diagnostic feature	161	1	5
6694941	post-training	diagnostic feature	162	1	5
6694941	post-training	diagnostic feature	163	1	5
6694941	post-training	diagnostic feature	164	1	5
6694941	post-training	diagnostic feature	165	1	5
6694941	post-training	diagnostic feature	166	1	5
6694941	post-training	diagnostic feature	167	0	3
6694941	post-training	diagnostic feature	168	1	3
6694941	pre-training	diagnostic feature	1	1	5
6694941	pre-training	diagnostic feature	2	0	5
6694941	pre-training	diagnostic feature	3	1	5
6694941	pre-training	diagnostic feature	4	1	5
6694941	pre-training	diagnostic feature	5	1	5
6694941	pre-training	diagnostic feature	6	1	5
6694941	pre-training	diagnostic feature	7	0	5
6694941	pre-training	diagnostic feature	8	0	5
6694941	pre-training	diagnostic feature	9	1	5
6694941	pre-training	diagnostic feature	10	1	5
6694941	pre-training	diagnostic feature	11	1	5
6694941	pre-training	diagnostic feature	12	1	5
6694941	pre-training	diagnostic feature	13	1	5
6694941	pre-training	diagnostic feature	14	1	5
6694941	pre-training	diagnostic feature	15	1	5
6694941	pre-training	diagnostic feature	16	1	0
6694941	pre-training	diagnostic feature	17	1	5
6694941	pre-training	diagnostic feature	18	0	5
6694941	pre-training	diagnostic feature	19	1	5
6694941	pre-training	diagnostic feature	20	1	5
6694941	pre-training	diagnostic feature	21	0	5
6694941	pre-training	diagnostic feature	22	0	5
6694941	pre-training	diagnostic feature	23	1	5
6694941	pre-training	diagnostic feature	24	0	5
6694941	pre-training	diagnostic feature	25	0	5
6694941	pre-training	diagnostic feature	26	0	5
6694941	pre-training	diagnostic feature	27	1	0
6694941	pre-training	diagnostic feature	28	1	5
6694941	pre-training	diagnostic feature	29	1	5
6694941	pre-training	diagnostic feature	30	1	5
6694941	pre-training	diagnostic feature	31	0	3
6694941	pre-training	diagnostic feature	32	1	5
6694941	pre-training	diagnostic feature	33	0	3
6694941	pre-training	diagnostic feature	34	0	5
6694941	pre-training	diagnostic feature	35	1	3
6694941	pre-training	diagnostic feature	36	1	3
6694941	pre-training	diagnostic feature	37	1	5
6694941	pre-training	diagnostic feature	38	1	5
6694941	pre-training	diagnostic feature	39	0	5
6694941	pre-training	diagnostic feature	40	1	3
6694941	pre-training	diagnostic feature	41	1	5
6694941	pre-training	diagnostic feature	42	1	5
6694941	pre-training	diagnostic feature	43	0	5
6694941	pre-training	diagnostic feature	44	1	5
6694941	pre-training	diagnostic feature	45	1	5
6694941	pre-training	diagnostic feature	46	1	5
6694941	pre-training	diagnostic feature	47	1	5
6694941	pre-training	diagnostic feature	48	1	3
6694941	pre-training	diagnostic feature	49	1	5
6694941	pre-training	diagnostic feature	50	0	3
6694941	pre-training	diagnostic feature	51	1	3
6694941	pre-training	diagnostic feature	52	0	3
6694941	pre-training	diagnostic feature	53	1	5
6694941	pre-training	diagnostic feature	54	1	0
6694941	pre-training	diagnostic feature	55	1	5
6694941	pre-training	diagnostic feature	56	1	5
6694941	pre-training	diagnostic feature	57	0	5
6694941	pre-training	diagnostic feature	58	0	0
6694941	pre-training	diagnostic feature	59	1	3
6694941	pre-training	diagnostic feature	60	1	5
6694941	pre-training	diagnostic feature	61	1	3
6694941	pre-training	diagnostic feature	62	1	5
6694941	pre-training	diagnostic feature	63	0	5
6694941	pre-training	diagnostic feature	64	1	3
6694941	pre-training	diagnostic feature	65	1	2
6694941	pre-training	diagnostic feature	66	1	5
6694941	pre-training	diagnostic feature	67	1	3
6694941	pre-training	diagnostic feature	68	1	5
6694941	pre-training	diagnostic feature	69	1	5
6694941	pre-training	diagnostic feature	70	1	5
6694941	pre-training	diagnostic feature	71	1	5
6694941	pre-training	diagnostic feature	72	1	5
6694941	pre-training	diagnostic feature	73	1	5
6694941	pre-training	diagnostic feature	74	1	0
6694941	pre-training	diagnostic feature	75	1	5
6694941	pre-training	diagnostic feature	76	1	5
6694941	pre-training	diagnostic feature	77	1	5
6694941	pre-training	diagnostic feature	78	1	5
6694941	pre-training	diagnostic feature	79	1	5
6694941	pre-training	diagnostic feature	80	1	5
6694941	pre-training	diagnostic feature	81	1	5
6694941	pre-training	diagnostic feature	82	1	5
6694941	pre-training	diagnostic feature	83	1	3
6694941	pre-training	diagnostic feature	84	1	3
6695370	post-training	diagnostic feature	85	0	4
6695370	post-training	diagnostic feature	86	0	4
6695370	post-training	diagnostic feature	87	0	4
6695370	post-training	diagnostic feature	88	0	4
6695370	post-training	diagnostic feature	89	0	3
6695370	post-training	diagnostic feature	90	0	4
6695370	post-training	diagnostic feature	91	0	4
6695370	post-training	diagnostic feature	92	1	4
6695370	post-training	diagnostic feature	93	0	4
6695370	post-training	diagnostic feature	94	0	4
6695370	post-training	diagnostic feature	95	0	5
6695370	post-training	diagnostic feature	96	0	4
6695370	post-training	diagnostic feature	97	0	4
6695370	post-training	diagnostic feature	98	0	4
6695370	post-training	diagnostic feature	99	1	4
6695370	post-training	diagnostic feature	100	0	4
6695370	post-training	diagnostic feature	101	0	4
6695370	post-training	diagnostic feature	102	1	4
6695370	post-training	diagnostic feature	103	0	3
6695370	post-training	diagnostic feature	104	0	4
6695370	post-training	diagnostic feature	105	0	4
6695370	post-training	diagnostic feature	106	0	4
6695370	post-training	diagnostic feature	107	0	5
6695370	post-training	diagnostic feature	108	0	4
6695370	post-training	diagnostic feature	109	0	4
6695370	post-training	diagnostic feature	110	0	4
6695370	post-training	diagnostic feature	111	0	4
6695370	post-training	diagnostic feature	112	0	4
6695370	post-training	diagnostic feature	113	0	4
6695370	post-training	diagnostic feature	114	0	4
6695370	post-training	diagnostic feature	115	0	3
6695370	post-training	diagnostic feature	116	0	4
6695370	post-training	diagnostic feature	117	0	4
6695370	post-training	diagnostic feature	118	0	4
6695370	post-training	diagnostic feature	119	0	4
6695370	post-training	diagnostic feature	120	0	3
6695370	post-training	diagnostic feature	121	1	5
6695370	post-training	diagnostic feature	122	1	4
6695370	post-training	diagnostic feature	123	0	4
6695370	post-training	diagnostic feature	124	0	5
6695370	post-training	diagnostic feature	125	0	4
6695370	post-training	diagnostic feature	126	1	4
6695370	post-training	diagnostic feature	127	1	4
6695370	post-training	diagnostic feature	128	1	4
6695370	post-training	diagnostic feature	129	1	5
6695370	post-training	diagnostic feature	130	1	4
6695370	post-training	diagnostic feature	131	1	4
6695370	post-training	diagnostic feature	132	1	4
6695370	post-training	diagnostic feature	133	1	4
6695370	post-training	diagnostic feature	134	1	4
6695370	post-training	diagnostic feature	135	1	4
6695370	post-training	diagnostic feature	136	1	3
6695370	post-training	diagnostic feature	137	1	4
6695370	post-training	diagnostic feature	138	1	4
6695370	post-training	diagnostic feature	139	1	4
6695370	post-training	diagnostic feature	140	1	4
6695370	post-training	diagnostic feature	141	1	4
6695370	post-training	diagnostic feature	142	1	4
6695370	post-training	diagnostic feature	143	1	4
6695370	post-training	diagnostic feature	144	1	4
6695370	post-training	diagnostic feature	145	1	4
6695370	post-training	diagnostic feature	146	1	5
6695370	post-training	diagnostic feature	147	1	4
6695370	post-training	diagnostic feature	148	1	4
6695370	post-training	diagnostic feature	149	1	4
6695370	post-training	diagnostic feature	150	1	4
6695370	post-training	diagnostic feature	151	1	4
6695370	post-training	diagnostic feature	152	1	5
6695370	post-training	diagnostic feature	153	1	4
6695370	post-training	diagnostic feature	154	1	4
6695370	post-training	diagnostic feature	155	1	4
6695370	post-training	diagnostic feature	156	1	3
6695370	post-training	diagnostic feature	157	1	4
6695370	post-training	diagnostic feature	158	1	4
6695370	post-training	diagnostic feature	159	1	4
6695370	post-training	diagnostic feature	160	1	5
6695370	post-training	diagnostic feature	161	1	4
6695370	post-training	diagnostic feature	162	1	5
6695370	post-training	diagnostic feature	163	1	4
6695370	post-training	diagnostic feature	164	1	4
6695370	post-training	diagnostic feature	165	1	4
6695370	post-training	diagnostic feature	166	1	4
6695370	post-training	diagnostic feature	167	1	4
6695370	post-training	diagnostic feature	168	1	4
6695370	pre-training	diagnostic feature	1	1	5
6695370	pre-training	diagnostic feature	2	0	4
6695370	pre-training	diagnostic feature	3	0	4
6695370	pre-training	diagnostic feature	4	0	4
6695370	pre-training	diagnostic feature	5	1	3
6695370	pre-training	diagnostic feature	6	1	5
6695370	pre-training	diagnostic feature	7	1	4
6695370	pre-training	diagnostic feature	8	0	4
6695370	pre-training	diagnostic feature	9	1	4
6695370	pre-training	diagnostic feature	10	1	4
6695370	pre-training	diagnostic feature	11	1	4
6695370	pre-training	diagnostic feature	12	1	4
6695370	pre-training	diagnostic feature	13	1	4
6695370	pre-training	diagnostic feature	14	0	5
6695370	pre-training	diagnostic feature	15	1	4
6695370	pre-training	diagnostic feature	16	1	4
6695370	pre-training	diagnostic feature	17	1	5
6695370	pre-training	diagnostic feature	18	0	5
6695370	pre-training	diagnostic feature	19	1	4
6695370	pre-training	diagnostic feature	20	1	4
6695370	pre-training	diagnostic feature	21	1	4
6695370	pre-training	diagnostic feature	22	1	4
6695370	pre-training	diagnostic feature	23	1	5
6695370	pre-training	diagnostic feature	24	0	4
6695370	pre-training	diagnostic feature	25	0	5
6695370	pre-training	diagnostic feature	26	0	4
6695370	pre-training	diagnostic feature	27	1	4
6695370	pre-training	diagnostic feature	28	0	3
6695370	pre-training	diagnostic feature	29	1	4
6695370	pre-training	diagnostic feature	30	1	4
6695370	pre-training	diagnostic feature	31	0	3
6695370	pre-training	diagnostic feature	32	1	3
6695370	pre-training	diagnostic feature	33	0	4
6695370	pre-training	diagnostic feature	34	1	4
6695370	pre-training	diagnostic feature	35	1	4
6695370	pre-training	diagnostic feature	36	0	4
6695370	pre-training	diagnostic feature	37	1	4
6695370	pre-training	diagnostic feature	38	1	4
6695370	pre-training	diagnostic feature	39	0	4
6695370	pre-training	diagnostic feature	40	0	4
6695370	pre-training	diagnostic feature	41	1	4
6695370	pre-training	diagnostic feature	42	0	4
6695370	pre-training	diagnostic feature	43	0	4
6695370	pre-training	diagnostic feature	44	0	5
6695370	pre-training	diagnostic feature	45	0	4
6695370	pre-training	diagnostic feature	46	1	4
6695370	pre-training	diagnostic feature	47	0	3
6695370	pre-training	diagnostic feature	48	1	3
6695370	pre-training	diagnostic feature	49	1	4
6695370	pre-training	diagnostic feature	50	1	4
6695370	pre-training	diagnostic feature	51	1	4
6695370	pre-training	diagnostic feature	52	1	3
6695370	pre-training	diagnostic feature	53	1	4
6695370	pre-training	diagnostic feature	54	1	4
6695370	pre-training	diagnostic feature	55	1	4
6695370	pre-training	diagnostic feature	56	1	5
6695370	pre-training	diagnostic feature	57	1	3
6695370	pre-training	diagnostic feature	58	1	4
6695370	pre-training	diagnostic feature	59	1	3
6695370	pre-training	diagnostic feature	60	1	4
6695370	pre-training	diagnostic feature	61	0	4
6695370	pre-training	diagnostic feature	62	1	5
6695370	pre-training	diagnostic feature	63	1	3
6695370	pre-training	diagnostic feature	64	1	4
6695370	pre-training	diagnostic feature	65	1	5
6695370	pre-training	diagnostic feature	66	1	4
6695370	pre-training	diagnostic feature	67	1	5
6695370	pre-training	diagnostic feature	68	1	4
6695370	pre-training	diagnostic feature	69	1	5
6695370	pre-training	diagnostic feature	70	1	4
6695370	pre-training	diagnostic feature	71	1	5
6695370	pre-training	diagnostic feature	72	1	4
6695370	pre-training	diagnostic feature	73	1	5
6695370	pre-training	diagnostic feature	74	1	4
6695370	pre-training	diagnostic feature	75	1	3
6695370	pre-training	diagnostic feature	76	1	4
6695370	pre-training	diagnostic feature	77	1	5
6695370	pre-training	diagnostic feature	78	0	4
6695370	pre-training	diagnostic feature	79	1	4
6695370	pre-training	diagnostic feature	80	1	5
6695370	pre-training	diagnostic feature	81	1	4
6695370	pre-training	diagnostic feature	82	1	4
6695370	pre-training	diagnostic feature	83	1	4
6695370	pre-training	diagnostic feature	84	1	4
6698317	post-training	control	85	1	3
6698317	post-training	control	86	0	3
6698317	post-training	control	87	0	2
6698317	post-training	control	88	1	4
6698317	post-training	control	89	1	4
6698317	post-training	control	90	1	4
6698317	post-training	control	91	0	2
6698317	post-training	control	92	1	4
6698317	post-training	control	93	0	3
6698317	post-training	control	94	0	2
6698317	post-training	control	95	1	4
6698317	post-training	control	96	1	4
6698317	post-training	control	97	0	5
6698317	post-training	control	98	0	3
6698317	post-training	control	99	0	3
6698317	post-training	control	100	0	5
6698317	post-training	control	101	1	4
6698317	post-training	control	102	0	5
6698317	post-training	control	103	0	5
6698317	post-training	control	104	0	3
6698317	post-training	control	105	0	5
6698317	post-training	control	106	0	5
6698317	post-training	control	107	0	5
6698317	post-training	control	108	0	3
6698317	post-training	control	109	0	5
6698317	post-training	control	110	0	0
6698317	post-training	control	111	0	3
6698317	post-training	control	112	0	5
6698317	post-training	control	113	0	0
6698317	post-training	control	114	0	4
6698317	post-training	control	115	1	3
6698317	post-training	control	116	0	5
6698317	post-training	control	117	0	4
6698317	post-training	control	118	0	3
6698317	post-training	control	119	0	5
6698317	post-training	control	120	0	5
6698317	post-training	control	121	1	3
6698317	post-training	control	122	0	3
6698317	post-training	control	123	0	3
6698317	post-training	control	124	0	4
6698317	post-training	control	125	0	4
6698317	post-training	control	126	1	2
6698317	post-training	control	127	1	4
6698317	post-training	control	128	1	5
6698317	post-training	control	129	1	5
6698317	post-training	control	130	1	5
6698317	post-training	control	131	1	5
6698317	post-training	control	132	1	4
6698317	post-training	control	133	1	4
6698317	post-training	control	134	1	4
6698317	post-training	control	135	1	5
6698317	post-training	control	136	1	5
6698317	post-training	control	137	1	4
6698317	post-training	control	138	1	4
6698317	post-training	control	139	1	5
6698317	post-training	control	140	1	5
6698317	post-training	control	141	1	3
6698317	post-training	control	142	1	5
6698317	post-training	control	143	1	4
6698317	post-training	control	144	1	2
6698317	post-training	control	145	1	4
6698317	post-training	control	146	1	4
6698317	post-training	control	147	1	3
6698317	post-training	control	148	1	5
6698317	post-training	control	149	1	4
6698317	post-training	control	150	1	5
6698317	post-training	control	151	1	4
6698317	post-training	control	152	1	5
6698317	post-training	control	153	1	4
6698317	post-training	control	154	1	4
6698317	post-training	control	155	1	4
6698317	post-training	control	156	1	5
6698317	post-training	control	157	1	5
6698317	post-training	control	158	1	4
6698317	post-training	control	159	1	5
6698317	post-training	control	160	1	4
6698317	post-training	control	161	1	4
6698317	post-training	control	162	1	5
6698317	post-training	control	163	1	4
6698317	post-training	control	164	1	4
6698317	post-training	control	165	1	3
6698317	post-training	control	166	1	4
6698317	post-training	control	167	1	5
6698317	post-training	control	168	1	3
6698317	pre-training	control	1	1	5
6698317	pre-training	control	2	0	5
6698317	pre-training	control	3	0	3
6698317	pre-training	control	4	0	4
6698317	pre-training	control	5	1	3
6698317	pre-training	control	6	0	3
6698317	pre-training	control	7	0	4
6698317	pre-training	control	8	1	3
6698317	pre-training	control	9	1	5
6698317	pre-training	control	10	0	2
6698317	pre-training	control	11	1	3
6698317	pre-training	control	12	0	5
6698317	pre-training	control	13	0	4
6698317	pre-training	control	14	1	2
6698317	pre-training	control	15	0	3
6698317	pre-training	control	16	0	5
6698317	pre-training	control	17	1	4
6698317	pre-training	control	18	0	4
6698317	pre-training	control	19	1	5
6698317	pre-training	control	20	1	3
6698317	pre-training	control	21	0	4
6698317	pre-training	control	22	1	3
6698317	pre-training	control	23	1	3
6698317	pre-training	control	24	0	4
6698317	pre-training	control	25	0	4
6698317	pre-training	control	26	1	4
6698317	pre-training	control	27	0	5
6698317	pre-training	control	28	0	5
6698317	pre-training	control	29	0	5
6698317	pre-training	control	30	0	3
6698317	pre-training	control	31	0	4
6698317	pre-training	control	32	1	4
6698317	pre-training	control	33	1	4
6698317	pre-training	control	34	0	4
6698317	pre-training	control	35	1	3
6698317	pre-training	control	36	1	3
6698317	pre-training	control	37	0	5
6698317	pre-training	control	38	1	4
6698317	pre-training	control	39	1	2
6698317	pre-training	control	40	0	4
6698317	pre-training	control	41	1	2
6698317	pre-training	control	42	0	3
6698317	pre-training	control	43	1	4
6698317	pre-training	control	44	1	4
6698317	pre-training	control	45	1	5
6698317	pre-training	control	46	1	4
6698317	pre-training	control	47	1	4
6698317	pre-training	control	48	1	5
6698317	pre-training	control	49	1	5
6698317	pre-training	control	50	1	5
6698317	pre-training	control	51	1	4
6698317	pre-training	control	52	1	4
6698317	pre-training	control	53	1	4
6698317	pre-training	control	54	1	5
6698317	pre-training	control	55	1	4
6698317	pre-training	control	56	1	4
6698317	pre-training	control	57	1	4
6698317	pre-training	control	58	1	4
6698317	pre-training	control	59	1	4
6698317	pre-training	control	60	1	4
6698317	pre-training	control	61	0	1
6698317	pre-training	control	62	1	5
6698317	pre-training	control	63	1	4
6698317	pre-training	control	64	1	4
6698317	pre-training	control	65	1	4
6698317	pre-training	control	66	1	4
6698317	pre-training	control	67	1	4
6698317	pre-training	control	68	0	3
6698317	pre-training	control	69	1	3
6698317	pre-training	control	70	1	5
6698317	pre-training	control	71	1	5
6698317	pre-training	control	72	1	3
6698317	pre-training	control	73	1	4
6698317	pre-training	control	74	1	5
6698317	pre-training	control	75	1	4
6698317	pre-training	control	76	1	5
6698317	pre-training	control	77	1	5
6698317	pre-training	control	78	1	5
6698317	pre-training	control	79	1	5
6698317	pre-training	control	80	1	5
6698317	pre-training	control	81	1	3
6698317	pre-training	control	82	1	5
6698317	pre-training	control	83	1	4
6698317	pre-training	control	84	1	4
6698318	post-training	control	85	0	4
6698318	post-training	control	86	1	5
6698318	post-training	control	87	0	4
6698318	post-training	control	88	1	3
6698318	post-training	control	89	1	4
6698318	post-training	control	90	1	4
6698318	post-training	control	91	1	3
6698318	post-training	control	92	1	4
6698318	post-training	control	93	0	5
6698318	post-training	control	94	1	5
6698318	post-training	control	95	1	5
6698318	post-training	control	96	0	3
6698318	post-training	control	97	0	5
6698318	post-training	control	98	1	5
6698318	post-training	control	99	0	4
6698318	post-training	control	100	1	5
6698318	post-training	control	101	0	3
6698318	post-training	control	102	0	5
6698318	post-training	control	103	1	4
6698318	post-training	control	104	0	5
6698318	post-training	control	105	1	5
6698318	post-training	control	106	0	5
6698318	post-training	control	107	0	5
6698318	post-training	control	108	0	5
6698318	post-training	control	109	0	5
6698318	post-training	control	110	1	3
6698318	post-training	control	111	1	4
6698318	post-training	control	112	1	4
6698318	post-training	control	113	1	5
6698318	post-training	control	114	1	4
6698318	post-training	control	115	1	5
6698318	post-training	control	116	0	5
6698318	post-training	control	117	0	5
6698318	post-training	control	118	1	4
6698318	post-training	control	119	0	5
6698318	post-training	control	120	0	4
6698318	post-training	control	121	1	3
6698318	post-training	control	122	0	5
6698318	post-training	control	123	0	3
6698318	post-training	control	124	1	4
6698318	post-training	control	125	0	3
6698318	post-training	control	126	0	2
6698318	post-training	control	127	1	5
6698318	post-training	control	128	1	5
6698318	post-training	control	129	1	5
6698318	post-training	control	130	1	5
6698318	post-training	control	131	1	5
6698318	post-training	control	132	1	5
6698318	post-training	control	133	1	5
6698318	post-training	control	134	1	5
6698318	post-training	control	135	1	4
6698318	post-training	control	136	1	5
6698318	post-training	control	137	1	5
6698318	post-training	control	138	1	5
6698318	post-training	control	139	1	5
6698318	post-training	control	140	1	4
6698318	post-training	control	141	1	3
6698318	post-training	control	142	1	4
6698318	post-training	control	143	1	5
6698318	post-training	control	144	1	5
6698318	post-training	control	145	1	5
6698318	post-training	control	146	1	5
6698318	post-training	control	147	1	5
6698318	post-training	control	148	1	3
6698318	post-training	control	149	1	5
6698318	post-training	control	150	1	5
6698318	post-training	control	151	1	5
6698318	post-training	control	152	0	3
6698318	post-training	control	153	1	5
6698318	post-training	control	154	0	4
6698318	post-training	control	155	1	3
6698318	post-training	control	156	1	4
6698318	post-training	control	157	1	5
6698318	post-training	control	158	1	3
6698318	post-training	control	159	1	5
6698318	post-training	control	160	1	5
6698318	post-training	control	161	1	5
6698318	post-training	control	162	1	5
6698318	post-training	control	163	1	5
6698318	post-training	control	164	1	5
6698318	post-training	control	165	1	3
6698318	post-training	control	166	1	4
6698318	post-training	control	167	1	3
6698318	post-training	control	168	1	4
6698318	pre-training	control	1	1	5
6698318	pre-training	control	2	1	2
6698318	pre-training	control	3	1	4
6698318	pre-training	control	4	0	3
6698318	pre-training	control	5	0	5
6698318	pre-training	control	6	1	4
6698318	pre-training	control	7	1	3
6698318	pre-training	control	8	0	4
6698318	pre-training	control	9	1	5
6698318	pre-training	control	10	0	5
6698318	pre-training	control	11	1	4
6698318	pre-training	control	12	1	5
6698318	pre-training	control	13	0	5
6698318	pre-training	control	14	1	5
6698318	pre-training	control	15	1	4
6698318	pre-training	control	16	1	5
6698318	pre-training	control	17	1	5
6698318	pre-training	control	18	0	5
6698318	pre-training	control	19	1	5
6698318	pre-training	control	20	1	4
6698318	pre-training	control	21	1	4
6698318	pre-training	control	22	0	5
6698318	pre-training	control	23	1	4
6698318	pre-training	control	24	1	3
6698318	pre-training	control	25	0	5
6698318	pre-training	control	26	1	5
6698318	pre-training	control	27	0	5
6698318	pre-training	control	28	0	3
6698318	pre-training	control	29	1	5
6698318	pre-training	control	30	1	5
6698318	pre-training	control	31	0	5
6698318	pre-training	control	32	1	4
6698318	pre-training	control	33	0	4
6698318	pre-training	control	34	0	5
6698318	pre-training	control	35	1	4
6698318	pre-training	control	36	0	4
6698318	pre-training	control	37	0	5
6698318	pre-training	control	38	1	5
6698318	pre-training	control	39	0	5
6698318	pre-training	control	40	1	5
6698318	pre-training	control	41	0	5
6698318	pre-training	control	42	0	5
6698318	pre-training	control	43	1	5
6698318	pre-training	control	44	1	5
6698318	pre-training	control	45	1	4
6698318	pre-training	control	46	1	3
6698318	pre-training	control	47	1	5
6698318	pre-training	control	48	1	5
6698318	pre-training	control	49	1	5
6698318	pre-training	control	50	1	5
6698318	pre-training	control	51	1	5
6698318	pre-training	control	52	1	5
6698318	pre-training	control	53	1	5
6698318	pre-training	control	54	1	5
6698318	pre-training	control	55	1	4
6698318	pre-training	control	56	1	5
6698318	pre-training	control	57	1	5
6698318	pre-training	control	58	1	4
6698318	pre-training	control	59	1	5
6698318	pre-training	control	60	1	5
6698318	pre-training	control	61	1	4
6698318	pre-training	control	62	1	5
6698318	pre-training	control	63	1	5
6698318	pre-training	control	64	1	5
6698318	pre-training	control	65	1	5
6698318	pre-training	control	66	1	5
6698318	pre-training	control	67	1	5
6698318	pre-training	control	68	1	5
6698318	pre-training	control	69	1	5
6698318	pre-training	control	70	1	5
6698318	pre-training	control	71	1	5
6698318	pre-training	control	72	1	5
6698318	pre-training	control	73	1	4
6698318	pre-training	control	74	1	5
6698318	pre-training	control	75	1	5
6698318	pre-training	control	76	1	5
6698318	pre-training	control	77	1	4
6698318	pre-training	control	78	1	5
6698318	pre-training	control	79	1	5
6698318	pre-training	control	80	1	5
6698318	pre-training	control	81	1	4
6698318	pre-training	control	82	1	5
6698318	pre-training	control	83	1	5
6698318	pre-training	control	84	1	3
6698323	post-training	control	85	0	4
6698323	post-training	control	86	1	5
6698323	post-training	control	87	1	5
6698323	post-training	control	88	1	5
6698323	post-training	control	89	1	4
6698323	post-training	control	90	1	5
6698323	post-training	control	91	0	4
6698323	post-training	control	92	1	5
6698323	post-training	control	93	1	4
6698323	post-training	control	94	1	5
6698323	post-training	control	95	0	4
6698323	post-training	control	96	1	5
6698323	post-training	control	97	0	5
6698323	post-training	control	98	1	5
6698323	post-training	control	99	1	5
6698323	post-training	control	100	1	4
6698323	post-training	control	101	1	5
6698323	post-training	control	102	1	5
6698323	post-training	control	103	0	5
6698323	post-training	control	104	1	5
6698323	post-training	control	105	1	5
6698323	post-training	control	106	0	4
6698323	post-training	control	107	1	5
6698323	post-training	control	108	0	4
6698323	post-training	control	109	1	5
6698323	post-training	control	110	1	5
6698323	post-training	control	111	0	4
6698323	post-training	control	112	1	4
6698323	post-training	control	113	0	5
6698323	post-training	control	114	1	5
6698323	post-training	control	115	1	4
6698323	post-training	control	116	0	4
6698323	post-training	control	117	0	4
6698323	post-training	control	118	1	5
6698323	post-training	control	119	0	4
6698323	post-training	control	120	1	4
6698323	post-training	control	121	1	5
6698323	post-training	control	122	1	5
6698323	post-training	control	123	1	4
6698323	post-training	control	124	0	4
6698323	post-training	control	125	1	5
6698323	post-training	control	126	1	5
6698323	post-training	control	127	0	5
6698323	post-training	control	128	1	4
6698323	post-training	control	129	0	5
6698323	post-training	control	130	0	5
6698323	post-training	control	131	1	3
6698323	post-training	control	132	1	5
6698323	post-training	control	133	1	5
6698323	post-training	control	134	0	3
6698323	post-training	control	135	1	4
6698323	post-training	control	136	0	5
6698323	post-training	control	137	1	4
6698323	post-training	control	138	1	5
6698323	post-training	control	139	1	4
6698323	post-training	control	140	0	4
6698323	post-training	control	141	1	5
6698323	post-training	control	142	1	4
6698323	post-training	control	143	1	4
6698323	post-training	control	144	0	5
6698323	post-training	control	145	1	4
6698323	post-training	control	146	1	5
6698323	post-training	control	147	0	3
6698323	post-training	control	148	1	4
6698323	post-training	control	149	1	5
6698323	post-training	control	150	1	5
6698323	post-training	control	151	1	4
6698323	post-training	control	152	0	5
6698323	post-training	control	153	1	4
6698323	post-training	control	154	1	4
6698323	post-training	control	155	1	4
6698323	post-training	control	156	1	3
6698323	post-training	control	157	0	3
6698323	post-training	control	158	1	3
6698323	post-training	control	159	1	5
6698323	post-training	control	160	1	4
6698323	post-training	control	161	1	4
6698323	post-training	control	162	1	4
6698323	post-training	control	163	1	4
6698323	post-training	control	164	1	4
6698323	post-training	control	165	1	5
6698323	post-training	control	166	1	4
6698323	post-training	control	167	1	3
6698323	post-training	control	168	1	5
6698323	pre-training	control	1	1	5
6698323	pre-training	control	2	0	4
6698323	pre-training	control	3	1	5
6698323	pre-training	control	4	0	4
6698323	pre-training	control	5	1	5
6698323	pre-training	control	6	1	4
6698323	pre-training	control	7	0	4
6698323	pre-training	control	8	0	4
6698323	pre-training	control	9	1	5
6698323	pre-training	control	10	1	5
6698323	pre-training	control	11	1	5
6698323	pre-training	control	12	1	5
6698323	pre-training	control	13	1	5
6698323	pre-training	control	14	1	5
6698323	pre-training	control	15	0	5
6698323	pre-training	control	16	1	5
6698323	pre-training	control	17	1	5
6698323	pre-training	control	18	0	4
6698323	pre-training	control	19	1	5
6698323	pre-training	control	20	1	5
6698323	pre-training	control	21	0	5
6698323	pre-training	control	22	1	5
6698323	pre-training	control	23	1	3
6698323	pre-training	control	24	1	5
6698323	pre-training	control	25	0	4
6698323	pre-training	control	26	1	5
6698323	pre-training	control	27	1	4
6698323	pre-training	control	28	1	5
6698323	pre-training	control	29	1	5
6698323	pre-training	control	30	1	5
6698323	pre-training	control	31	0	4
6698323	pre-training	control	32	1	5
6698323	pre-training	control	33	1	5
6698323	pre-training	control	34	0	5
6698323	pre-training	control	35	1	4
6698323	pre-training	control	36	0	5
6698323	pre-training	control	37	1	5
6698323	pre-training	control	38	1	5
6698323	pre-training	control	39	1	5
6698323	pre-training	control	40	1	5
6698323	pre-training	control	41	1	5
6698323	pre-training	control	42	1	5
6698323	pre-training	control	43	1	4
6698323	pre-training	control	44	1	4
6698323	pre-training	control	45	1	5
6698323	pre-training	control	46	1	1
6698323	pre-training	control	47	1	5
6698323	pre-training	control	48	1	4
6698323	pre-training	control	49	1	5
6698323	pre-training	control	50	1	4
6698323	pre-training	control	51	1	4
6698323	pre-training	control	52	0	4
6698323	pre-training	control	53	1	4
6698323	pre-training	control	54	1	5
6698323	pre-training	control	55	0	5
6698323	pre-training	control	56	1	4
6698323	pre-training	control	57	1	4
6698323	pre-training	control	58	0	4
6698323	pre-training	control	59	1	4
6698323	pre-training	control	60	1	5
6698323	pre-training	control	61	1	3
6698323	pre-training	control	62	1	5
6698323	pre-training	control	63	1	4
6698323	pre-training	control	64	1	4
6698323	pre-training	control	65	1	5
6698323	pre-training	control	66	1	5
6698323	pre-training	control	67	1	5
6698323	pre-training	control	68	1	5
6698323	pre-training	control	69	1	4
6698323	pre-training	control	70	1	4
6698323	pre-training	control	71	1	4
6698323	pre-training	control	72	1	4
6698323	pre-training	control	73	1	5
6698323	pre-training	control	74	1	4
6698323	pre-training	control	75	1	4
6698323	pre-training	control	76	1	4
6698323	pre-training	control	77	1	5
6698323	pre-training	control	78	1	4
6698323	pre-training	control	79	1	5
6698323	pre-training	control	80	1	4
6698323	pre-training	control	81	1	4
6698323	pre-training	control	82	1	4
6698323	pre-training	control	83	1	5
6698323	pre-training	control	84	1	4
6698326	post-training	diagnostic feature	85	0	4
6698326	post-training	diagnostic feature	86	1	4
6698326	post-training	diagnostic feature	87	1	5
6698326	post-training	diagnostic feature	88	0	4
6698326	post-training	diagnostic feature	89	1	5
6698326	post-training	diagnostic feature	90	1	2
6698326	post-training	diagnostic feature	91	0	4
6698326	post-training	diagnostic feature	92	1	4
6698326	post-training	diagnostic feature	93	1	4
6698326	post-training	diagnostic feature	94	1	4
6698326	post-training	diagnostic feature	95	0	3
6698326	post-training	diagnostic feature	96	1	4
6698326	post-training	diagnostic feature	97	0	4
6698326	post-training	diagnostic feature	98	0	3
6698326	post-training	diagnostic feature	99	1	3
6698326	post-training	diagnostic feature	100	1	4
6698326	post-training	diagnostic feature	101	0	3
6698326	post-training	diagnostic feature	102	1	4
6698326	post-training	diagnostic feature	103	0	4
6698326	post-training	diagnostic feature	104	1	4
6698326	post-training	diagnostic feature	105	0	3
6698326	post-training	diagnostic feature	106	0	4
6698326	post-training	diagnostic feature	107	0	5
6698326	post-training	diagnostic feature	108	1	3
6698326	post-training	diagnostic feature	109	1	4
6698326	post-training	diagnostic feature	110	1	4
6698326	post-training	diagnostic feature	111	0	4
6698326	post-training	diagnostic feature	112	1	4
6698326	post-training	diagnostic feature	113	1	5
6698326	post-training	diagnostic feature	114	1	4
6698326	post-training	diagnostic feature	115	1	5
6698326	post-training	diagnostic feature	116	0	4
6698326	post-training	diagnostic feature	117	0	5
6698326	post-training	diagnostic feature	118	0	4
6698326	post-training	diagnostic feature	119	0	1
6698326	post-training	diagnostic feature	120	1	5
6698326	post-training	diagnostic feature	121	0	4
6698326	post-training	diagnostic feature	122	0	3
6698326	post-training	diagnostic feature	123	0	4
6698326	post-training	diagnostic feature	124	0	5
6698326	post-training	diagnostic feature	125	0	1
6698326	post-training	diagnostic feature	126	1	4
6698326	post-training	diagnostic feature	127	0	4
6698326	post-training	diagnostic feature	128	1	5
6698326	post-training	diagnostic feature	129	0	2
6698326	post-training	diagnostic feature	130	1	5
6698326	post-training	diagnostic feature	131	1	5
6698326	post-training	diagnostic feature	132	1	5
6698326	post-training	diagnostic feature	133	1	4
6698326	post-training	diagnostic feature	134	1	5
6698326	post-training	diagnostic feature	135	1	5
6698326	post-training	diagnostic feature	136	0	5
6698326	post-training	diagnostic feature	137	1	3
6698326	post-training	diagnostic feature	138	1	5
6698326	post-training	diagnostic feature	139	0	4
6698326	post-training	diagnostic feature	140	1	5
6698326	post-training	diagnostic feature	141	0	3
6698326	post-training	diagnostic feature	142	0	0
6698326	post-training	diagnostic feature	143	0	5
6698326	post-training	diagnostic feature	144	0	5
6698326	post-training	diagnostic feature	145	1	5
6698326	post-training	diagnostic feature	146	1	5
6698326	post-training	diagnostic feature	147	0	3
6698326	post-training	diagnostic feature	148	1	4
6698326	post-training	diagnostic feature	149	1	4
6698326	post-training	diagnostic feature	150	1	3
6698326	post-training	diagnostic feature	151	1	5
6698326	post-training	diagnostic feature	152	1	4
6698326	post-training	diagnostic feature	153	0	4
6698326	post-training	diagnostic feature	154	1	5
6698326	post-training	diagnostic feature	155	1	5
6698326	post-training	diagnostic feature	156	1	4
6698326	post-training	diagnostic feature	157	0	0
6698326	post-training	diagnostic feature	158	0	4
6698326	post-training	diagnostic feature	159	1	4
6698326	post-training	diagnostic feature	160	1	5
6698326	post-training	diagnostic feature	161	1	3
6698326	post-training	diagnostic feature	162	1	5
6698326	post-training	diagnostic feature	163	1	4
6698326	post-training	diagnostic feature	164	1	5
6698326	post-training	diagnostic feature	165	0	5
6698326	post-training	diagnostic feature	166	0	4
6698326	post-training	diagnostic feature	167	0	4
6698326	post-training	diagnostic feature	168	1	4
6698326	pre-training	diagnostic feature	1	1	4
6698326	pre-training	diagnostic feature	2	0	4
6698326	pre-training	diagnostic feature	3	1	5
6698326	pre-training	diagnostic feature	4	1	5
6698326	pre-training	diagnostic feature	5	0	4
6698326	pre-training	diagnostic feature	6	1	5
6698326	pre-training	diagnostic feature	7	0	2
6698326	pre-training	diagnostic feature	8	1	4
6698326	pre-training	diagnostic feature	9	1	5
6698326	pre-training	diagnostic feature	10	1	5
6698326	pre-training	diagnostic feature	11	1	2
6698326	pre-training	diagnostic feature	12	1	4
6698326	pre-training	diagnostic feature	13	1	2
6698326	pre-training	diagnostic feature	14	1	5
6698326	pre-training	diagnostic feature	15	1	4
6698326	pre-training	diagnostic feature	16	0	4
6698326	pre-training	diagnostic feature	17	0	4
6698326	pre-training	diagnostic feature	18	0	4
6698326	pre-training	diagnostic feature	19	1	4
6698326	pre-training	diagnostic feature	20	1	5
6698326	pre-training	diagnostic feature	21	0	5
6698326	pre-training	diagnostic feature	22	0	3
6698326	pre-training	diagnostic feature	23	1	4
6698326	pre-training	diagnostic feature	24	1	0
6698326	pre-training	diagnostic feature	25	1	4
6698326	pre-training	diagnostic feature	26	1	5
6698326	pre-training	diagnostic feature	27	1	4
6698326	pre-training	diagnostic feature	28	1	5
6698326	pre-training	diagnostic feature	29	1	3
6698326	pre-training	diagnostic feature	30	1	5
6698326	pre-training	diagnostic feature	31	0	4
6698326	pre-training	diagnostic feature	32	1	5
6698326	pre-training	diagnostic feature	33	1	4
6698326	pre-training	diagnostic feature	34	0	4
6698326	pre-training	diagnostic feature	35	1	5
6698326	pre-training	diagnostic feature	36	0	4
6698326	pre-training	diagnostic feature	37	1	5
6698326	pre-training	diagnostic feature	38	1	5
6698326	pre-training	diagnostic feature	39	1	4
6698326	pre-training	diagnostic feature	40	1	2
6698326	pre-training	diagnostic feature	41	1	4
6698326	pre-training	diagnostic feature	42	1	5
6698326	pre-training	diagnostic feature	43	0	5
6698326	pre-training	diagnostic feature	44	1	5
6698326	pre-training	diagnostic feature	45	1	4
6698326	pre-training	diagnostic feature	46	0	4
6698326	pre-training	diagnostic feature	47	1	5
6698326	pre-training	diagnostic feature	48	1	4
6698326	pre-training	diagnostic feature	49	1	4
6698326	pre-training	diagnostic feature	50	1	4
6698326	pre-training	diagnostic feature	51	1	5
6698326	pre-training	diagnostic feature	52	1	4
6698326	pre-training	diagnostic feature	53	1	3
6698326	pre-training	diagnostic feature	54	1	5
6698326	pre-training	diagnostic feature	55	0	4
6698326	pre-training	diagnostic feature	56	1	5
6698326	pre-training	diagnostic feature	57	1	4
6698326	pre-training	diagnostic feature	58	1	3
6698326	pre-training	diagnostic feature	59	1	5
6698326	pre-training	diagnostic feature	60	1	4
6698326	pre-training	diagnostic feature	61	0	4
6698326	pre-training	diagnostic feature	62	1	4
6698326	pre-training	diagnostic feature	63	0	5
6698326	pre-training	diagnostic feature	64	1	5
6698326	pre-training	diagnostic feature	65	0	5
6698326	pre-training	diagnostic feature	66	1	5
6698326	pre-training	diagnostic feature	67	1	5
6698326	pre-training	diagnostic feature	68	1	5
6698326	pre-training	diagnostic feature	69	1	4
6698326	pre-training	diagnostic feature	70	1	3
6698326	pre-training	diagnostic feature	71	1	4
6698326	pre-training	diagnostic feature	72	1	4
6698326	pre-training	diagnostic feature	73	1	3
6698326	pre-training	diagnostic feature	74	1	5
6698326	pre-training	diagnostic feature	75	1	5
6698326	pre-training	diagnostic feature	76	1	5
6698326	pre-training	diagnostic feature	77	1	5
6698326	pre-training	diagnostic feature	78	0	5
6698326	pre-training	diagnostic feature	79	1	4
6698326	pre-training	diagnostic feature	80	1	4
6698326	pre-training	diagnostic feature	81	1	5
6698326	pre-training	diagnostic feature	82	1	4
6698326	pre-training	diagnostic feature	83	1	4
6698326	pre-training	diagnostic feature	84	1	4
6698328	post-training	diagnostic feature	1	1	5
6698328	post-training	diagnostic feature	2	0	5
6698328	post-training	diagnostic feature	3	0	5
6698328	post-training	diagnostic feature	4	0	5
6698328	post-training	diagnostic feature	5	0	5
6698328	post-training	diagnostic feature	6	1	4
6698328	post-training	diagnostic feature	7	0	5
6698328	post-training	diagnostic feature	8	1	5
6698328	post-training	diagnostic feature	9	1	4
6698328	post-training	diagnostic feature	10	0	5
6698328	post-training	diagnostic feature	11	0	5
6698328	post-training	diagnostic feature	12	0	3
6698328	post-training	diagnostic feature	13	0	3
6698328	post-training	diagnostic feature	14	0	5
6698328	post-training	diagnostic feature	15	1	2
6698328	post-training	diagnostic feature	16	0	5
6698328	post-training	diagnostic feature	17	1	5
6698328	post-training	diagnostic feature	18	0	5
6698328	post-training	diagnostic feature	19	1	5
6698328	post-training	diagnostic feature	20	0	5
6698328	post-training	diagnostic feature	21	0	5
6698328	post-training	diagnostic feature	22	1	4
6698328	post-training	diagnostic feature	23	1	4
6698328	post-training	diagnostic feature	24	0	5
6698328	post-training	diagnostic feature	25	0	5
6698328	post-training	diagnostic feature	26	0	4
6698328	post-training	diagnostic feature	27	0	5
6698328	post-training	diagnostic feature	28	0	4
6698328	post-training	diagnostic feature	29	1	4
6698328	post-training	diagnostic feature	30	0	4
6698328	post-training	diagnostic feature	31	0	5
6698328	post-training	diagnostic feature	32	0	5
6698328	post-training	diagnostic feature	33	0	4
6698328	post-training	diagnostic feature	34	0	5
6698328	post-training	diagnostic feature	35	1	2
6698328	post-training	diagnostic feature	36	0	4
6698328	post-training	diagnostic feature	37	0	5
6698328	post-training	diagnostic feature	38	1	2
6698328	post-training	diagnostic feature	39	1	1
6698328	post-training	diagnostic feature	40	0	5
6698328	post-training	diagnostic feature	41	1	3
6698328	post-training	diagnostic feature	42	0	5
6698328	post-training	diagnostic feature	43	1	5
6698328	post-training	diagnostic feature	44	1	5
6698328	post-training	diagnostic feature	45	0	3
6698328	post-training	diagnostic feature	46	1	5
6698328	post-training	diagnostic feature	47	1	5
6698328	post-training	diagnostic feature	48	1	4
6698328	post-training	diagnostic feature	49	1	5
6698328	post-training	diagnostic feature	50	1	5
6698328	post-training	diagnostic feature	51	0	5
6698328	post-training	diagnostic feature	52	1	5
6698328	post-training	diagnostic feature	53	1	5
6698328	post-training	diagnostic feature	54	1	4
6698328	post-training	diagnostic feature	55	1	5
6698328	post-training	diagnostic feature	56	1	5
6698328	post-training	diagnostic feature	57	1	5
6698328	post-training	diagnostic feature	58	1	4
6698328	post-training	diagnostic feature	59	1	5
6698328	post-training	diagnostic feature	60	1	5
6698328	post-training	diagnostic feature	61	1	4
6698328	post-training	diagnostic feature	62	1	4
6698328	post-training	diagnostic feature	63	1	5
6698328	post-training	diagnostic feature	64	1	5
6698328	post-training	diagnostic feature	65	1	5
6698328	post-training	diagnostic feature	66	1	4
6698328	post-training	diagnostic feature	67	1	5
6698328	post-training	diagnostic feature	68	1	5
6698328	post-training	diagnostic feature	69	1	5
6698328	post-training	diagnostic feature	70	1	5
6698328	post-training	diagnostic feature	71	1	5
6698328	post-training	diagnostic feature	72	1	5
6698328	post-training	diagnostic feature	73	1	5
6698328	post-training	diagnostic feature	74	1	5
6698328	post-training	diagnostic feature	75	0	3
6698328	post-training	diagnostic feature	76	1	5
6698328	post-training	diagnostic feature	77	1	5
6698328	post-training	diagnostic feature	78	1	5
6698328	post-training	diagnostic feature	79	1	5
6698328	post-training	diagnostic feature	80	1	4
6698328	post-training	diagnostic feature	81	1	5
6698328	post-training	diagnostic feature	82	1	5
6698328	post-training	diagnostic feature	83	1	5
6698328	post-training	diagnostic feature	84	0	4
6698328	pre-training	diagnostic feature	85	0	5
6698328	pre-training	diagnostic feature	86	1	0
6698328	pre-training	diagnostic feature	87	0	5
6698328	pre-training	diagnostic feature	88	0	4
6698328	pre-training	diagnostic feature	89	1	3
6698328	pre-training	diagnostic feature	90	0	1
6698328	pre-training	diagnostic feature	91	1	2
6698328	pre-training	diagnostic feature	92	0	5
6698328	pre-training	diagnostic feature	93	0	5
6698328	pre-training	diagnostic feature	94	1	5
6698328	pre-training	diagnostic feature	95	0	4
6698328	pre-training	diagnostic feature	96	1	4
6698328	pre-training	diagnostic feature	97	0	5
6698328	pre-training	diagnostic feature	98	0	4
6698328	pre-training	diagnostic feature	99	0	4
6698328	pre-training	diagnostic feature	100	0	4
6698328	pre-training	diagnostic feature	101	0	4
6698328	pre-training	diagnostic feature	102	0	5
6698328	pre-training	diagnostic feature	103	0	5
6698328	pre-training	diagnostic feature	104	1	4
6698328	pre-training	diagnostic feature	105	0	4
6698328	pre-training	diagnostic feature	106	1	2
6698328	pre-training	diagnostic feature	107	0	4
6698328	pre-training	diagnostic feature	108	0	4
6698328	pre-training	diagnostic feature	109	0	5
6698328	pre-training	diagnostic feature	110	0	5
6698328	pre-training	diagnostic feature	111	0	5
6698328	pre-training	diagnostic feature	112	0	4
6698328	pre-training	diagnostic feature	113	0	4
6698328	pre-training	diagnostic feature	114	0	5
6698328	pre-training	diagnostic feature	115	1	4
6698328	pre-training	diagnostic feature	116	0	4
6698328	pre-training	diagnostic feature	117	0	4
6698328	pre-training	diagnostic feature	118	0	4
6698328	pre-training	diagnostic feature	119	0	4
6698328	pre-training	diagnostic feature	120	0	4
6698328	pre-training	diagnostic feature	121	1	3
6698328	pre-training	diagnostic feature	122	0	5
6698328	pre-training	diagnostic feature	123	0	5
6698328	pre-training	diagnostic feature	124	0	4
6698328	pre-training	diagnostic feature	125	0	4
6698328	pre-training	diagnostic feature	126	1	4
6698328	pre-training	diagnostic feature	127	1	5
6698328	pre-training	diagnostic feature	128	1	4
6698328	pre-training	diagnostic feature	129	1	5
6698328	pre-training	diagnostic feature	130	1	4
6698328	pre-training	diagnostic feature	131	0	3
6698328	pre-training	diagnostic feature	132	1	5
6698328	pre-training	diagnostic feature	133	1	4
6698328	pre-training	diagnostic feature	134	1	3
6698328	pre-training	diagnostic feature	135	1	4
6698328	pre-training	diagnostic feature	136	0	4
6698328	pre-training	diagnostic feature	137	1	5
6698328	pre-training	diagnostic feature	138	1	4
6698328	pre-training	diagnostic feature	139	1	5
6698328	pre-training	diagnostic feature	140	1	5
6698328	pre-training	diagnostic feature	141	1	4
6698328	pre-training	diagnostic feature	142	1	4
6698328	pre-training	diagnostic feature	143	1	4
6698328	pre-training	diagnostic feature	144	1	4
6698328	pre-training	diagnostic feature	145	1	5
6698328	pre-training	diagnostic feature	146	1	5
6698328	pre-training	diagnostic feature	147	1	5
6698328	pre-training	diagnostic feature	148	1	5
6698328	pre-training	diagnostic feature	149	1	5
6698328	pre-training	diagnostic feature	150	1	5
6698328	pre-training	diagnostic feature	151	1	4
6698328	pre-training	diagnostic feature	152	1	4
6698328	pre-training	diagnostic feature	153	1	3
6698328	pre-training	diagnostic feature	154	1	1
6698328	pre-training	diagnostic feature	155	1	5
6698328	pre-training	diagnostic feature	156	1	5
6698328	pre-training	diagnostic feature	157	0	0
6698328	pre-training	diagnostic feature	158	1	4
6698328	pre-training	diagnostic feature	159	1	4
6698328	pre-training	diagnostic feature	160	1	4
6698328	pre-training	diagnostic feature	161	1	4
6698328	pre-training	diagnostic feature	162	1	5
6698328	pre-training	diagnostic feature	163	1	5
6698328	pre-training	diagnostic feature	164	1	3
6698328	pre-training	diagnostic feature	165	1	5
6698328	pre-training	diagnostic feature	166	1	4
6698328	pre-training	diagnostic feature	167	1	5
6698328	pre-training	diagnostic feature	168	0	1
6698329	post-training	diagnostic feature	1	1	1
6698329	post-training	diagnostic feature	2	1	4
6698329	post-training	diagnostic feature	3	1	4
6698329	post-training	diagnostic feature	4	1	4
6698329	post-training	diagnostic feature	5	0	5
6698329	post-training	diagnostic feature	6	1	1
6698329	post-training	diagnostic feature	7	1	5
6698329	post-training	diagnostic feature	8	1	4
6698329	post-training	diagnostic feature	9	1	1
6698329	post-training	diagnostic feature	10	1	4
6698329	post-training	diagnostic feature	11	1	5
6698329	post-training	diagnostic feature	12	1	5
6698329	post-training	diagnostic feature	13	1	1
6698329	post-training	diagnostic feature	14	1	4
6698329	post-training	diagnostic feature	15	1	4
6698329	post-training	diagnostic feature	16	1	3
6698329	post-training	diagnostic feature	17	1	4
6698329	post-training	diagnostic feature	18	1	4
6698329	post-training	diagnostic feature	19	1	5
6698329	post-training	diagnostic feature	20	1	1
6698329	post-training	diagnostic feature	21	1	4
6698329	post-training	diagnostic feature	22	1	5
6698329	post-training	diagnostic feature	23	1	1
6698329	post-training	diagnostic feature	24	0	4
6698329	post-training	diagnostic feature	25	1	4
6698329	post-training	diagnostic feature	26	1	4
6698329	post-training	diagnostic feature	27	1	1
6698329	post-training	diagnostic feature	28	1	1
6698329	post-training	diagnostic feature	29	1	4
6698329	post-training	diagnostic feature	30	1	4
6698329	post-training	diagnostic feature	31	1	1
6698329	post-training	diagnostic feature	32	1	1
6698329	post-training	diagnostic feature	33	1	1
6698329	post-training	diagnostic feature	34	1	4
6698329	post-training	diagnostic feature	35	1	4
6698329	post-training	diagnostic feature	36	1	1
6698329	post-training	diagnostic feature	37	1	5
6698329	post-training	diagnostic feature	38	1	5
6698329	post-training	diagnostic feature	39	1	4
6698329	post-training	diagnostic feature	40	1	1
6698329	post-training	diagnostic feature	41	1	1
6698329	post-training	diagnostic feature	42	1	4
6698329	post-training	diagnostic feature	43	1	4
6698329	post-training	diagnostic feature	44	1	4
6698329	post-training	diagnostic feature	45	1	4
6698329	post-training	diagnostic feature	46	0	4
6698329	post-training	diagnostic feature	47	1	1
6698329	post-training	diagnostic feature	48	1	1
6698329	post-training	diagnostic feature	49	1	4
6698329	post-training	diagnostic feature	50	1	4
6698329	post-training	diagnostic feature	51	0	5
6698329	post-training	diagnostic feature	52	1	4
6698329	post-training	diagnostic feature	53	1	3
6698329	post-training	diagnostic feature	54	1	4
6698329	post-training	diagnostic feature	55	0	1
6698329	post-training	diagnostic feature	56	1	4
6698329	post-training	diagnostic feature	57	1	4
6698329	post-training	diagnostic feature	58	1	4
6698329	post-training	diagnostic feature	59	1	4
6698329	post-training	diagnostic feature	60	1	4
6698329	post-training	diagnostic feature	61	1	4
6698329	post-training	diagnostic feature	62	1	4
6698329	post-training	diagnostic feature	63	0	0
6698329	post-training	diagnostic feature	64	1	4
6698329	post-training	diagnostic feature	65	1	4
6698329	post-training	diagnostic feature	66	1	4
6698329	post-training	diagnostic feature	67	1	4
6698329	post-training	diagnostic feature	68	1	4
6698329	post-training	diagnostic feature	69	1	4
6698329	post-training	diagnostic feature	70	1	4
6698329	post-training	diagnostic feature	71	1	4
6698329	post-training	diagnostic feature	72	0	3
6698329	post-training	diagnostic feature	73	1	4
6698329	post-training	diagnostic feature	74	1	4
6698329	post-training	diagnostic feature	75	1	5
6698329	post-training	diagnostic feature	76	1	4
6698329	post-training	diagnostic feature	77	0	1
6698329	post-training	diagnostic feature	78	1	4
6698329	post-training	diagnostic feature	79	1	4
6698329	post-training	diagnostic feature	80	1	4
6698329	post-training	diagnostic feature	81	1	5
6698329	post-training	diagnostic feature	82	1	4
6698329	post-training	diagnostic feature	83	1	4
6698329	post-training	diagnostic feature	84	1	4
6698329	pre-training	diagnostic feature	85	1	4
6698329	pre-training	diagnostic feature	86	1	4
6698329	pre-training	diagnostic feature	87	1	4
6698329	pre-training	diagnostic feature	88	1	4
6698329	pre-training	diagnostic feature	89	1	0
6698329	pre-training	diagnostic feature	90	1	4
6698329	pre-training	diagnostic feature	91	1	4
6698329	pre-training	diagnostic feature	92	1	1
6698329	pre-training	diagnostic feature	93	0	4
6698329	pre-training	diagnostic feature	94	1	1
6698329	pre-training	diagnostic feature	95	1	4
6698329	pre-training	diagnostic feature	96	1	4
6698329	pre-training	diagnostic feature	97	1	1
6698329	pre-training	diagnostic feature	98	0	4
6698329	pre-training	diagnostic feature	99	1	4
6698329	pre-training	diagnostic feature	100	1	1
6698329	pre-training	diagnostic feature	101	1	4
6698329	pre-training	diagnostic feature	102	0	4
6698329	pre-training	diagnostic feature	103	1	4
6698329	pre-training	diagnostic feature	104	1	4
6698329	pre-training	diagnostic feature	105	1	4
6698329	pre-training	diagnostic feature	106	0	5
6698329	pre-training	diagnostic feature	107	1	4
6698329	pre-training	diagnostic feature	108	1	1
6698329	pre-training	diagnostic feature	109	0	4
6698329	pre-training	diagnostic feature	110	1	3
6698329	pre-training	diagnostic feature	111	1	1
6698329	pre-training	diagnostic feature	112	1	0
6698329	pre-training	diagnostic feature	113	0	4
6698329	pre-training	diagnostic feature	114	1	0
6698329	pre-training	diagnostic feature	115	1	4
6698329	pre-training	diagnostic feature	116	1	4
6698329	pre-training	diagnostic feature	117	1	4
6698329	pre-training	diagnostic feature	118	1	0
6698329	pre-training	diagnostic feature	119	0	4
6698329	pre-training	diagnostic feature	120	1	4
6698329	pre-training	diagnostic feature	121	1	4
6698329	pre-training	diagnostic feature	122	1	4
6698329	pre-training	diagnostic feature	123	1	3
6698329	pre-training	diagnostic feature	124	1	4
6698329	pre-training	diagnostic feature	125	0	4
6698329	pre-training	diagnostic feature	126	1	4
6698329	pre-training	diagnostic feature	127	1	4
6698329	pre-training	diagnostic feature	128	1	4
6698329	pre-training	diagnostic feature	129	1	4
6698329	pre-training	diagnostic feature	130	1	4
6698329	pre-training	diagnostic feature	131	1	4
6698329	pre-training	diagnostic feature	132	1	5
6698329	pre-training	diagnostic feature	133	1	5
6698329	pre-training	diagnostic feature	134	1	4
6698329	pre-training	diagnostic feature	135	1	4
6698329	pre-training	diagnostic feature	136	1	5
6698329	pre-training	diagnostic feature	137	1	5
6698329	pre-training	diagnostic feature	138	0	4
6698329	pre-training	diagnostic feature	139	1	4
6698329	pre-training	diagnostic feature	140	1	4
6698329	pre-training	diagnostic feature	141	1	4
6698329	pre-training	diagnostic feature	142	1	5
6698329	pre-training	diagnostic feature	143	1	4
6698329	pre-training	diagnostic feature	144	1	4
6698329	pre-training	diagnostic feature	145	1	4
6698329	pre-training	diagnostic feature	146	1	5
6698329	pre-training	diagnostic feature	147	1	5
6698329	pre-training	diagnostic feature	148	1	5
6698329	pre-training	diagnostic feature	149	1	4
6698329	pre-training	diagnostic feature	150	1	4
6698329	pre-training	diagnostic feature	151	1	5
[truncated: 34,961 more rows]

## Sheet: Predicting GFMT2-SA responses
PID	Self-assessed ability (PI20)	Objective ability (GFMT2-SA)	Trial number	Trial accuracy	Trial confidence
6694794	-13.7727	0.0497727	1	0	4
6694794	-13.7727	0.0497727	2	0	3
6694794	-13.7727	0.0497727	3	0	2
6694794	-13.7727	0.0497727	4	0	3
6694794	-13.7727	0.0497727	5	1	2
6694794	-13.7727	0.0497727	6	1	2
6694794	-13.7727	0.0497727	7	1	3
6694794	-13.7727	0.0497727	8	1	3
6694794	-13.7727	0.0497727	9	1	3
6694794	-13.7727	0.0497727	10	0	3
6694794	-13.7727	0.0497727	11	1	4
6694794	-13.7727	0.0497727	12	1	4
6694794	-13.7727	0.0497727	13	1	3
6694794	-13.7727	0.0497727	14	1	1
6694794	-13.7727	0.0497727	15	1	3
6694794	-13.7727	0.0497727	16	0	3
6694794	-13.7727	0.0497727	17	1	2
6694794	-13.7727	0.0497727	18	1	4
6694794	-13.7727	0.0497727	19	0	2
6694794	-13.7727	0.0497727	20	1	4
6694794	-13.7727	0.0497727	21	1	3
6694794	-13.7727	0.0497727	22	1	3
6694794	-13.7727	0.0497727	23	0	3
6694794	-13.7727	0.0497727	24	1	4
6694794	-13.7727	0.0497727	25	1	4
6694794	-13.7727	0.0497727	26	1	4
6694794	-13.7727	0.0497727	27	1	3
6694794	-13.7727	0.0497727	28	1	3
6694794	-13.7727	0.0497727	29	1	3
6694794	-13.7727	0.0497727	30	1	4
6694794	-13.7727	0.0497727	31	1	4
6694794	-13.7727	0.0497727	32	1	4
6694794	-13.7727	0.0497727	33	1	4
6694794	-13.7727	0.0497727	34	1	3
6694794	-13.7727	0.0497727	35	1	3
6694794	-13.7727	0.0497727	36	1	4
6694794	-13.7727	0.0497727	37	1	3
6694794	-13.7727	0.0497727	38	1	4
6694794	-13.7727	0.0497727	39	1	2
6694794	-13.7727	0.0497727	40	1	4
6694909	21.2273	0.0247727	1	0	2
6694909	21.2273	0.0247727	2	1	3
6694909	21.2273	0.0247727	3	0	3
6694909	21.2273	0.0247727	4	1	2
6694909	21.2273	0.0247727	5	1	4
6694909	21.2273	0.0247727	6	1	4
6694909	21.2273	0.0247727	7	1	2
6694909	21.2273	0.0247727	8	0	3
6694909	21.2273	0.0247727	9	1	4
6694909	21.2273	0.0247727	10	1	5
6694909	21.2273	0.0247727	11	1	4
6694909	21.2273	0.0247727	12	0	4
6694909	21.2273	0.0247727	13	1	4
6694909	21.2273	0.0247727	14	1	4
6694909	21.2273	0.0247727	15	0	3
6694909	21.2273	0.0247727	16	1	4
6694909	21.2273	0.0247727	17	1	4
6694909	21.2273	0.0247727	18	1	3
6694909	21.2273	0.0247727	19	1	3
6694909	21.2273	0.0247727	20	1	5
6694909	21.2273	0.0247727	21	0	3
6694909	21.2273	0.0247727	22	1	4
6694909	21.2273	0.0247727	23	1	4
6694909	21.2273	0.0247727	24	1	3
6694909	21.2273	0.0247727	25	1	3
6694909	21.2273	0.0247727	26	1	4
6694909	21.2273	0.0247727	27	1	4
6694909	21.2273	0.0247727	28	1	3
6694909	21.2273	0.0247727	29	1	5
6694909	21.2273	0.0247727	30	0	2
6694909	21.2273	0.0247727	31	1	2
6694909	21.2273	0.0247727	32	1	4
6694909	21.2273	0.0247727	33	1	4
6694909	21.2273	0.0247727	34	1	4
6694909	21.2273	0.0247727	35	1	4
6694909	21.2273	0.0247727	36	0	2
6694909	21.2273	0.0247727	37	0	2
6694909	21.2273	0.0247727	38	1	2
6694909	21.2273	0.0247727	39	1	4
6694909	21.2273	0.0247727	40	1	4
6694929	-8.77273	0.0247727	1	0	4
6694929	-8.77273	0.0247727	2	1	4
6694929	-8.77273	0.0247727	3	1	4
6694929	-8.77273	0.0247727	4	1	5
6694929	-8.77273	0.0247727	5	0	4
6694929	-8.77273	0.0247727	6	1	4
6694929	-8.77273	0.0247727	7	1	0
6694929	-8.77273	0.0247727	8	1	3
6694929	-8.77273	0.0247727	9	1	3
6694929	-8.77273	0.0247727	10	1	4
6694929	-8.77273	0.0247727	11	1	4
6694929	-8.77273	0.0247727	12	1	4
6694929	-8.77273	0.0247727	13	1	5
6694929	-8.77273	0.0247727	14	1	3
6694929	-8.77273	0.0247727	15	1	4
6694929	-8.77273	0.0247727	16	0	1
6694929	-8.77273	0.0247727	17	1	4
6694929	-8.77273	0.0247727	18	1	4
6694929	-8.77273	0.0247727	19	1	4
6694929	-8.77273	0.0247727	20	1	4
6694929	-8.77273	0.0247727	21	1	4
6694929	-8.77273	0.0247727	22	1	3
6694929	-8.77273	0.0247727	23	0	3
6694929	-8.77273	0.0247727	24	1	2
6694929	-8.77273	0.0247727	25	1	4
6694929	-8.77273	0.0247727	26	1	4
6694929	-8.77273	0.0247727	27	1	4
6694929	-8.77273	0.0247727	28	0	4
6694929	-8.77273	0.0247727	29	1	1
6694929	-8.77273	0.0247727	30	1	3
6694929	-8.77273	0.0247727	31	0	4
6694929	-8.77273	0.0247727	32	1	3
6694929	-8.77273	0.0247727	33	0	1
6694929	-8.77273	0.0247727	34	0	1
6694929	-8.77273	0.0247727	35	0	4
6694929	-8.77273	0.0247727	36	1	2
6694929	-8.77273	0.0247727	37	1	4
6694929	-8.77273	0.0247727	38	1	2
6694929	-8.77273	0.0247727	39	1	4
6694929	-8.77273	0.0247727	40	1	4
6694935	10.2273	-0.0502273	1	0	2
6694935	10.2273	-0.0502273	2	1	1
6694935	10.2273	-0.0502273	3	1	5
6694935	10.2273	-0.0502273	4	1	4
6694935	10.2273	-0.0502273	5	1	4
6694935	10.2273	-0.0502273	6	1	3
6694935	10.2273	-0.0502273	7	1	4
6694935	10.2273	-0.0502273	8	0	4
6694935	10.2273	-0.0502273	9	1	5
6694935	10.2273	-0.0502273	10	1	3
6694935	10.2273	-0.0502273	11	0	4
6694935	10.2273	-0.0502273	12	1	5
6694935	10.2273	-0.0502273	13	1	4
6694935	10.2273	-0.0502273	14	1	5
6694935	10.2273	-0.0502273	15	0	5
6694935	10.2273	-0.0502273	16	0	3
6694935	10.2273	-0.0502273	17	1	5
6694935	10.2273	-0.0502273	18	1	5
6694935	10.2273	-0.0502273	19	1	2
6694935	10.2273	-0.0502273	20	1	5
6694935	10.2273	-0.0502273	21	1	4
6694935	10.2273	-0.0502273	22	1	4
6694935	10.2273	-0.0502273	23	0	4
6694935	10.2273	-0.0502273	24	1	4
6694935	10.2273	-0.0502273	25	1	4
6694935	10.2273	-0.0502273	26	1	5
6694935	10.2273	-0.0502273	27	1	4
6694935	10.2273	-0.0502273	28	1	4
6694935	10.2273	-0.0502273	29	1	4
6694935	10.2273	-0.0502273	30	0	5
6694935	10.2273	-0.0502273	31	0	5
6694935	10.2273	-0.0502273	32	1	0
6694935	10.2273	-0.0502273	33	0	5
6694935	10.2273	-0.0502273	34	1	3
6694935	10.2273	-0.0502273	35	1	4
6694935	10.2273	-0.0502273	36	1	3
6694935	10.2273	-0.0502273	37	0	4
6694935	10.2273	-0.0502273	38	1	4
6694935	10.2273	-0.0502273	39	0	4
6694935	10.2273	-0.0502273	40	0	4
6694941	-14.7727	0.0497727	1	1	5
6694941	-14.7727	0.0497727	2	1	5
6694941	-14.7727	0.0497727	3	1	5
6694941	-14.7727	0.0497727	4	0	5
6694941	-14.7727	0.0497727	5	1	5
6694941	-14.7727	0.0497727	6	1	5
6694941	-14.7727	0.0497727	7	0	5
6694941	-14.7727	0.0497727	8	0	3
6694941	-14.7727	0.0497727	9	1	5
6694941	-14.7727	0.0497727	10	1	5
6694941	-14.7727	0.0497727	11	1	5
6694941	-14.7727	0.0497727	12	1	3
6694941	-14.7727	0.0497727	13	1	5
6694941	-14.7727	0.0497727	14	1	5
6694941	-14.7727	0.0497727	15	1	3
6694941	-14.7727	0.0497727	16	1	5
6694941	-14.7727	0.0497727	17	1	5
6694941	-14.7727	0.0497727	18	1	5
6694941	-14.7727	0.0497727	19	0	3
6694941	-14.7727	0.0497727	20	1	5
6694941	-14.7727	0.0497727	21	1	3
6694941	-14.7727	0.0497727	22	1	5
6694941	-14.7727	0.0497727	23	1	2
6694941	-14.7727	0.0497727	24	1	5
6694941	-14.7727	0.0497727	25	1	5
6694941	-14.7727	0.0497727	26	1	3
6694941	-14.7727	0.0497727	27	1	5
6694941	-14.7727	0.0497727	28	1	5
6694941	-14.7727	0.0497727	29	1	5
6694941	-14.7727	0.0497727	30	0	3
6694941	-14.7727	0.0497727	31	1	5
6694941	-14.7727	0.0497727	32	0	5
6694941	-14.7727	0.0497727	33	1	3
6694941	-14.7727	0.0497727	34	1	5
6694941	-14.7727	0.0497727	35	0	5
6694941	-14.7727	0.0497727	36	0	3
6694941	-14.7727	0.0497727	37	1	5
6694941	-14.7727	0.0497727	38	1	5
6694941	-14.7727	0.0497727	39	1	3
6694941	-14.7727	0.0497727	40	1	5
6695370	5.22727	-0.0252273	1	0	4
6695370	5.22727	-0.0252273	2	1	4
6695370	5.22727	-0.0252273	3	1	4
6695370	5.22727	-0.0252273	4	1	4
6695370	5.22727	-0.0252273	5	1	5
6695370	5.22727	-0.0252273	6	0	4
6695370	5.22727	-0.0252273	7	1	3
6695370	5.22727	-0.0252273	8	1	4
6695370	5.22727	-0.0252273	9	1	4
6695370	5.22727	-0.0252273	10	0	4
6695370	5.22727	-0.0252273	11	0	4
6695370	5.22727	-0.0252273	12	1	5
6695370	5.22727	-0.0252273	13	1	4
6695370	5.22727	-0.0252273	14	1	3
6695370	5.22727	-0.0252273	15	1	3
6695370	5.22727	-0.0252273	16	1	4
6695370	5.22727	-0.0252273	17	1	4
6695370	5.22727	-0.0252273	18	1	3
6695370	5.22727	-0.0252273	19	1	3
6695370	5.22727	-0.0252273	20	0	4
6695370	5.22727	-0.0252273	21	1	3
6695370	5.22727	-0.0252273	22	0	4
6695370	5.22727	-0.0252273	23	1	5
6695370	5.22727	-0.0252273	24	1	4
6695370	5.22727	-0.0252273	25	1	5
6695370	5.22727	-0.0252273	26	1	4
6695370	5.22727	-0.0252273	27	1	4
6695370	5.22727	-0.0252273	28	1	4
6695370	5.22727	-0.0252273	29	1	4
6695370	5.22727	-0.0252273	30	0	3
6695370	5.22727	-0.0252273	31	0	3
6695370	5.22727	-0.0252273	32	1	4
6695370	5.22727	-0.0252273	33	0	3
6695370	5.22727	-0.0252273	34	1	5
6695370	5.22727	-0.0252273	35	1	5
6695370	5.22727	-0.0252273	36	1	4
6695370	5.22727	-0.0252273	37	1	4
6695370	5.22727	-0.0252273	38	0	3
6695370	5.22727	-0.0252273	39	0	4
6695370	5.22727	-0.0252273	40	1	4
6698317	-11.7727	0.124773	1	1	4
6698317	-11.7727	0.124773	2	1	4
6698317	-11.7727	0.124773	3	1	5
6698317	-11.7727	0.124773	4	1	4
6698317	-11.7727	0.124773	5	1	4
6698317	-11.7727	0.124773	6	1	5
6698317	-11.7727	0.124773	7	1	4
6698317	-11.7727	0.124773	8	1	4
6698317	-11.7727	0.124773	9	1	4
6698317	-11.7727	0.124773	10	1	5
6698317	-11.7727	0.124773	11	1	4
6698317	-11.7727	0.124773	12	1	3
6698317	-11.7727	0.124773	13	1	4
6698317	-11.7727	0.124773	14	1	3
6698317	-11.7727	0.124773	15	1	5
6698317	-11.7727	0.124773	16	1	4
6698317	-11.7727	0.124773	17	1	4
6698317	-11.7727	0.124773	18	1	4
6698317	-11.7727	0.124773	19	1	3
6698317	-11.7727	0.124773	20	1	3
6698317	-11.7727	0.124773	21	1	5
6698317	-11.7727	0.124773	22	1	4
6698317	-11.7727	0.124773	23	1	3
6698317	-11.7727	0.124773	24	1	5
6698317	-11.7727	0.124773	25	1	4
6698317	-11.7727	0.124773	26	1	4
6698317	-11.7727	0.124773	27	1	5
6698317	-11.7727	0.124773	28	0	3
6698317	-11.7727	0.124773	29	1	4
6698317	-11.7727	0.124773	30	0	4
6698317	-11.7727	0.124773	31	1	5
6698317	-11.7727	0.124773	32	1	5
6698317	-11.7727	0.124773	33	0	3
6698317	-11.7727	0.124773	34	1	4
6698317	-11.7727	0.124773	35	1	4
6698317	-11.7727	0.124773	36	0	3
6698317	-11.7727	0.124773	37	1	3
6698317	-11.7727	0.124773	38	1	4
6698317	-11.7727	0.124773	39	1	4
6698317	-11.7727	0.124773	40	0	3
6698318	-17.7727	0.0747727	1	0	4
6698318	-17.7727	0.0747727	2	1	5
6698318	-17.7727	0.0747727	3	0	4
6698318	-17.7727	0.0747727	4	1	5
6698318	-17.7727	0.0747727	5	1	5
6698318	-17.7727	0.0747727	6	1	5
6698318	-17.7727	0.0747727	7	1	3
6698318	-17.7727	0.0747727	8	1	5
6698318	-17.7727	0.0747727	9	1	3
6698318	-17.7727	0.0747727	10	1	5
6698318	-17.7727	0.0747727	11	1	4
6698318	-17.7727	0.0747727	12	1	4
6698318	-17.7727	0.0747727	13	1	5
6698318	-17.7727	0.0747727	14	1	5
6698318	-17.7727	0.0747727	15	0	5
6698318	-17.7727	0.0747727	16	1	5
6698318	-17.7727	0.0747727	17	1	4
6698318	-17.7727	0.0747727	18	0	4
6698318	-17.7727	0.0747727	19	1	4
6698318	-17.7727	0.0747727	20	1	4
6698318	-17.7727	0.0747727	21	1	5
6698318	-17.7727	0.0747727	22	1	5
6698318	-17.7727	0.0747727	23	1	4
6698318	-17.7727	0.0747727	24	1	5
6698318	-17.7727	0.0747727	25	1	3
6698318	-17.7727	0.0747727	26	1	4
6698318	-17.7727	0.0747727	27	1	4
6698318	-17.7727	0.0747727	28	0	3
6698318	-17.7727	0.0747727	29	1	4
6698318	-17.7727	0.0747727	30	1	4
6698318	-17.7727	0.0747727	31	0	4
6698318	-17.7727	0.0747727	32	1	5
6698318	-17.7727	0.0747727	33	1	5
6698318	-17.7727	0.0747727	34	1	5
6698318	-17.7727	0.0747727	35	1	4
6698318	-17.7727	0.0747727	36	0	5
6698318	-17.7727	0.0747727	37	1	4
6698318	-17.7727	0.0747727	38	1	5
6698318	-17.7727	0.0747727	39	1	5
6698318	-17.7727	0.0747727	40	1	3
6698323	10.2273	0.124773	1	0	3
6698323	10.2273	0.124773	2	1	3
6698323	10.2273	0.124773	3	1	4
6698323	10.2273	0.124773	4	0	4
6698323	10.2273	0.124773	5	1	4
6698323	10.2273	0.124773	6	1	4
6698323	10.2273	0.124773	7	1	4
6698323	10.2273	0.124773	8	1	5
6698323	10.2273	0.124773	9	1	5
6698323	10.2273	0.124773	10	1	4
6698323	10.2273	0.124773	11	1	5
6698323	10.2273	0.124773	12	1	5
6698323	10.2273	0.124773	13	1	4
6698323	10.2273	0.124773	14	1	4
6698323	10.2273	0.124773	15	1	4
6698323	10.2273	0.124773	16	1	4
6698323	10.2273	0.124773	17	1	5
6698323	10.2273	0.124773	18	1	5
6698323	10.2273	0.124773	19	1	5
6698323	10.2273	0.124773	20	1	3
6698323	10.2273	0.124773	21	1	5
6698323	10.2273	0.124773	22	1	4
6698323	10.2273	0.124773	23	1	5
6698323	10.2273	0.124773	24	1	5
6698323	10.2273	0.124773	25	1	5
6698323	10.2273	0.124773	26	1	5
6698323	10.2273	0.124773	27	1	4
6698323	10.2273	0.124773	28	1	5
6698323	10.2273	0.124773	29	1	5
6698323	10.2273	0.124773	30	1	4
6698323	10.2273	0.124773	31	0	3
6698323	10.2273	0.124773	32	1	5
6698323	10.2273	0.124773	33	0	4
6698323	10.2273	0.124773	34	1	5
6698323	10.2273	0.124773	35	1	5
6698323	10.2273	0.124773	36	0	4
6698323	10.2273	0.124773	37	1	5
6698323	10.2273	0.124773	38	1	5
6698323	10.2273	0.124773	39	1	5
6698323	10.2273	0.124773	40	1	4
6698326	24.2273	0.0497727	1	1	2
6698326	24.2273	0.0497727	2	0	5
6698326	24.2273	0.0497727	3	0	4
6698326	24.2273	0.0497727	4	1	4
6698326	24.2273	0.0497727	5	1	5
6698326	24.2273	0.0497727	6	1	4
6698326	24.2273	0.0497727	7	1	4
6698326	24.2273	0.0497727	8	0	4
6698326	24.2273	0.0497727	9	1	5
6698326	24.2273	0.0497727	10	1	5
6698326	24.2273	0.0497727	11	1	3
6698326	24.2273	0.0497727	12	1	4
6698326	24.2273	0.0497727	13	1	4
6698326	24.2273	0.0497727	14	1	5
6698326	24.2273	0.0497727	15	1	5
6698326	24.2273	0.0497727	16	0	5
6698326	24.2273	0.0497727	17	1	4
6698326	24.2273	0.0497727	18	0	5
6698326	24.2273	0.0497727	19	1	3
6698326	24.2273	0.0497727	20	1	4
6698326	24.2273	0.0497727	21	1	5
6698326	24.2273	0.0497727	22	1	4
6698326	24.2273	0.0497727	23	1	5
6698326	24.2273	0.0497727	24	1	5
6698326	24.2273	0.0497727	25	1	4
6698326	24.2273	0.0497727	26	1	5
6698326	24.2273	0.0497727	27	1	5
6698326	24.2273	0.0497727	28	0	2
6698326	24.2273	0.0497727	29	1	5
6698326	24.2273	0.0497727	30	1	5
6698326	24.2273	0.0497727	31	1	4
6698326	24.2273	0.0497727	32	1	4
6698326	24.2273	0.0497727	33	0	5
6698326	24.2273	0.0497727	34	1	4
6698326	24.2273	0.0497727	35	1	3
6698326	24.2273	0.0497727	36	0	5
6698326	24.2273	0.0497727	37	1	4
6698326	24.2273	0.0497727	38	1	4
6698326	24.2273	0.0497727	39	1	4
6698326	24.2273	0.0497727	40	1	5
6698328	-29.7727	-0.0752273	1	1	3
6698328	-29.7727	-0.0752273	2	1	3
6698328	-29.7727	-0.0752273	3	0	2
6698328	-29.7727	-0.0752273	4	1	4
6698328	-29.7727	-0.0752273	5	1	4
6698328	-29.7727	-0.0752273	6	1	4
6698328	-29.7727	-0.0752273	7	1	4
6698328	-29.7727	-0.0752273	8	1	4
6698328	-29.7727	-0.0752273	9	0	2
6698328	-29.7727	-0.0752273	10	1	4
6698328	-29.7727	-0.0752273	11	1	5
6698328	-29.7727	-0.0752273	12	1	5
6698328	-29.7727	-0.0752273	13	0	1
6698328	-29.7727	-0.0752273	14	1	3
6698328	-29.7727	-0.0752273	15	1	4
6698328	-29.7727	-0.0752273	16	1	4
6698328	-29.7727	-0.0752273	17	1	4
6698328	-29.7727	-0.0752273	18	1	4
6698328	-29.7727	-0.0752273	19	1	3
6698328	-29.7727	-0.0752273	20	1	4
6698328	-29.7727	-0.0752273	21	0	4
6698328	-29.7727	-0.0752273	22	1	4
6698328	-29.7727	-0.0752273	23	1	2
6698328	-29.7727	-0.0752273	24	1	5
6698328	-29.7727	-0.0752273	25	1	3
6698328	-29.7727	-0.0752273	26	0	2
6698328	-29.7727	-0.0752273	27	1	5
6698328	-29.7727	-0.0752273	28	0	4
6698328	-29.7727	-0.0752273	29	1	4
6698328	-29.7727	-0.0752273	30	0	4
6698328	-29.7727	-0.0752273	31	0	4
6698328	-29.7727	-0.0752273	32	1	5
6698328	-29.7727	-0.0752273	33	0	4
6698328	-29.7727	-0.0752273	34	0	4
6698328	-29.7727	-0.0752273	35	1	4
6698328	-29.7727	-0.0752273	36	1	4
6698328	-29.7727	-0.0752273	37	0	3
6698328	-29.7727	-0.0752273	38	1	5
6698328	-29.7727	-0.0752273	39	0	4
6698328	-29.7727	-0.0752273	40	0	4
6698329	-3.77273	0.149773	1	0	4
6698329	-3.77273	0.149773	2	1	3
6698329	-3.77273	0.149773	3	1	5
6698329	-3.77273	0.149773	4	1	4
6698329	-3.77273	0.149773	5	0	3
6698329	-3.77273	0.149773	6	1	4
6698329	-3.77273	0.149773	7	0	4
6698329	-3.77273	0.149773	8	1	4
6698329	-3.77273	0.149773	9	0	3
6698329	-3.77273	0.149773	10	1	3
6698329	-3.77273	0.149773	11	1	4
6698329	-3.77273	0.149773	12	1	4
6698329	-3.77273	0.149773	13	1	3
6698329	-3.77273	0.149773	14	1	4
6698329	-3.77273	0.149773	15	1	5
6698329	-3.77273	0.149773	16	1	4
6698329	-3.77273	0.149773	17	1	4
6698329	-3.77273	0.149773	18	1	4
6698329	-3.77273	0.149773	19	1	3
6698329	-3.77273	0.149773	20	1	3
6698329	-3.77273	0.149773	21	1	4
6698329	-3.77273	0.149773	22	1	4
6698329	-3.77273	0.149773	23	1	3
6698329	-3.77273	0.149773	24	1	4
6698329	-3.77273	0.149773	25	1	4
6698329	-3.77273	0.149773	26	1	0
6698329	-3.77273	0.149773	27	1	4
6698329	-3.77273	0.149773	28	1	3
6698329	-3.77273	0.149773	29	1	0
6698329	-3.77273	0.149773	30	1	4
6698329	-3.77273	0.149773	31	1	4
6698329	-3.77273	0.149773	32	1	4
6698329	-3.77273	0.149773	33	1	4
6698329	-3.77273	0.149773	34	1	4
6698329	-3.77273	0.149773	35	1	3
6698329	-3.77273	0.149773	36	1	3
6698329	-3.77273	0.149773	37	1	4
6698329	-3.77273	0.149773	38	1	0
6698329	-3.77273	0.149773	39	1	3
6698329	-3.77273	0.149773	40	1	4
6698330	-17.7727	0.0997727	1	1	5
6698330	-17.7727	0.0997727	2	1	5
6698330	-17.7727	0.0997727	3	1	5
6698330	-17.7727	0.0997727	4	1	4
6698330	-17.7727	0.0997727	5	1	5
6698330	-17.7727	0.0997727	6	1	5
6698330	-17.7727	0.0997727	7	0	5
6698330	-17.7727	0.0997727	8	1	5
6698330	-17.7727	0.0997727	9	1	4
6698330	-17.7727	0.0997727	10	1	5
6698330	-17.7727	0.0997727	11	0	4
6698330	-17.7727	0.0997727	12	1	5
6698330	-17.7727	0.0997727	13	1	5
6698330	-17.7727	0.0997727	14	1	5
6698330	-17.7727	0.0997727	15	1	5
6698330	-17.7727	0.0997727	16	1	5
6698330	-17.7727	0.0997727	17	1	5
6698330	-17.7727	0.0997727	18	1	5
6698330	-17.7727	0.0997727	19	1	5
6698330	-17.7727	0.0997727	20	1	5
6698330	-17.7727	0.0997727	21	0	4
6698330	-17.7727	0.0997727	22	1	5
6698330	-17.7727	0.0997727	23	1	5
6698330	-17.7727	0.0997727	24	1	4
6698330	-17.7727	0.0997727	25	1	5
6698330	-17.7727	0.0997727	26	0	3
6698330	-17.7727	0.0997727	27	1	5
6698330	-17.7727	0.0997727	28	1	4
6698330	-17.7727	0.0997727	29	1	4
6698330	-17.7727	0.0997727	30	1	5
6698330	-17.7727	0.0997727	31	1	4
6698330	-17.7727	0.0997727	32	1	5
6698330	-17.7727	0.0997727	33	0	4
6698330	-17.7727	0.0997727	34	1	0
6698330	-17.7727	0.0997727	35	1	5
6698330	-17.7727	0.0997727	36	1	4
6698330	-17.7727	0.0997727	37	1	5
6698330	-17.7727	0.0997727	38	1	5
6698330	-17.7727	0.0997727	39	0	5
6698330	-17.7727	0.0997727	40	1	4
6698335	-3.77273	0.124773	1	1	5
6698335	-3.77273	0.124773	2	1	4
6698335	-3.77273	0.124773	3	0	5
6698335	-3.77273	0.124773	4	1	5
6698335	-3.77273	0.124773	5	1	5
6698335	-3.77273	0.124773	6	1	4
6698335	-3.77273	0.124773	7	1	5
6698335	-3.77273	0.124773	8	1	5
6698335	-3.77273	0.124773	9	1	5
6698335	-3.77273	0.124773	10	1	5
6698335	-3.77273	0.124773	11	1	5
6698335	-3.77273	0.124773	12	1	4
6698335	-3.77273	0.124773	13	0	5
6698335	-3.77273	0.124773	14	1	5
6698335	-3.77273	0.124773	15	1	5
6698335	-3.77273	0.124773	16	1	5
6698335	-3.77273	0.124773	17	1	5
6698335	-3.77273	0.124773	18	1	5
6698335	-3.77273	0.124773	19	1	5
6698335	-3.77273	0.124773	20	1	5
6698335	-3.77273	0.124773	21	1	5
6698335	-3.77273	0.124773	22	1	5
6698335	-3.77273	0.124773	23	1	5
6698335	-3.77273	0.124773	24	1	5
6698335	-3.77273	0.124773	25	1	4
6698335	-3.77273	0.124773	26	1	5
6698335	-3.77273	0.124773	27	1	5
6698335	-3.77273	0.124773	28	0	5
6698335	-3.77273	0.124773	29	1	5
6698335	-3.77273	0.124773	30	1	5
6698335	-3.77273	0.124773	31	1	5
6698335	-3.77273	0.124773	32	1	5
6698335	-3.77273	0.124773	33	1	5
6698335	-3.77273	0.124773	34	1	5
6698335	-3.77273	0.124773	35	1	5
6698335	-3.77273	0.124773	36	0	4
6698335	-3.77273	0.124773	37	1	5
6698335	-3.77273	0.124773	38	1	5
6698335	-3.77273	0.124773	39	0	5
6698335	-3.77273	0.124773	40	1	5
6698346	-15.7727	0.224773	1	1	2
6698346	-15.7727	0.224773	2	0	2
6698346	-15.7727	0.224773	3	1	2
6698346	-15.7727	0.224773	4	1	2
6698346	-15.7727	0.224773	5	1	0
6698346	-15.7727	0.224773	6	1	1
6698346	-15.7727	0.224773	7	1	5
6698346	-15.7727	0.224773	8	1	1
6698346	-15.7727	0.224773	9	1	4
6698346	-15.7727	0.224773	10	1	5
6698346	-15.7727	0.224773	11	1	3
6698346	-15.7727	0.224773	12	1	5
6698346	-15.7727	0.224773	13	1	5
6698346	-15.7727	0.224773	14	1	5
6698346	-15.7727	0.224773	15	1	5
6698346	-15.7727	0.224773	16	1	5
6698346	-15.7727	0.224773	17	1	1
6698346	-15.7727	0.224773	18	1	5
6698346	-15.7727	0.224773	19	1	1
6698346	-15.7727	0.224773	20	1	5
6698346	-15.7727	0.224773	21	1	3
6698346	-15.7727	0.224773	22	1	5
6698346	-15.7727	0.224773	23	1	4
6698346	-15.7727	0.224773	24	1	5
6698346	-15.7727	0.224773	25	1	3
6698346	-15.7727	0.224773	26	1	4
6698346	-15.7727	0.224773	27	1	4
6698346	-15.7727	0.224773	28	1	1
6698346	-15.7727	0.224773	29	1	5
6698346	-15.7727	0.224773	30	1	4
6698346	-15.7727	0.224773	31	1	4
6698346	-15.7727	0.224773	32	1	3
6698346	-15.7727	0.224773	33	1	4
6698346	-15.7727	0.224773	34	1	4
6698346	-15.7727	0.224773	35	1	4
6698346	-15.7727	0.224773	36	1	3
6698346	-15.7727	0.224773	37	1	3
6698346	-15.7727	0.224773	38	1	5
6698346	-15.7727	0.224773	39	1	4
6698346	-15.7727	0.224773	40	1	3
6698347	4.22727	0.0997727	1	1	2
6698347	4.22727	0.0997727	2	1	3
6698347	4.22727	0.0997727	3	1	3
6698347	4.22727	0.0997727	4	1	4
6698347	4.22727	0.0997727	5	1	2
6698347	4.22727	0.0997727	6	1	2
6698347	4.22727	0.0997727	7	1	3
6698347	4.22727	0.0997727	8	1	3
6698347	4.22727	0.0997727	9	1	5
6698347	4.22727	0.0997727	10	1	3
6698347	4.22727	0.0997727	11	1	5
6698347	4.22727	0.0997727	12	1	3
6698347	4.22727	0.0997727	13	1	5
6698347	4.22727	0.0997727	14	1	5
6698347	4.22727	0.0997727	15	1	3
6698347	4.22727	0.0997727	16	1	3
6698347	4.22727	0.0997727	17	1	5
6698347	4.22727	0.0997727	18	1	5
6698347	4.22727	0.0997727	19	1	5
6698347	4.22727	0.0997727	20	1	2
6698347	4.22727	0.0997727	21	1	5
6698347	4.22727	0.0997727	22	1	5
6698347	4.22727	0.0997727	23	0	3
6698347	4.22727	0.0997727	24	1	3
6698347	4.22727	0.0997727	25	1	5
6698347	4.22727	0.0997727	26	1	5
6698347	4.22727	0.0997727	27	1	3
6698347	4.22727	0.0997727	28	1	2
6698347	4.22727	0.0997727	29	1	3
6698347	4.22727	0.0997727	30	0	2
6698347	4.22727	0.0997727	31	1	0
6698347	4.22727	0.0997727	32	1	5
6698347	4.22727	0.0997727	33	0	2
6698347	4.22727	0.0997727	34	0	5
6698347	4.22727	0.0997727	35	0	4
6698347	4.22727	0.0997727	36	1	3
6698347	4.22727	0.0997727	37	1	3
6698347	4.22727	0.0997727	38	1	5
6698347	4.22727	0.0997727	39	1	4
6698347	4.22727	0.0997727	40	0	5
6698349	-11.7727	0.124773	1	1	2
6698349	-11.7727	0.124773	2	1	4
6698349	-11.7727	0.124773	3	1	4
6698349	-11.7727	0.124773	4	1	1
6698349	-11.7727	0.124773	5	0	2
6698349	-11.7727	0.124773	6	1	5
6698349	-11.7727	0.124773	7	1	4
6698349	-11.7727	0.124773	8	1	5
6698349	-11.7727	0.124773	9	1	3
6698349	-11.7727	0.124773	10	1	5
6698349	-11.7727	0.124773	11	1	1
6698349	-11.7727	0.124773	12	1	5
6698349	-11.7727	0.124773	13	0	1
6698349	-11.7727	0.124773	14	1	3
6698349	-11.7727	0.124773	15	1	3
6698349	-11.7727	0.124773	16	0	4
6698349	-11.7727	0.124773	17	1	5
6698349	-11.7727	0.124773	18	1	4
6698349	-11.7727	0.124773	19	1	5
6698349	-11.7727	0.124773	20	1	4
6698349	-11.7727	0.124773	21	1	5
6698349	-11.7727	0.124773	22	1	4
6698349	-11.7727	0.124773	23	0	3
6698349	-11.7727	0.124773	24	1	4
6698349	-11.7727	0.124773	25	1	5
6698349	-11.7727	0.124773	26	1	5
6698349	-11.7727	0.124773	27	1	5
6698349	-11.7727	0.124773	28	1	1
6698349	-11.7727	0.124773	29	1	5
6698349	-11.7727	0.124773	30	1	4
6698349	-11.7727	0.124773	31	1	5
6698349	-11.7727	0.124773	32	1	4
6698349	-11.7727	0.124773	33	1	2
6698349	-11.7727	0.124773	34	0	3
6698349	-11.7727	0.124773	35	1	5
6698349	-11.7727	0.124773	36	1	2
6698349	-11.7727	0.124773	37	1	4
6698349	-11.7727	0.124773	38	1	5
6698349	-11.7727	0.124773	39	1	4
6698349	-11.7727	0.124773	40	1	5
6698356	-3.77273	-0.0252273	1	1	5
6698356	-3.77273	-0.0252273	2	1	5
6698356	-3.77273	-0.0252273	3	0	4
6698356	-3.77273	-0.0252273	4	0	5
6698356	-3.77273	-0.0252273	5	1	5
6698356	-3.77273	-0.0252273	6	1	5
6698356	-3.77273	-0.0252273	7	1	5
6698356	-3.77273	-0.0252273	8	1	5
6698356	-3.77273	-0.0252273	9	1	4
6698356	-3.77273	-0.0252273	10	0	5
6698356	-3.77273	-0.0252273	11	0	5
6698356	-3.77273	-0.0252273	12	1	5
6698356	-3.77273	-0.0252273	13	1	5
6698356	-3.77273	-0.0252273	14	1	5
6698356	-3.77273	-0.0252273	15	1	5
6698356	-3.77273	-0.0252273	16	1	4
6698356	-3.77273	-0.0252273	17	1	5
6698356	-3.77273	-0.0252273	18	0	5
6698356	-3.77273	-0.0252273	19	1	4
6698356	-3.77273	-0.0252273	20	1	4
6698356	-3.77273	-0.0252273	21	0	4
6698356	-3.77273	-0.0252273	22	1	4
6698356	-3.77273	-0.0252273	23	1	5
6698356	-3.77273	-0.0252273	24	1	5
6698356	-3.77273	-0.0252273	25	0	3
6698356	-3.77273	-0.0252273	26	0	3
6698356	-3.77273	-0.0252273	27	1	4
6698356	-3.77273	-0.0252273	28	0	4
6698356	-3.77273	-0.0252273	29	1	5
6698356	-3.77273	-0.0252273	30	1	4
6698356	-3.77273	-0.0252273	31	1	4
6698356	-3.77273	-0.0252273	32	1	5
6698356	-3.77273	-0.0252273	33	1	4
6698356	-3.77273	-0.0252273	34	1	5
6698356	-3.77273	-0.0252273	35	1	4
6698356	-3.77273	-0.0252273	36	1	5
6698356	-3.77273	-0.0252273	37	1	5
6698356	-3.77273	-0.0252273	38	1	4
6698356	-3.77273	-0.0252273	39	0	4
6698356	-3.77273	-0.0252273	40	0	4
6698366	-10.7727	-0.0502273	1	1	4
6698366	-10.7727	-0.0502273	2	1	4
6698366	-10.7727	-0.0502273	3	1	4
6698366	-10.7727	-0.0502273	4	1	4
6698366	-10.7727	-0.0502273	5	0	3
6698366	-10.7727	-0.0502273	6	1	5
6698366	-10.7727	-0.0502273	7	1	4
6698366	-10.7727	-0.0502273	8	1	4
6698366	-10.7727	-0.0502273	9	1	4
6698366	-10.7727	-0.0502273	10	1	4
6698366	-10.7727	-0.0502273	11	0	4
6698366	-10.7727	-0.0502273	12	1	4
6698366	-10.7727	-0.0502273	13	0	4
6698366	-10.7727	-0.0502273	14	1	4
6698366	-10.7727	-0.0502273	15	1	4
6698366	-10.7727	-0.0502273	16	0	4
6698366	-10.7727	-0.0502273	17	1	4
6698366	-10.7727	-0.0502273	18	1	4
6698366	-10.7727	-0.0502273	19	1	4
6698366	-10.7727	-0.0502273	20	0	4
6698366	-10.7727	-0.0502273	21	1	4
6698366	-10.7727	-0.0502273	22	1	4
6698366	-10.7727	-0.0502273	23	0	4
6698366	-10.7727	-0.0502273	24	0	5
6698366	-10.7727	-0.0502273	25	1	4
6698366	-10.7727	-0.0502273	26	1	4
6698366	-10.7727	-0.0502273	27	1	4
6698366	-10.7727	-0.0502273	28	0	4
6698366	-10.7727	-0.0502273	29	1	4
6698366	-10.7727	-0.0502273	30	0	4
6698366	-10.7727	-0.0502273	31	1	4
6698366	-10.7727	-0.0502273	32	1	4
6698366	-10.7727	-0.0502273	33	0	4
6698366	-10.7727	-0.0502273	34	1	4
6698366	-10.7727	-0.0502273	35	1	4
6698366	-10.7727	-0.0502273	36	1	4
6698366	-10.7727	-0.0502273	37	1	4
6698366	-10.7727	-0.0502273	38	0	4
6698366	-10.7727	-0.0502273	39	0	4
6698366	-10.7727	-0.0502273	40	1	4
6698371	-28.7727	0.0997727	1	1	1
6698371	-28.7727	0.0997727	2	1	1
6698371	-28.7727	0.0997727	3	1	0
6698371	-28.7727	0.0997727	4	1	1
6698371	-28.7727	0.0997727	5	1	1
6698371	-28.7727	0.0997727	6	1	0
6698371	-28.7727	0.0997727	7	0	4
6698371	-28.7727	0.0997727	8	1	1
6698371	-28.7727	0.0997727	9	1	5
6698371	-28.7727	0.0997727	10	1	4
6698371	-28.7727	0.0997727	11	0	2
6698371	-28.7727	0.0997727	12	1	4
6698371	-28.7727	0.0997727	13	0	3
6698371	-28.7727	0.0997727	14	1	3
6698371	-28.7727	0.0997727	15	1	2
6698371	-28.7727	0.0997727	16	0	4
6698371	-28.7727	0.0997727	17	1	5
6698371	-28.7727	0.0997727	18	0	4
6698371	-28.7727	0.0997727	19	1	1
6698371	-28.7727	0.0997727	20	1	5
6698371	-28.7727	0.0997727	21	1	5
6698371	-28.7727	0.0997727	22	1	5
6698371	-28.7727	0.0997727	23	1	4
6698371	-28.7727	0.0997727	24	1	5
6698371	-28.7727	0.0997727	25	1	4
6698371	-28.7727	0.0997727	26	1	4
6698371	-28.7727	0.0997727	27	1	5
6698371	-28.7727	0.0997727	28	1	1
6698371	-28.7727	0.0997727	29	1	5
6698371	-28.7727	0.0997727	30	1	4
6698371	-28.7727	0.0997727	31	1	4
6698371	-28.7727	0.0997727	32	1	5
6698371	-28.7727	0.0997727	33	1	4
6698371	-28.7727	0.0997727	34	1	4
6698371	-28.7727	0.0997727	35	1	4
6698371	-28.7727	0.0997727	36	1	5
6698371	-28.7727	0.0997727	37	1	4
6698371	-28.7727	0.0997727	38	1	5
6698371	-28.7727	0.0997727	39	1	4
6698371	-28.7727	0.0997727	40	0	3
6698374	-1.77273	0.0747727	1	1	3
6698374	-1.77273	0.0747727	2	1	4
6698374	-1.77273	0.0747727	3	0	4
6698374	-1.77273	0.0747727	4	1	4
6698374	-1.77273	0.0747727	5	1	4
6698374	-1.77273	0.0747727	6	1	4
6698374	-1.77273	0.0747727	7	1	4
6698374	-1.77273	0.0747727	8	1	4
6698374	-1.77273	0.0747727	9	1	4
6698374	-1.77273	0.0747727	10	1	4
6698374	-1.77273	0.0747727	11	1	4
6698374	-1.77273	0.0747727	12	1	4
6698374	-1.77273	0.0747727	13	1	4
6698374	-1.77273	0.0747727	14	1	4
6698374	-1.77273	0.0747727	15	1	4
6698374	-1.77273	0.0747727	16	1	3
6698374	-1.77273	0.0747727	17	1	4
6698374	-1.77273	0.0747727	18	1	3
6698374	-1.77273	0.0747727	19	1	4
6698374	-1.77273	0.0747727	20	1	3
6698374	-1.77273	0.0747727	21	1	3
6698374	-1.77273	0.0747727	22	1	4
6698374	-1.77273	0.0747727	23	1	4
6698374	-1.77273	0.0747727	24	1	4
6698374	-1.77273	0.0747727	25	0	4
6698374	-1.77273	0.0747727	26	1	4
6698374	-1.77273	0.0747727	27	1	4
6698374	-1.77273	0.0747727	28	0	4
6698374	-1.77273	0.0747727	29	1	4
6698374	-1.77273	0.0747727	30	1	4
6698374	-1.77273	0.0747727	31	1	4
6698374	-1.77273	0.0747727	32	1	4
6698374	-1.77273	0.0747727	33	0	4
6698374	-1.77273	0.0747727	34	0	4
6698374	-1.77273	0.0747727	35	0	4
6698374	-1.77273	0.0747727	36	0	3
6698374	-1.77273	0.0747727	37	1	4
6698374	-1.77273	0.0747727	38	1	4
6698374	-1.77273	0.0747727	39	1	4
6698374	-1.77273	0.0747727	40	1	3
6698377	-28.7727	0.224773	1	1	5
6698377	-28.7727	0.224773	2	1	5
6698377	-28.7727	0.224773	3	1	5
6698377	-28.7727	0.224773	4	1	2
6698377	-28.7727	0.224773	5	1	5
6698377	-28.7727	0.224773	6	1	5
6698377	-28.7727	0.224773	7	1	5
6698377	-28.7727	0.224773	8	1	5
6698377	-28.7727	0.224773	9	0	1
6698377	-28.7727	0.224773	10	1	5
6698377	-28.7727	0.224773	11	1	5
6698377	-28.7727	0.224773	12	1	5
6698377	-28.7727	0.224773	13	1	5
6698377	-28.7727	0.224773	14	1	5
6698377	-28.7727	0.224773	15	1	5
6698377	-28.7727	0.224773	16	1	5
6698377	-28.7727	0.224773	17	1	5
6698377	-28.7727	0.224773	18	1	5
6698377	-28.7727	0.224773	19	1	5
6698377	-28.7727	0.224773	20	1	5
6698377	-28.7727	0.224773	21	1	5
6698377	-28.7727	0.224773	22	1	5
6698377	-28.7727	0.224773	23	1	5
6698377	-28.7727	0.224773	24	1	5
6698377	-28.7727	0.224773	25	1	5
6698377	-28.7727	0.224773	26	1	5
6698377	-28.7727	0.224773	27	1	5
6698377	-28.7727	0.224773	28	1	4
6698377	-28.7727	0.224773	29	1	5
6698377	-28.7727	0.224773	30	1	5
6698377	-28.7727	0.224773	31	1	5
6698377	-28.7727	0.224773	32	1	5
6698377	-28.7727	0.224773	33	1	5
6698377	-28.7727	0.224773	34	1	5
6698377	-28.7727	0.224773	35	1	5
6698377	-28.7727	0.224773	36	1	5
6698377	-28.7727	0.224773	37	1	5
6698377	-28.7727	0.224773	38	1	5
6698377	-28.7727	0.224773	39	1	5
6698377	-28.7727	0.224773	40	1	5
6698378	-8.77273	-0.000227273	1	0	5
6698378	-8.77273	-0.000227273	2	0	5
6698378	-8.77273	-0.000227273	3	1	4
6698378	-8.77273	-0.000227273	4	1	5
6698378	-8.77273	-0.000227273	5	1	4
6698378	-8.77273	-0.000227273	6	1	5
6698378	-8.77273	-0.000227273	7	0	4
6698378	-8.77273	-0.000227273	8	1	5
6698378	-8.77273	-0.000227273	9	1	5
6698378	-8.77273	-0.000227273	10	0	4
6698378	-8.77273	-0.000227273	11	1	5
6698378	-8.77273	-0.000227273	12	1	5
6698378	-8.77273	-0.000227273	13	0	4
6698378	-8.77273	-0.000227273	14	1	5
6698378	-8.77273	-0.000227273	15	0	5
6698378	-8.77273	-0.000227273	16	1	5
6698378	-8.77273	-0.000227273	17	0	5
6698378	-8.77273	-0.000227273	18	1	5
6698378	-8.77273	-0.000227273	19	1	5
6698378	-8.77273	-0.000227273	20	1	5
6698378	-8.77273	-0.000227273	21	0	4
6698378	-8.77273	-0.000227273	22	0	5
6698378	-8.77273	-0.000227273	23	1	5
6698378	-8.77273	-0.000227273	24	1	5
6698378	-8.77273	-0.000227273	25	1	5
6698378	-8.77273	-0.000227273	26	0	5
6698378	-8.77273	-0.000227273	27	1	5
6698378	-8.77273	-0.000227273	28	1	4
6698378	-8.77273	-0.000227273	29	1	5
6698378	-8.77273	-0.000227273	30	1	4
6698378	-8.77273	-0.000227273	31	1	5
6698378	-8.77273	-0.000227273	32	1	5
6698378	-8.77273	-0.000227273	33	1	4
6698378	-8.77273	-0.000227273	34	1	5
6698378	-8.77273	-0.000227273	35	1	4
6698378	-8.77273	-0.000227273	36	1	5
6698378	-8.77273	-0.000227273	37	1	5
6698378	-8.77273	-0.000227273	38	1	5
6698378	-8.77273	-0.000227273	39	1	5
6698378	-8.77273	-0.000227273	40	1	5
6698384	-8.77273	0.0747727	1	0	0
6698384	-8.77273	0.0747727	2	1	3
6698384	-8.77273	0.0747727	3	1	3
6698384	-8.77273	0.0747727	4	1	2
6698384	-8.77273	0.0747727	5	0	4
6698384	-8.77273	0.0747727	6	1	4
6698384	-8.77273	0.0747727	7	1	4
6698384	-8.77273	0.0747727	8	1	4
6698384	-8.77273	0.0747727	9	1	3
6698384	-8.77273	0.0747727	10	1	4
6698384	-8.77273	0.0747727	11	1	4
6698384	-8.77273	0.0747727	12	1	4
6698384	-8.77273	0.0747727	13	0	4
6698384	-8.77273	0.0747727	14	1	4
6698384	-8.77273	0.0747727	15	1	3
6698384	-8.77273	0.0747727	16	1	4
6698384	-8.77273	0.0747727	17	1	3
6698384	-8.77273	0.0747727	18	1	5
6698384	-8.77273	0.0747727	19	1	3
6698384	-8.77273	0.0747727	20	1	3
6698384	-8.77273	0.0747727	21	1	5
6698384	-8.77273	0.0747727	22	0	3
6698384	-8.77273	0.0747727	23	1	5
6698384	-8.77273	0.0747727	24	0	0
6698384	-8.77273	0.0747727	25	1	2
6698384	-8.77273	0.0747727	26	1	5
6698384	-8.77273	0.0747727	27	1	0
6698384	-8.77273	0.0747727	28	1	5
6698384	-8.77273	0.0747727	29	1	5
6698384	-8.77273	0.0747727	30	1	5
6698384	-8.77273	0.0747727	31	1	5
6698384	-8.77273	0.0747727	32	1	5
6698384	-8.77273	0.0747727	33	0	4
6698384	-8.77273	0.0747727	34	1	3
6698384	-8.77273	0.0747727	35	1	5
6698384	-8.77273	0.0747727	36	0	3
6698384	-8.77273	0.0747727	37	1	5
6698384	-8.77273	0.0747727	38	1	5
6698384	-8.77273	0.0747727	39	1	4
6698384	-8.77273	0.0747727	40	1	5
6698385	-16.7727	0.124773	1	0	2
6698385	-16.7727	0.124773	2	1	4
6698385	-16.7727	0.124773	3	1	3
6698385	-16.7727	0.124773	4	1	3
6698385	-16.7727	0.124773	5	1	3
6698385	-16.7727	0.124773	6	1	4
6698385	-16.7727	0.124773	7	1	2
6698385	-16.7727	0.124773	8	0	1
6698385	-16.7727	0.124773	9	1	1
6698385	-16.7727	0.124773	10	1	3
6698385	-16.7727	0.124773	11	1	1
6698385	-16.7727	0.124773	12	1	4
6698385	-16.7727	0.124773	13	0	3
6698385	-16.7727	0.124773	14	1	5
6698385	-16.7727	0.124773	15	0	3
6698385	-16.7727	0.124773	16	0	2
6698385	-16.7727	0.124773	17	1	2
6698385	-16.7727	0.124773	18	1	3
6698385	-16.7727	0.124773	19	1	2
6698385	-16.7727	0.124773	20	1	4
6698385	-16.7727	0.124773	21	1	4
6698385	-16.7727	0.124773	22	1	5
6698385	-16.7727	0.124773	23	1	4
6698385	-16.7727	0.124773	24	1	4
6698385	-16.7727	0.124773	25	1	4
6698385	-16.7727	0.124773	26	1	3
6698385	-16.7727	0.124773	27	1	5
6698385	-16.7727	0.124773	28	1	4
6698385	-16.7727	0.124773	29	1	5
6698385	-16.7727	0.124773	30	1	2
6698385	-16.7727	0.124773	31	1	2
6698385	-16.7727	0.124773	32	1	4
6698385	-16.7727	0.124773	33	1	4
6698385	-16.7727	0.124773	34	1	5
6698385	-16.7727	0.124773	35	1	5
6698385	-16.7727	0.124773	36	1	4
6698385	-16.7727	0.124773	37	1	4
6698385	-16.7727	0.124773	38	1	4
6698385	-16.7727	0.124773	39	1	5
6698385	-16.7727	0.124773	40	1	3
6698390	-21.7727	-0.0252273	1	0	5
6698390	-21.7727	-0.0252273	2	0	5
6698390	-21.7727	-0.0252273	3	1	3
6698390	-21.7727	-0.0252273	4	1	3
6698390	-21.7727	-0.0252273	5	1	1
6698390	-21.7727	-0.0252273	6	0	1
6698390	-21.7727	-0.0252273	7	0	1
6698390	-21.7727	-0.0252273	8	1	3
6698390	-21.7727	-0.0252273	9	0	4
6698390	-21.7727	-0.0252273	10	0	4
6698390	-21.7727	-0.0252273	11	0	3
6698390	-21.7727	-0.0252273	12	1	2
6698390	-21.7727	-0.0252273	13	0	5
6698390	-21.7727	-0.0252273	14	1	4
6698390	-21.7727	-0.0252273	15	1	3
6698390	-21.7727	-0.0252273	16	0	2
6698390	-21.7727	-0.0252273	17	0	3
6698390	-21.7727	-0.0252273	18	1	1
6698390	-21.7727	-0.0252273	19	1	4
6698390	-21.7727	-0.0252273	20	0	3
6698390	-21.7727	-0.0252273	21	1	4
6698390	-21.7727	-0.0252273	22	1	5
6698390	-21.7727	-0.0252273	23	1	3
6698390	-21.7727	-0.0252273	24	1	5
6698390	-21.7727	-0.0252273	25	1	5
6698390	-21.7727	-0.0252273	26	1	5
6698390	-21.7727	-0.0252273	27	1	5
6698390	-21.7727	-0.0252273	28	1	3
6698390	-21.7727	-0.0252273	29	1	5
6698390	-21.7727	-0.0252273	30	1	3
6698390	-21.7727	-0.0252273	31	1	4
6698390	-21.7727	-0.0252273	32	1	4
6698390	-21.7727	-0.0252273	33	1	3
6698390	-21.7727	-0.0252273	34	1	4
6698390	-21.7727	-0.0252273	35	1	4
6698390	-21.7727	-0.0252273	36	1	4
6698390	-21.7727	-0.0252273	37	1	5
6698390	-21.7727	-0.0252273	38	1	5
6698390	-21.7727	-0.0252273	39	1	4
6698390	-21.7727	-0.0252273	40	1	4
6698430	-25.7727	0.199773	1	1	4
6698430	-25.7727	0.199773	2	1	3
6698430	-25.7727	0.199773	3	0	2
6698430	-25.7727	0.199773	4	1	5
6698430	-25.7727	0.199773	5	1	4
6698430	-25.7727	0.199773	6	1	5
6698430	-25.7727	0.199773	7	1	0
6698430	-25.7727	0.199773	8	1	5
6698430	-25.7727	0.199773	9	1	4
6698430	-25.7727	0.199773	10	1	5
6698430	-25.7727	0.199773	11	1	4
6698430	-25.7727	0.199773	12	1	5
6698430	-25.7727	0.199773	13	1	5
6698430	-25.7727	0.199773	14	1	5
6698430	-25.7727	0.199773	15	1	5
6698430	-25.7727	0.199773	16	1	5
6698430	-25.7727	0.199773	17	1	5
6698430	-25.7727	0.199773	18	1	5
6698430	-25.7727	0.199773	19	0	1
6698430	-25.7727	0.199773	20	1	3
6698430	-25.7727	0.199773	21	1	5
6698430	-25.7727	0.199773	22	1	5
6698430	-25.7727	0.199773	23	1	5
6698430	-25.7727	0.199773	24	1	4
6698430	-25.7727	0.199773	25	1	5
6698430	-25.7727	0.199773	26	1	5
6698430	-25.7727	0.199773	27	1	4
6698430	-25.7727	0.199773	28	1	3
6698430	-25.7727	0.199773	29	1	5
6698430	-25.7727	0.199773	30	1	4
6698430	-25.7727	0.199773	31	1	5
6698430	-25.7727	0.199773	32	1	5
6698430	-25.7727	0.199773	33	1	4
6698430	-25.7727	0.199773	34	1	4
6698430	-25.7727	0.199773	35	1	4
6698430	-25.7727	0.199773	36	1	3
6698430	-25.7727	0.199773	37	1	5
6698430	-25.7727	0.199773	38	1	5
6698430	-25.7727	0.199773	39	1	4
6698430	-25.7727	0.199773	40	1	2
6698440	-30.7727	0.174773	1	0	4
6698440	-30.7727	0.174773	2	1	4
6698440	-30.7727	0.174773	3	1	4
6698440	-30.7727	0.174773	4	1	3
6698440	-30.7727	0.174773	5	1	3
6698440	-30.7727	0.174773	6	1	4
6698440	-30.7727	0.174773	7	1	4
6698440	-30.7727	0.174773	8	1	4
6698440	-30.7727	0.174773	9	1	4
6698440	-30.7727	0.174773	10	1	4
6698440	-30.7727	0.174773	11	1	3
6698440	-30.7727	0.174773	12	1	4
6698440	-30.7727	0.174773	13	1	3
6698440	-30.7727	0.174773	14	1	5
6698440	-30.7727	0.174773	15	1	4
6698440	-30.7727	0.174773	16	1	4
6698440	-30.7727	0.174773	17	1	3
6698440	-30.7727	0.174773	18	1	3
6698440	-30.7727	0.174773	19	1	4
6698440	-30.7727	0.174773	20	1	4
6698440	-30.7727	0.174773	21	1	5
6698440	-30.7727	0.174773	22	1	5
6698440	-30.7727	0.174773	23	1	5
6698440	-30.7727	0.174773	24	1	5
6698440	-30.7727	0.174773	25	1	3
6698440	-30.7727	0.174773	26	1	5
6698440	-30.7727	0.174773	27	1	4
6698440	-30.7727	0.174773	28	1	5
6698440	-30.7727	0.174773	29	1	5
6698440	-30.7727	0.174773	30	1	4
6698440	-30.7727	0.174773	31	1	4
6698440	-30.7727	0.174773	32	1	5
6698440	-30.7727	0.174773	33	1	4
6698440	-30.7727	0.174773	34	0	3
6698440	-30.7727	0.174773	35	1	5
6698440	-30.7727	0.174773	36	1	4
6698440	-30.7727	0.174773	37	1	5
6698440	-30.7727	0.174773	38	1	5
6698440	-30.7727	0.174773	39	1	5
6698440	-30.7727	0.174773	40	0	4
6698454	-33.7727	0.149773	1	1	5
6698454	-33.7727	0.149773	2	1	5
6698454	-33.7727	0.149773	3	1	5
6698454	-33.7727	0.149773	4	1	5
6698454	-33.7727	0.149773	5	1	5
6698454	-33.7727	0.149773	6	1	5
6698454	-33.7727	0.149773	7	1	5
6698454	-33.7727	0.149773	8	1	5
6698454	-33.7727	0.149773	9	1	5
6698454	-33.7727	0.149773	10	1	5
6698454	-33.7727	0.149773	11	1	5
6698454	-33.7727	0.149773	12	1	5
6698454	-33.7727	0.149773	13	1	5
6698454	-33.7727	0.149773	14	1	5
6698454	-33.7727	0.149773	15	1	5
6698454	-33.7727	0.149773	16	1	5
6698454	-33.7727	0.149773	17	1	5
6698454	-33.7727	0.149773	18	1	5
6698454	-33.7727	0.149773	19	1	5
6698454	-33.7727	0.149773	20	1	5
6698454	-33.7727	0.149773	21	1	5
6698454	-33.7727	0.149773	22	1	5
6698454	-33.7727	0.149773	23	1	3
6698454	-33.7727	0.149773	24	1	4
6698454	-33.7727	0.149773	25	1	5
6698454	-33.7727	0.149773	26	1	5
6698454	-33.7727	0.149773	27	1	5
6698454	-33.7727	0.149773	28	1	4
6698454	-33.7727	0.149773	29	1	3
6698454	-33.7727	0.149773	30	0	5
6698454	-33.7727	0.149773	31	0	5
6698454	-33.7727	0.149773	32	1	5
6698454	-33.7727	0.149773	33	1	5
6698454	-33.7727	0.149773	34	0	5
6698454	-33.7727	0.149773	35	0	1
6698454	-33.7727	0.149773	36	1	4
6698454	-33.7727	0.149773	37	1	5
6698454	-33.7727	0.149773	38	1	5
6698454	-33.7727	0.149773	39	1	3
6698454	-33.7727	0.149773	40	1	5
6698467	-20.7727	-0.0502273	1	0	4
6698467	-20.7727	-0.0502273	2	1	3
6698467	-20.7727	-0.0502273	3	0	4
6698467	-20.7727	-0.0502273	4	1	4
6698467	-20.7727	-0.0502273	5	0	5
6698467	-20.7727	-0.0502273	6	1	5
6698467	-20.7727	-0.0502273	7	0	5
6698467	-20.7727	-0.0502273	8	1	4
6698467	-20.7727	-0.0502273	9	0	4
6698467	-20.7727	-0.0502273	10	0	4
6698467	-20.7727	-0.0502273	11	1	4
6698467	-20.7727	-0.0502273	12	1	5
6698467	-20.7727	-0.0502273	13	1	4
6698467	-20.7727	-0.0502273	14	1	3
6698467	-20.7727	-0.0502273	15	0	2
6698467	-20.7727	-0.0502273	16	0	2
6698467	-20.7727	-0.0502273	17	1	5
6698467	-20.7727	-0.0502273	18	0	3
6698467	-20.7727	-0.0502273	19	0	3
6698467	-20.7727	-0.0502273	20	0	3
6698467	-20.7727	-0.0502273	21	1	5
6698467	-20.7727	-0.0502273	22	1	5
6698467	-20.7727	-0.0502273	23	1	5
6698467	-20.7727	-0.0502273	24	1	4
6698467	-20.7727	-0.0502273	25	1	4
6698467	-20.7727	-0.0502273	26	1	5
6698467	-20.7727	-0.0502273	27	1	4
6698467	-20.7727	-0.0502273	28	1	5
6698467	-20.7727	-0.0502273	29	1	5
6698467	-20.7727	-0.0502273	30	1	4
6698467	-20.7727	-0.0502273	31	1	5
6698467	-20.7727	-0.0502273	32	1	5
6698467	-20.7727	-0.0502273	33	1	4
6698467	-20.7727	-0.0502273	34	0	4
6698467	-20.7727	-0.0502273	35	1	5
6698467	-20.7727	-0.0502273	36	1	4
6698467	-20.7727	-0.0502273	37	1	5
6698467	-20.7727	-0.0502273	38	1	5
6698467	-20.7727	-0.0502273	39	1	4
6698467	-20.7727	-0.0502273	40	1	5
6698470	-24.7727	0.149773	1	1	5
6698470	-24.7727	0.149773	2	1	4
6698470	-24.7727	0.149773	3	1	5
6698470	-24.7727	0.149773	4	1	4
6698470	-24.7727	0.149773	5	0	4
6698470	-24.7727	0.149773	6	1	2
6698470	-24.7727	0.149773	7	1	5
6698470	-24.7727	0.149773	8	1	5
6698470	-24.7727	0.149773	9	1	5
6698470	-24.7727	0.149773	10	1	4
6698470	-24.7727	0.149773	11	1	4
6698470	-24.7727	0.149773	12	1	5
6698470	-24.7727	0.149773	13	1	3
6698470	-24.7727	0.149773	14	1	0
6698470	-24.7727	0.149773	15	0	4
6698470	-24.7727	0.149773	16	1	3
6698470	-24.7727	0.149773	17	1	5
6698470	-24.7727	0.149773	18	1	3
6698470	-24.7727	0.149773	19	1	3
6698470	-24.7727	0.149773	20	1	5
6698470	-24.7727	0.149773	21	1	5
6698470	-24.7727	0.149773	22	1	5
6698470	-24.7727	0.149773	23	1	2
6698470	-24.7727	0.149773	24	1	5
6698470	-24.7727	0.149773	25	1	4
6698470	-24.7727	0.149773	26	1	5
6698470	-24.7727	0.149773	27	1	5
6698470	-24.7727	0.149773	28	0	5
6698470	-24.7727	0.149773	29	1	5
6698470	-24.7727	0.149773	30	1	3
6698470	-24.7727	0.149773	31	1	5
6698470	-24.7727	0.149773	32	1	5
6698470	-24.7727	0.149773	33	0	5
6698470	-24.7727	0.149773	34	1	0
6698470	-24.7727	0.149773	35	1	4
6698470	-24.7727	0.149773	36	1	5
6698470	-24.7727	0.149773	37	1	4
6698470	-24.7727	0.149773	38	1	5
6698470	-24.7727	0.149773	39	1	3
6698470	-24.7727	0.149773	40	1	4
6698472	-3.77273	0.124773	1	1	3
6698472	-3.77273	0.124773	2	1	1
6698472	-3.77273	0.124773	3	1	1
6698472	-3.77273	0.124773	4	0	2
6698472	-3.77273	0.124773	5	1	2
6698472	-3.77273	0.124773	6	1	3
6698472	-3.77273	0.124773	7	1	4
6698472	-3.77273	0.124773	8	1	3
6698472	-3.77273	0.124773	9	1	3
6698472	-3.77273	0.124773	10	1	3
6698472	-3.77273	0.124773	11	1	3
6698472	-3.77273	0.124773	12	1	3
6698472	-3.77273	0.124773	13	1	4
6698472	-3.77273	0.124773	14	1	5
6698472	-3.77273	0.124773	15	1	5
6698472	-3.77273	0.124773	16	1	2
6698472	-3.77273	0.124773	17	1	3
6698472	-3.77273	0.124773	18	1	3
6698472	-3.77273	0.124773	19	1	2
6698472	-3.77273	0.124773	20	1	5
6698472	-3.77273	0.124773	21	1	2
6698472	-3.77273	0.124773	22	1	4
6698472	-3.77273	0.124773	23	1	4
6698472	-3.77273	0.124773	24	1	3
6698472	-3.77273	0.124773	25	0	2
6698472	-3.77273	0.124773	26	1	2
6698472	-3.77273	0.124773	27	1	3
6698472	-3.77273	0.124773	28	0	3
6698472	-3.77273	0.124773	29	1	3
6698472	-3.77273	0.124773	30	1	1
6698472	-3.77273	0.124773	31	0	4
6698472	-3.77273	0.124773	32	1	3
6698472	-3.77273	0.124773	33	0	4
6698472	-3.77273	0.124773	34	1	3
6698472	-3.77273	0.124773	35	1	4
6698472	-3.77273	0.124773	36	1	2
6698472	-3.77273	0.124773	37	1	4
6698472	-3.77273	0.124773	38	1	5
6698472	-3.77273	0.124773	39	1	2
6698472	-3.77273	0.124773	40	1	1
6698476	-16.7727	0.174773	1	0	2
6698476	-16.7727	0.174773	2	1	4
6698476	-16.7727	0.174773	3	1	3
6698476	-16.7727	0.174773	4	1	4
6698476	-16.7727	0.174773	5	1	3
6698476	-16.7727	0.174773	6	1	4
6698476	-16.7727	0.174773	7	0	3
6698476	-16.7727	0.174773	8	1	4
6698476	-16.7727	0.174773	9	1	2
6698476	-16.7727	0.174773	10	1	4
6698476	-16.7727	0.174773	11	1	3
6698476	-16.7727	0.174773	12	1	3
6698476	-16.7727	0.174773	13	1	2
6698476	-16.7727	0.174773	14	1	3
6698476	-16.7727	0.174773	15	1	4
6698476	-16.7727	0.174773	16	1	3
6698476	-16.7727	0.174773	17	1	4
6698476	-16.7727	0.174773	18	1	2
6698476	-16.7727	0.174773	19	1	3
6698476	-16.7727	0.174773	20	1	2
6698476	-16.7727	0.174773	21	1	4
6698476	-16.7727	0.174773	22	1	4
6698476	-16.7727	0.174773	23	1	3
6698476	-16.7727	0.174773	24	1	4
6698476	-16.7727	0.174773	25	1	4
6698476	-16.7727	0.174773	26	1	5
6698476	-16.7727	0.174773	27	1	4
6698476	-16.7727	0.174773	28	1	2
6698476	-16.7727	0.174773	29	1	5
6698476	-16.7727	0.174773	30	1	3
6698476	-16.7727	0.174773	31	1	3
6698476	-16.7727	0.174773	32	1	3
6698476	-16.7727	0.174773	33	1	3
6698476	-16.7727	0.174773	34	0	3
6698476	-16.7727	0.174773	35	1	3
6698476	-16.7727	0.174773	36	1	3
6698476	-16.7727	0.174773	37	1	3
6698476	-16.7727	0.174773	38	1	4
6698476	-16.7727	0.174773	39	1	2
6698476	-16.7727	0.174773	40	1	3
6698477	-10.7727	-0.0252273	1	0	1
6698477	-10.7727	-0.0252273	2	1	1
6698477	-10.7727	-0.0252273	3	1	2
6698477	-10.7727	-0.0252273	4	1	2
6698477	-10.7727	-0.0252273	5	1	3
6698477	-10.7727	-0.0252273	6	1	4
6698477	-10.7727	-0.0252273	7	1	4
6698477	-10.7727	-0.0252273	8	1	1
6698477	-10.7727	-0.0252273	9	1	1
6698477	-10.7727	-0.0252273	10	1	3
6698477	-10.7727	-0.0252273	11	1	1
6698477	-10.7727	-0.0252273	12	1	3
6698477	-10.7727	-0.0252273	13	1	5
6698477	-10.7727	-0.0252273	14	1	2
6698477	-10.7727	-0.0252273	15	1	3
6698477	-10.7727	-0.0252273	16	0	2
6698477	-10.7727	-0.0252273	17	1	4
6698477	-10.7727	-0.0252273	18	1	3
6698477	-10.7727	-0.0252273	19	1	3
6698477	-10.7727	-0.0252273	20	1	3
6698477	-10.7727	-0.0252273	21	0	1
6698477	-10.7727	-0.0252273	22	1	3
6698477	-10.7727	-0.0252273	23	0	1
6698477	-10.7727	-0.0252273	24	1	4
6698477	-10.7727	-0.0252273	25	1	1
6698477	-10.7727	-0.0252273	26	0	1
6698477	-10.7727	-0.0252273	27	0	1
6698477	-10.7727	-0.0252273	28	0	1
6698477	-10.7727	-0.0252273	29	1	3
6698477	-10.7727	-0.0252273	30	1	3
6698477	-10.7727	-0.0252273	31	0	1
6698477	-10.7727	-0.0252273	32	1	5
6698477	-10.7727	-0.0252273	33	0	4
6698477	-10.7727	-0.0252273	34	0	1
6698477	-10.7727	-0.0252273	35	1	3
6698477	-10.7727	-0.0252273	36	1	2
6698477	-10.7727	-0.0252273	37	1	3
6698477	-10.7727	-0.0252273	38	1	5
6698477	-10.7727	-0.0252273	39	0	1
6698477	-10.7727	-0.0252273	40	1	2
6698478	-11.7727	0.0747727	1	0	3
6698478	-11.7727	0.0747727	2	0	3
6698478	-11.7727	0.0747727	3	1	3
6698478	-11.7727	0.0747727	4	1	3
6698478	-11.7727	0.0747727	5	0	2
6698478	-11.7727	0.0747727	6	1	3
6698478	-11.7727	0.0747727	7	1	3
6698478	-11.7727	0.0747727	8	1	3
6698478	-11.7727	0.0747727	9	1	4
6698478	-11.7727	0.0747727	10	0	3
6698478	-11.7727	0.0747727	11	0	2
6698478	-11.7727	0.0747727	12	1	3
6698478	-11.7727	0.0747727	13	0	1
6698478	-11.7727	0.0747727	14	1	2
6698478	-11.7727	0.0747727	15	1	4
6698478	-11.7727	0.0747727	16	1	2
6698478	-11.7727	0.0747727	17	1	3
6698478	-11.7727	0.0747727	18	1	2
6698478	-11.7727	0.0747727	19	1	4
6698478	-11.7727	0.0747727	20	1	4
6698478	-11.7727	0.0747727	21	1	4
6698478	-11.7727	0.0747727	22	1	4
6698478	-11.7727	0.0747727	23	1	3
6698478	-11.7727	0.0747727	24	1	4
6698478	-11.7727	0.0747727	25	1	4
6698478	-11.7727	0.0747727	26	1	4
6698478	-11.7727	0.0747727	27	1	4
6698478	-11.7727	0.0747727	28	1	4
6698478	-11.7727	0.0747727	29	1	4
6698478	-11.7727	0.0747727	30	1	1
6698478	-11.7727	0.0747727	31	1	3
6698478	-11.7727	0.0747727	32	0	2
6698478	-11.7727	0.0747727	33	1	2
6698478	-11.7727	0.0747727	34	1	3
6698478	-11.7727	0.0747727	35	1	3
6698478	-11.7727	0.0747727	36	1	2
6698478	-11.7727	0.0747727	37	1	4
6698478	-11.7727	0.0747727	38	1	5
6698478	-11.7727	0.0747727	39	1	2
6698478	-11.7727	0.0747727	40	1	5
6698479	6.22727	0.0747727	1	0	2
6698479	6.22727	0.0747727	2	1	3
6698479	6.22727	0.0747727	3	1	1
6698479	6.22727	0.0747727	4	1	1
6698479	6.22727	0.0747727	5	0	1
6698479	6.22727	0.0747727	6	1	1
6698479	6.22727	0.0747727	7	0	1
6698479	6.22727	0.0747727	8	1	1
6698479	6.22727	0.0747727	9	0	1
6698479	6.22727	0.0747727	10	1	1
6698479	6.22727	0.0747727	11	1	1
6698479	6.22727	0.0747727	12	1	1
6698479	6.22727	0.0747727	13	1	1
6698479	6.22727	0.0747727	14	1	1
6698479	6.22727	0.0747727	15	1	2
6698479	6.22727	0.0747727	16	1	1
6698479	6.22727	0.0747727	17	0	2
6698479	6.22727	0.0747727	18	1	1
6698479	6.22727	0.0747727	19	1	1
6698479	6.22727	0.0747727	20	1	1
6698479	6.22727	0.0747727	21	1	2
6698479	6.22727	0.0747727	22	1	2
6698479	6.22727	0.0747727	23	1	2
6698479	6.22727	0.0747727	24	1	2
6698479	6.22727	0.0747727	25	1	1
6698479	6.22727	0.0747727	26	1	2
6698479	6.22727	0.0747727	27	1	1
6698479	6.22727	0.0747727	28	0	1
6698479	6.22727	0.0747727	29	1	1
6698479	6.22727	0.0747727	30	1	1
6698479	6.22727	0.0747727	31	1	2
6698479	6.22727	0.0747727	32	1	5
6698479	6.22727	0.0747727	33	1	2
6698479	6.22727	0.0747727	34	1	2
6698479	6.22727	0.0747727	35	1	2
6698479	6.22727	0.0747727	36	0	1
6698479	6.22727	0.0747727	37	1	1
6698479	6.22727	0.0747727	38	1	2
6698479	6.22727	0.0747727	39	1	2
6698479	6.22727	0.0747727	40	1	1
6698489	16.2273	-0.0252273	1	0	4
6698489	16.2273	-0.0252273	2	0	4
6698489	16.2273	-0.0252273	3	1	2
6698489	16.2273	-0.0252273	4	1	3
6698489	16.2273	-0.0252273	5	1	3
6698489	16.2273	-0.0252273	6	1	3
6698489	16.2273	-0.0252273	7	0	4
6698489	16.2273	-0.0252273	8	0	4
6698489	16.2273	-0.0252273	9	1	3
6698489	16.2273	-0.0252273	10	1	3
6698489	16.2273	-0.0252273	11	1	4
6698489	16.2273	-0.0252273	12	1	3
6698489	16.2273	-0.0252273	13	0	2
6698489	16.2273	-0.0252273	14	0	2
6698489	16.2273	-0.0252273	15	0	4
6698489	16.2273	-0.0252273	16	1	2
6698489	16.2273	-0.0252273	17	1	4
6698489	16.2273	-0.0252273	18	0	3
6698489	16.2273	-0.0252273	19	0	0
6698489	16.2273	-0.0252273	20	0	4
6698489	16.2273	-0.0252273	21	1	3
6698489	16.2273	-0.0252273	22	1	4
6698489	16.2273	-0.0252273	23	1	4
6698489	16.2273	-0.0252273	24	1	4
6698489	16.2273	-0.0252273	25	1	3
6698489	16.2273	-0.0252273	26	1	2
6698489	16.2273	-0.0252273	27	1	5
6698489	16.2273	-0.0252273	28	1	3
6698489	16.2273	-0.0252273	29	1	5
6698489	16.2273	-0.0252273	30	1	4
6698489	16.2273	-0.0252273	31	1	3
6698489	16.2273	-0.0252273	32	1	3
6698489	16.2273	-0.0252273	33	1	2
6698489	16.2273	-0.0252273	34	1	4
6698489	16.2273	-0.0252273	35	1	3
6698489	16.2273	-0.0252273	36	1	2
6698489	16.2273	-0.0252273	37	1	4
6698489	16.2273	-0.0252273	38	1	5
6698489	16.2273	-0.0252273	39	0	2
6698489	16.2273	-0.0252273	40	1	5
6698508	-2.77273	-0.0752273	1	0	4
6698508	-2.77273	-0.0752273	2	1	4
6698508	-2.77273	-0.0752273	3	0	3
6698508	-2.77273	-0.0752273	4	1	5
6698508	-2.77273	-0.0752273	5	1	4
6698508	-2.77273	-0.0752273	6	1	3
6698508	-2.77273	-0.0752273	7	0	4
6698508	-2.77273	-0.0752273	8	0	4
6698508	-2.77273	-0.0752273	9	0	4
6698508	-2.77273	-0.0752273	10	0	3
6698508	-2.77273	-0.0752273	11	1	3
6698508	-2.77273	-0.0752273	12	1	5
6698508	-2.77273	-0.0752273	13	1	3
6698508	-2.77273	-0.0752273	14	0	4
6698508	-2.77273	-0.0752273	15	1	3
6698508	-2.77273	-0.0752273	16	1	4
6698508	-2.77273	-0.0752273	17	1	4
6698508	-2.77273	-0.0752273	18	0	4
6698508	-2.77273	-0.0752273	19	1	3
6698508	-2.77273	-0.0752273	20	1	5
6698508	-2.77273	-0.0752273	21	1	3
6698508	-2.77273	-0.0752273	22	0	4
6698508	-2.77273	-0.0752273	23	1	4
6698508	-2.77273	-0.0752273	24	1	3
6698508	-2.77273	-0.0752273	25	1	3
6698508	-2.77273	-0.0752273	26	1	3
6698508	-2.77273	-0.0752273	27	1	4
6698508	-2.77273	-0.0752273	28	1	5
6698508	-2.77273	-0.0752273	29	1	3
6698508	-2.77273	-0.0752273	30	1	4
6698508	-2.77273	-0.0752273	31	1	4
6698508	-2.77273	-0.0752273	32	0	3
6698508	-2.77273	-0.0752273	33	0	3
6698508	-2.77273	-0.0752273	34	1	4
6698508	-2.77273	-0.0752273	35	1	4
6698508	-2.77273	-0.0752273	36	0	3
6698508	-2.77273	-0.0752273	37	0	3
6698508	-2.77273	-0.0752273	38	1	3
6698508	-2.77273	-0.0752273	39	1	3
6698508	-2.77273	-0.0752273	40	1	4
6698537	3.22727	0.0497727	1	1	1
6698537	3.22727	0.0497727	2	1	2
6698537	3.22727	0.0497727	3	1	3
6698537	3.22727	0.0497727	4	1	3
6698537	3.22727	0.0497727	5	0	4
6698537	3.22727	0.0497727	6	1	3
6698537	3.22727	0.0497727	7	0	3
6698537	3.22727	0.0497727	8	0	4
6698537	3.22727	0.0497727	9	0	1
6698537	3.22727	0.0497727	10	0	2
6698537	3.22727	0.0497727	11	1	3
6698537	3.22727	0.0497727	12	1	2
6698537	3.22727	0.0497727	13	1	4
6698537	3.22727	0.0497727	14	1	2
6698537	3.22727	0.0497727	15	1	4
6698537	3.22727	0.0497727	16	0	3
6698537	3.22727	0.0497727	17	1	3
6698537	3.22727	0.0497727	18	0	2
6698537	3.22727	0.0497727	19	0	2
6698537	3.22727	0.0497727	20	1	3
6698537	3.22727	0.0497727	21	1	4
6698537	3.22727	0.0497727	22	1	5
6698537	3.22727	0.0497727	23	1	4
6698537	3.22727	0.0497727	24	1	4
6698537	3.22727	0.0497727	25	1	4
6698537	3.22727	0.0497727	26	1	4
6698537	3.22727	0.0497727	27	1	4
6698537	3.22727	0.0497727	28	1	3
6698537	3.22727	0.0497727	29	1	4
6698537	3.22727	0.0497727	30	1	1
6698537	3.22727	0.0497727	31	1	3
6698537	3.22727	0.0497727	32	1	4
6698537	3.22727	0.0497727	33	1	4
6698537	3.22727	0.0497727	34	1	4
6698537	3.22727	0.0497727	35	1	4
6698537	3.22727	0.0497727	36	1	2
6698537	3.22727	0.0497727	37	1	4
6698537	3.22727	0.0497727	38	1	3
6698537	3.22727	0.0497727	39	1	4
6698537	3.22727	0.0497727	40	1	3
6698550	-12.7727	-0.125227	1	0	4
6698550	-12.7727	-0.125227	2	0	4
6698550	-12.7727	-0.125227	3	0	4
6698550	-12.7727	-0.125227	4	0	4
6698550	-12.7727	-0.125227	5	1	4
6698550	-12.7727	-0.125227	6	0	4
6698550	-12.7727	-0.125227	7	0	4
6698550	-12.7727	-0.125227	8	0	4
6698550	-12.7727	-0.125227	9	1	4
6698550	-12.7727	-0.125227	10	0	4
6698550	-12.7727	-0.125227	11	0	4
6698550	-12.7727	-0.125227	12	1	3
6698550	-12.7727	-0.125227	13	1	4
6698550	-12.7727	-0.125227	14	0	4
6698550	-12.7727	-0.125227	15	0	4
6698550	-12.7727	-0.125227	16	0	4
6698550	-12.7727	-0.125227	17	0	4
6698550	-12.7727	-0.125227	18	0	4
6698550	-12.7727	-0.125227	19	0	4
6698550	-12.7727	-0.125227	20	1	4
6698550	-12.7727	-0.125227	21	1	4
6698550	-12.7727	-0.125227	22	1	4
6698550	-12.7727	-0.125227	23	1	4
6698550	-12.7727	-0.125227	24	1	4
6698550	-12.7727	-0.125227	25	1	4
6698550	-12.7727	-0.125227	26	1	4
6698550	-12.7727	-0.125227	27	1	4
6698550	-12.7727	-0.125227	28	1	4
6698550	-12.7727	-0.125227	29	1	4
6698550	-12.7727	-0.125227	30	1	4
6698550	-12.7727	-0.125227	31	1	4
6698550	-12.7727	-0.125227	32	1	5
6698550	-12.7727	-0.125227	33	1	4
6698550	-12.7727	-0.125227	34	1	4
6698550	-12.7727	-0.125227	35	1	4
6698550	-12.7727	-0.125227	36	1	4
6698550	-12.7727	-0.125227	37	1	4
6698550	-12.7727	-0.125227	38	1	4
6698550	-12.7727	-0.125227	39	1	4
6698550	-12.7727	-0.125227	40	1	4
6698554	18.2273	0.149773	1	1	2
6698554	18.2273	0.149773	2	1	3
6698554	18.2273	0.149773	3	1	5
6698554	18.2273	0.149773	4	1	5
6698554	18.2273	0.149773	5	1	5
6698554	18.2273	0.149773	6	1	5
6698554	18.2273	0.149773	7	0	5
6698554	18.2273	0.149773	8	1	5
6698554	18.2273	0.149773	9	1	5
6698554	18.2273	0.149773	10	1	5
6698554	18.2273	0.149773	11	1	5
6698554	18.2273	0.149773	12	1	5
6698554	18.2273	0.149773	13	1	5
6698554	18.2273	0.149773	14	1	4
6698554	18.2273	0.149773	15	1	5
6698554	18.2273	0.149773	16	0	4
6698554	18.2273	0.149773	17	1	5
6698554	18.2273	0.149773	18	1	5
6698554	18.2273	0.149773	19	1	4
6698554	18.2273	0.149773	20	0	4
6698554	18.2273	0.149773	21	1	4
6698554	18.2273	0.149773	22	1	5
6698554	18.2273	0.149773	23	1	4
6698554	18.2273	0.149773	24	1	4
6698554	18.2273	0.149773	25	1	5
6698554	18.2273	0.149773	26	1	4
6698554	18.2273	0.149773	27	1	3
6698554	18.2273	0.149773	28	1	5
6698554	18.2273	0.149773	29	1	4
6698554	18.2273	0.149773	30	1	4
6698554	18.2273	0.149773	31	1	5
6698554	18.2273	0.149773	32	1	4
6698554	18.2273	0.149773	33	1	4
6698554	18.2273	0.149773	34	1	4
6698554	18.2273	0.149773	35	1	5
6698554	18.2273	0.149773	36	0	5
6698554	18.2273	0.149773	37	1	5
6698554	18.2273	0.149773	38	1	5
6698554	18.2273	0.149773	39	1	3
6698554	18.2273	0.149773	40	1	5
6698559	6.22727	-0.0502273	1	1	4
6698559	6.22727	-0.0502273	2	1	4
6698559	6.22727	-0.0502273	3	1	4
6698559	6.22727	-0.0502273	4	1	3
6698559	6.22727	-0.0502273	5	1	4
6698559	6.22727	-0.0502273	6	1	4
6698559	6.22727	-0.0502273	7	0	4
6698559	6.22727	-0.0502273	8	1	3
6698559	6.22727	-0.0502273	9	1	4
6698559	6.22727	-0.0502273	10	1	4
6698559	6.22727	-0.0502273	11	1	4
6698559	6.22727	-0.0502273	12	1	5
6698559	6.22727	-0.0502273	13	0	4
6698559	6.22727	-0.0502273	14	1	5
6698559	6.22727	-0.0502273	15	1	4
6698559	6.22727	-0.0502273	16	1	3
6698559	6.22727	-0.0502273	17	1	4
6698559	6.22727	-0.0502273	18	1	4
6698559	6.22727	-0.0502273	19	1	4
6698559	6.22727	-0.0502273	20	1	5
6698559	6.22727	-0.0502273	21	0	4
6698559	6.22727	-0.0502273	22	1	4
6698559	6.22727	-0.0502273	23	0	4
6698559	6.22727	-0.0502273	24	1	4
6698559	6.22727	-0.0502273	25	1	4
6698559	6.22727	-0.0502273	26	1	4
6698559	6.22727	-0.0502273	27	1	4
6698559	6.22727	-0.0502273	28	1	4
6698559	6.22727	-0.0502273	29	1	5
6698559	6.22727	-0.0502273	30	0	3
6698559	6.22727	-0.0502273	31	0	4
6698559	6.22727	-0.0502273	32	0	2
6698559	6.22727	-0.0502273	33	0	4
6698559	6.22727	-0.0502273	34	1	4
6698559	6.22727	-0.0502273	35	0	4
6698559	6.22727	-0.0502273	36	0	5
6698559	6.22727	-0.0502273	37	1	5
6698559	6.22727	-0.0502273	38	0	4
6698559	6.22727	-0.0502273	39	1	4
6698559	6.22727	-0.0502273	40	0	3
6698560	7.22727	-0.150227	1	0	3
6698560	7.22727	-0.150227	2	0	4
6698560	7.22727	-0.150227	3	0	3
6698560	7.22727	-0.150227	4	0	4
6698560	7.22727	-0.150227	5	1	3
6698560	7.22727	-0.150227	6	0	4
6698560	7.22727	-0.150227	7	0	5
6698560	7.22727	-0.150227	8	0	2
6698560	7.22727	-0.150227	9	0	2
6698560	7.22727	-0.150227	10	0	3
6698560	7.22727	-0.150227	11	0	3
6698560	7.22727	-0.150227	12	0	4
6698560	7.22727	-0.150227	13	0	3
6698560	7.22727	-0.150227	14	0	4
6698560	7.22727	-0.150227	15	1	2
6698560	7.22727	-0.150227	16	0	3
6698560	7.22727	-0.150227	17	1	3
6698560	7.22727	-0.150227	18	1	2
6698560	7.22727	-0.150227	19	0	5
6698560	7.22727	-0.150227	20	0	4
6698560	7.22727	-0.150227	21	1	3
6698560	7.22727	-0.150227	22	1	5
6698560	7.22727	-0.150227	23	1	3
6698560	7.22727	-0.150227	24	1	4
6698560	7.22727	-0.150227	25	1	2
6698560	7.22727	-0.150227	26	1	4
6698560	7.22727	-0.150227	27	1	5
6698560	7.22727	-0.150227	28	1	3
6698560	7.22727	-0.150227	29	1	3
6698560	7.22727	-0.150227	30	1	4
6698560	7.22727	-0.150227	31	1	3
6698560	7.22727	-0.150227	32	1	4
6698560	7.22727	-0.150227	33	1	3
6698560	7.22727	-0.150227	34	1	3
6698560	7.22727	-0.150227	35	1	3
6698560	7.22727	-0.150227	36	1	2
6698560	7.22727	-0.150227	37	1	4
6698560	7.22727	-0.150227	38	1	2
6698560	7.22727	-0.150227	39	1	5
6698560	7.22727	-0.150227	40	1	4
6698561	18.2273	-0.0752273	1	1	5
6698561	18.2273	-0.0752273	2	1	5
6698561	18.2273	-0.0752273	3	0	5
6698561	18.2273	-0.0752273	4	0	5
6698561	18.2273	-0.0752273	5	1	5
6698561	18.2273	-0.0752273	6	0	5
6698561	18.2273	-0.0752273	7	0	5
6698561	18.2273	-0.0752273	8	0	5
6698561	18.2273	-0.0752273	9	1	5
6698561	18.2273	-0.0752273	10	0	5
6698561	18.2273	-0.0752273	11	0	5
6698561	18.2273	-0.0752273	12	0	5
6698561	18.2273	-0.0752273	13	1	5
6698561	18.2273	-0.0752273	14	1	5
6698561	18.2273	-0.0752273	15	0	5
6698561	18.2273	-0.0752273	16	1	5
6698561	18.2273	-0.0752273	17	1	5
6698561	18.2273	-0.0752273	18	0	5
6698561	18.2273	-0.0752273	19	0	5
6698561	18.2273	-0.0752273	20	0	5
6698561	18.2273	-0.0752273	21	1	5
6698561	18.2273	-0.0752273	22	1	5
6698561	18.2273	-0.0752273	23	1	5
6698561	18.2273	-0.0752273	24	1	5
6698561	18.2273	-0.0752273	25	1	4
6698561	18.2273	-0.0752273	26	1	5
6698561	18.2273	-0.0752273	27	1	5
6698561	18.2273	-0.0752273	28	1	5
6698561	18.2273	-0.0752273	29	1	5
6698561	18.2273	-0.0752273	30	1	4
6698561	18.2273	-0.0752273	31	1	5
6698561	18.2273	-0.0752273	32	1	5
6698561	18.2273	-0.0752273	33	1	5
6698561	18.2273	-0.0752273	34	0	5
6698561	18.2273	-0.0752273	35	1	5
6698561	18.2273	-0.0752273	36	1	5
6698561	18.2273	-0.0752273	37	1	5
6698561	18.2273	-0.0752273	38	1	5
6698561	18.2273	-0.0752273	39	1	5
6698561	18.2273	-0.0752273	40	1	5
6698570	-10.7727	0.174773	1	0	4
6698570	-10.7727	0.174773	2	1	4
6698570	-10.7727	0.174773	3	1	4
6698570	-10.7727	0.174773	4	1	4
6698570	-10.7727	0.174773	5	1	4
6698570	-10.7727	0.174773	6	1	4
6698570	-10.7727	0.174773	7	1	4
6698570	-10.7727	0.174773	8	1	4
6698570	-10.7727	0.174773	9	0	3
6698570	-10.7727	0.174773	10	1	4
6698570	-10.7727	0.174773	11	1	4
6698570	-10.7727	0.174773	12	1	5
6698570	-10.7727	0.174773	13	1	2
6698570	-10.7727	0.174773	14	1	4
6698570	-10.7727	0.174773	15	1	4
6698570	-10.7727	0.174773	16	1	3
6698570	-10.7727	0.174773	17	1	3
6698570	-10.7727	0.174773	18	1	4
6698570	-10.7727	0.174773	19	0	2
6698570	-10.7727	0.174773	20	1	4
6698570	-10.7727	0.174773	21	1	3
6698570	-10.7727	0.174773	22	1	5
6698570	-10.7727	0.174773	23	1	4
6698570	-10.7727	0.174773	24	1	4
6698570	-10.7727	0.174773	25	1	5
6698570	-10.7727	0.174773	26	1	5
6698570	-10.7727	0.174773	27	1	5
6698570	-10.7727	0.174773	28	1	4
6698570	-10.7727	0.174773	29	1	5
6698570	-10.7727	0.174773	30	1	3
6698570	-10.7727	0.174773	31	1	4
6698570	-10.7727	0.174773	32	1	3
6698570	-10.7727	0.174773	33	1	4
6698570	-10.7727	0.174773	34	1	4
6698570	-10.7727	0.174773	35	1	3
6698570	-10.7727	0.174773	36	1	4
6698570	-10.7727	0.174773	37	1	5
6698570	-10.7727	0.174773	38	1	5
6698570	-10.7727	0.174773	39	1	5
6698570	-10.7727	0.174773	40	1	4
6698582	10.2273	-0.100227	1	1	1
6698582	10.2273	-0.100227	2	1	5
6698582	10.2273	-0.100227	3	1	3
6698582	10.2273	-0.100227	4	1	5
6698582	10.2273	-0.100227	5	1	4
6698582	10.2273	-0.100227	6	0	4
6698582	10.2273	-0.100227	7	1	4
6698582	10.2273	-0.100227	8	1	3
6698582	10.2273	-0.100227	9	1	4
6698582	10.2273	-0.100227	10	0	4
6698582	10.2273	-0.100227	11	1	4
6698582	10.2273	-0.100227	12	1	4
6698582	10.2273	-0.100227	13	1	4
6698582	10.2273	-0.100227	14	0	4
6698582	10.2273	-0.100227	15	1	4
6698582	10.2273	-0.100227	16	0	3
6698582	10.2273	-0.100227	17	0	3
6698582	10.2273	-0.100227	18	0	3
6698582	10.2273	-0.100227	19	1	1
6698582	10.2273	-0.100227	20	1	3
6698582	10.2273	-0.100227	21	0	5
6698582	10.2273	-0.100227	22	1	2
6698582	10.2273	-0.100227	23	0	4
6698582	10.2273	-0.100227	24	1	5
6698582	10.2273	-0.100227	25	1	4
6698582	10.2273	-0.100227	26	1	4
6698582	10.2273	-0.100227	27	0	3
6698582	10.2273	-0.100227	28	1	4
6698582	10.2273	-0.100227	29	1	3
6698582	10.2273	-0.100227	30	0	3
6698582	10.2273	-0.100227	31	1	4
6698582	10.2273	-0.100227	32	0	3
6698582	10.2273	-0.100227	33	0	4
6698582	10.2273	-0.100227	34	1	3
6698582	10.2273	-0.100227	35	1	4
6698582	10.2273	-0.100227	36	0	3
6698582	10.2273	-0.100227	37	0	2
6698582	10.2273	-0.100227	38	1	4
6698582	10.2273	-0.100227	39	1	4
6698582	10.2273	-0.100227	40	1	3
6698584	1.22727	-0.0502273	1	0	1
6698584	1.22727	-0.0502273	2	1	2
6698584	1.22727	-0.0502273	3	1	2
6698584	1.22727	-0.0502273	4	0	2
6698584	1.22727	-0.0502273	5	0	5
6698584	1.22727	-0.0502273	6	1	2
6698584	1.22727	-0.0502273	7	1	4
6698584	1.22727	-0.0502273	8	0	1
6698584	1.22727	-0.0502273	9	1	1
6698584	1.22727	-0.0502273	10	0	0
6698584	1.22727	-0.0502273	11	1	2
6698584	1.22727	-0.0502273	12	1	5
6698584	1.22727	-0.0502273	13	0	2
6698584	1.22727	-0.0502273	14	0	3
6698584	1.22727	-0.0502273	15	1	5
6698584	1.22727	-0.0502273	16	1	4
6698584	1.22727	-0.0502273	17	1	5
6698584	1.22727	-0.0502273	18	0	0
6698584	1.22727	-0.0502273	19	0	2
6698584	1.22727	-0.0502273	20	1	4
6698584	1.22727	-0.0502273	21	1	1
6698584	1.22727	-0.0502273	22	1	4
6698584	1.22727	-0.0502273	23	0	2
6698584	1.22727	-0.0502273	24	1	4
6698584	1.22727	-0.0502273	25	1	5
6698584	1.22727	-0.0502273	26	1	5
6698584	1.22727	-0.0502273	27	1	4
6698584	1.22727	-0.0502273	28	1	4
6698584	1.22727	-0.0502273	29	1	4
6698584	1.22727	-0.0502273	30	0	4
6698584	1.22727	-0.0502273	31	1	1
6698584	1.22727	-0.0502273	32	1	1
6698584	1.22727	-0.0502273	33	1	2
6698584	1.22727	-0.0502273	34	1	2
6698584	1.22727	-0.0502273	35	1	2
6698584	1.22727	-0.0502273	36	1	2
6698584	1.22727	-0.0502273	37	1	3
6698584	1.22727	-0.0502273	38	1	4
6698584	1.22727	-0.0502273	39	1	5
6698584	1.22727	-0.0502273	40	0	1
6698585	19.2273	-0.0752273	1	1	2
6698585	19.2273	-0.0752273	2	0	4
6698585	19.2273	-0.0752273	3	0	4
6698585	19.2273	-0.0752273	4	0	3
6698585	19.2273	-0.0752273	5	1	2
6698585	19.2273	-0.0752273	6	1	3
6698585	19.2273	-0.0752273	7	0	3
6698585	19.2273	-0.0752273	8	0	4
6698585	19.2273	-0.0752273	9	1	3
6698585	19.2273	-0.0752273	10	1	2
6698585	19.2273	-0.0752273	11	0	4
6698585	19.2273	-0.0752273	12	1	3
6698585	19.2273	-0.0752273	13	1	2
6698585	19.2273	-0.0752273	14	0	4
6698585	19.2273	-0.0752273	15	1	2
6698585	19.2273	-0.0752273	16	1	2
6698585	19.2273	-0.0752273	17	1	2
6698585	19.2273	-0.0752273	18	1	1
6698585	19.2273	-0.0752273	19	0	3
6698585	19.2273	-0.0752273	20	0	4
6698585	19.2273	-0.0752273	21	1	4
6698585	19.2273	-0.0752273	22	1	3
6698585	19.2273	-0.0752273	23	1	2
6698585	19.2273	-0.0752273	24	1	4
6698585	19.2273	-0.0752273	25	1	4
6698585	19.2273	-0.0752273	26	1	4
6698585	19.2273	-0.0752273	27	1	2
6698585	19.2273	-0.0752273	28	0	2
6698585	19.2273	-0.0752273	29	1	3
6698585	19.2273	-0.0752273	30	1	3
6698585	19.2273	-0.0752273	31	1	3
6698585	19.2273	-0.0752273	32	1	3
6698585	19.2273	-0.0752273	33	0	1
6698585	19.2273	-0.0752273	34	1	3
6698585	19.2273	-0.0752273	35	1	3
6698585	19.2273	-0.0752273	36	0	1
6698585	19.2273	-0.0752273	37	1	3
6698585	19.2273	-0.0752273	38	1	4
6698585	19.2273	-0.0752273	39	1	3
6698585	19.2273	-0.0752273	40	0	4
6698588	8.22727	0.124773	1	0	3
6698588	8.22727	0.124773	2	1	2
6698588	8.22727	0.124773	3	0	2
6698588	8.22727	0.124773	4	1	4
6698588	8.22727	0.124773	5	1	3
6698588	8.22727	0.124773	6	1	4
6698588	8.22727	0.124773	7	1	0
6698588	8.22727	0.124773	8	0	2
6698588	8.22727	0.124773	9	1	3
6698588	8.22727	0.124773	10	1	3
6698588	8.22727	0.124773	11	1	3
6698588	8.22727	0.124773	12	1	2
6698588	8.22727	0.124773	13	1	4
6698588	8.22727	0.124773	14	1	3
6698588	8.22727	0.124773	15	1	4
6698588	8.22727	0.124773	16	1	3
6698588	8.22727	0.124773	17	1	2
6698588	8.22727	0.124773	18	1	4
6698588	8.22727	0.124773	19	0	3
6698588	8.22727	0.124773	20	1	5
6698588	8.22727	0.124773	21	1	2
6698588	8.22727	0.124773	22	1	3
6698588	8.22727	0.124773	23	1	3
6698588	8.22727	0.124773	24	1	3
6698588	8.22727	0.124773	25	1	4
6698588	8.22727	0.124773	26	1	4
6698588	8.22727	0.124773	27	1	2
6698588	8.22727	0.124773	28	1	3
6698588	8.22727	0.124773	29	1	5
6698588	8.22727	0.124773	30	1	3
6698588	8.22727	0.124773	31	1	3
6698588	8.22727	0.124773	32	1	3
6698588	8.22727	0.124773	33	1	4
6698588	8.22727	0.124773	34	1	4
6698588	8.22727	0.124773	35	1	4
6698588	8.22727	0.124773	36	1	3
6698588	8.22727	0.124773	37	1	3
6698588	8.22727	0.124773	38	1	4
6698588	8.22727	0.124773	39	1	4
6698588	8.22727	0.124773	40	0	3
6698589	-13.7727	-0.0252273	1	1	2
6698589	-13.7727	-0.0252273	2	0	3
6698589	-13.7727	-0.0252273	3	1	5
6698589	-13.7727	-0.0252273	4	0	5
6698589	-13.7727	-0.0252273	5	0	3
6698589	-13.7727	-0.0252273	6	1	4
6698589	-13.7727	-0.0252273	7	0	3
6698589	-13.7727	-0.0252273	8	0	3
6698589	-13.7727	-0.0252273	9	1	4
6698589	-13.7727	-0.0252273	10	0	2
6698589	-13.7727	-0.0252273	11	0	4
6698589	-13.7727	-0.0252273	12	1	2
6698589	-13.7727	-0.0252273	13	0	4
6698589	-13.7727	-0.0252273	14	1	5
6698589	-13.7727	-0.0252273	15	1	5
6698589	-13.7727	-0.0252273	16	1	4
6698589	-13.7727	-0.0252273	17	1	5
6698589	-13.7727	-0.0252273	18	1	3
6698589	-13.7727	-0.0252273	19	1	1
6698589	-13.7727	-0.0252273	20	1	4
6698589	-13.7727	-0.0252273	21	1	3
6698589	-13.7727	-0.0252273	22	1	5
6698589	-13.7727	-0.0252273	23	1	2
6698589	-13.7727	-0.0252273	24	1	5
6698589	-13.7727	-0.0252273	25	1	5
6698589	-13.7727	-0.0252273	26	1	4
6698589	-13.7727	-0.0252273	27	1	5
6698589	-13.7727	-0.0252273	28	0	2
6698589	-13.7727	-0.0252273	29	1	5
6698589	-13.7727	-0.0252273	30	1	4
6698589	-13.7727	-0.0252273	31	0	3
6698589	-13.7727	-0.0252273	32	1	4
6698589	-13.7727	-0.0252273	33	1	3
6698589	-13.7727	-0.0252273	34	1	4
6698589	-13.7727	-0.0252273	35	1	5
6698589	-13.7727	-0.0252273	36	0	3
6698589	-13.7727	-0.0252273	37	1	5
6698589	-13.7727	-0.0252273	38	1	5
6698589	-13.7727	-0.0252273	39	1	5
[truncated: 6,801 more rows]

## Sheet: Predicting EFCT responses
PID	Self-assessed ability (PI20)	Objective ability (GFMT2-SA)	Trial number	Trial accuracy	Trial confidence
6694929	-8.77273	0.0247727	1	1	5
6694929	-8.77273	0.0247727	2	0	4
6694929	-8.77273	0.0247727	3	1	4
6694929	-8.77273	0.0247727	4	0	5
6694929	-8.77273	0.0247727	5	0	2
6694929	-8.77273	0.0247727	6	1	0
6694929	-8.77273	0.0247727	7	1	1
6694929	-8.77273	0.0247727	8	1	3
6694929	-8.77273	0.0247727	9	0	1
6694929	-8.77273	0.0247727	10	1	4
6694929	-8.77273	0.0247727	11	0	4
6694929	-8.77273	0.0247727	12	1	4
6694929	-8.77273	0.0247727	13	1	3
6694929	-8.77273	0.0247727	14	0	4
6694929	-8.77273	0.0247727	15	0	4
6694929	-8.77273	0.0247727	16	1	4
6694929	-8.77273	0.0247727	17	1	4
6694929	-8.77273	0.0247727	18	0	4
6694929	-8.77273	0.0247727	19	1	4
6694929	-8.77273	0.0247727	20	1	4
6694929	-8.77273	0.0247727	21	0	3
6694929	-8.77273	0.0247727	22	0	4
6694929	-8.77273	0.0247727	23	0	4
6694929	-8.77273	0.0247727	24	1	3
6694929	-8.77273	0.0247727	25	0	4
6694929	-8.77273	0.0247727	26	1	2
6694929	-8.77273	0.0247727	27	0	1
6694929	-8.77273	0.0247727	28	0	5
6694929	-8.77273	0.0247727	29	0	2
6694929	-8.77273	0.0247727	30	1	4
6694929	-8.77273	0.0247727	31	0	3
6694929	-8.77273	0.0247727	32	1	4
6694929	-8.77273	0.0247727	33	1	1
6694929	-8.77273	0.0247727	34	0	4
6694929	-8.77273	0.0247727	35	1	2
6694929	-8.77273	0.0247727	36	1	4
6694929	-8.77273	0.0247727	37	1	4
6694929	-8.77273	0.0247727	38	1	4
6694929	-8.77273	0.0247727	39	1	3
6694929	-8.77273	0.0247727	40	1	4
6694929	-8.77273	0.0247727	41	1	4
6694929	-8.77273	0.0247727	42	0	2
6694929	-8.77273	0.0247727	43	1	3
6694929	-8.77273	0.0247727	44	1	3
6694929	-8.77273	0.0247727	45	1	4
6694929	-8.77273	0.0247727	46	0	3
6694929	-8.77273	0.0247727	47	1	2
6694929	-8.77273	0.0247727	48	1	4
6694929	-8.77273	0.0247727	49	1	3
6694929	-8.77273	0.0247727	50	1	5
6694929	-8.77273	0.0247727	51	1	0
6694929	-8.77273	0.0247727	52	1	4
6694929	-8.77273	0.0247727	53	1	3
6694929	-8.77273	0.0247727	54	1	3
6694929	-8.77273	0.0247727	55	1	1
6694929	-8.77273	0.0247727	56	1	5
6694929	-8.77273	0.0247727	57	0	3
6694929	-8.77273	0.0247727	58	1	1
6694929	-8.77273	0.0247727	59	1	4
6694929	-8.77273	0.0247727	60	1	4
6694929	-8.77273	0.0247727	61	1	1
6694929	-8.77273	0.0247727	62	1	4
6694929	-8.77273	0.0247727	63	0	1
6694929	-8.77273	0.0247727	64	1	5
6694929	-8.77273	0.0247727	65	1	4
6694929	-8.77273	0.0247727	66	0	3
6694929	-8.77273	0.0247727	67	1	4
6694929	-8.77273	0.0247727	68	1	1
6694929	-8.77273	0.0247727	69	1	4
6694929	-8.77273	0.0247727	70	1	1
6694929	-8.77273	0.0247727	71	1	3
6694929	-8.77273	0.0247727	72	1	5
6694929	-8.77273	0.0247727	73	1	4
6694929	-8.77273	0.0247727	74	1	4
6694929	-8.77273	0.0247727	75	1	5
6694929	-8.77273	0.0247727	76	1	4
6694929	-8.77273	0.0247727	77	1	5
6694929	-8.77273	0.0247727	78	1	5
6694929	-8.77273	0.0247727	79	1	4
6694929	-8.77273	0.0247727	80	1	4
6694929	-8.77273	0.0247727	81	1	4
6694929	-8.77273	0.0247727	82	1	5
6694929	-8.77273	0.0247727	83	1	4
6694929	-8.77273	0.0247727	84	1	5
6698317	-11.7727	0.124773	1	1	5
6698317	-11.7727	0.124773	2	0	5
6698317	-11.7727	0.124773	3	0	3
6698317	-11.7727	0.124773	4	0	4
6698317	-11.7727	0.124773	5	1	3
6698317	-11.7727	0.124773	6	0	3
6698317	-11.7727	0.124773	7	0	4
6698317	-11.7727	0.124773	8	1	3
6698317	-11.7727	0.124773	9	1	5
6698317	-11.7727	0.124773	10	0	2
6698317	-11.7727	0.124773	11	1	3
6698317	-11.7727	0.124773	12	0	5
6698317	-11.7727	0.124773	13	0	4
6698317	-11.7727	0.124773	14	1	2
6698317	-11.7727	0.124773	15	0	3
6698317	-11.7727	0.124773	16	0	5
6698317	-11.7727	0.124773	17	1	4
6698317	-11.7727	0.124773	18	0	4
6698317	-11.7727	0.124773	19	1	5
6698317	-11.7727	0.124773	20	1	3
6698317	-11.7727	0.124773	21	0	4
6698317	-11.7727	0.124773	22	1	3
6698317	-11.7727	0.124773	23	1	3
6698317	-11.7727	0.124773	24	0	4
6698317	-11.7727	0.124773	25	0	4
6698317	-11.7727	0.124773	26	1	4
6698317	-11.7727	0.124773	27	0	5
6698317	-11.7727	0.124773	28	0	5
6698317	-11.7727	0.124773	29	0	5
6698317	-11.7727	0.124773	30	0	3
6698317	-11.7727	0.124773	31	0	4
6698317	-11.7727	0.124773	32	1	4
6698317	-11.7727	0.124773	33	1	4
6698317	-11.7727	0.124773	34	0	4
6698317	-11.7727	0.124773	35	1	3
6698317	-11.7727	0.124773	36	1	3
6698317	-11.7727	0.124773	37	0	5
6698317	-11.7727	0.124773	38	1	4
6698317	-11.7727	0.124773	39	1	2
6698317	-11.7727	0.124773	40	0	4
6698317	-11.7727	0.124773	41	1	2
6698317	-11.7727	0.124773	42	0	3
6698317	-11.7727	0.124773	43	1	4
6698317	-11.7727	0.124773	44	1	4
6698317	-11.7727	0.124773	45	1	5
6698317	-11.7727	0.124773	46	1	4
6698317	-11.7727	0.124773	47	1	4
6698317	-11.7727	0.124773	48	1	5
6698317	-11.7727	0.124773	49	1	5
6698317	-11.7727	0.124773	50	1	5
6698317	-11.7727	0.124773	51	1	4
6698317	-11.7727	0.124773	52	1	4
6698317	-11.7727	0.124773	53	1	4
6698317	-11.7727	0.124773	54	1	5
6698317	-11.7727	0.124773	55	1	4
6698317	-11.7727	0.124773	56	1	4
6698317	-11.7727	0.124773	57	1	4
6698317	-11.7727	0.124773	58	1	4
6698317	-11.7727	0.124773	59	1	4
6698317	-11.7727	0.124773	60	1	4
6698317	-11.7727	0.124773	61	0	1
6698317	-11.7727	0.124773	62	1	5
6698317	-11.7727	0.124773	63	1	4
6698317	-11.7727	0.124773	64	1	4
6698317	-11.7727	0.124773	65	1	4
6698317	-11.7727	0.124773	66	1	4
6698317	-11.7727	0.124773	67	1	4
6698317	-11.7727	0.124773	68	0	3
6698317	-11.7727	0.124773	69	1	3
6698317	-11.7727	0.124773	70	1	5
6698317	-11.7727	0.124773	71	1	5
6698317	-11.7727	0.124773	72	1	3
6698317	-11.7727	0.124773	73	1	4
6698317	-11.7727	0.124773	74	1	5
6698317	-11.7727	0.124773	75	1	4
6698317	-11.7727	0.124773	76	1	5
6698317	-11.7727	0.124773	77	1	5
6698317	-11.7727	0.124773	78	1	5
6698317	-11.7727	0.124773	79	1	5
6698317	-11.7727	0.124773	80	1	5
6698317	-11.7727	0.124773	81	1	3
6698317	-11.7727	0.124773	82	1	5
6698317	-11.7727	0.124773	83	1	4
6698317	-11.7727	0.124773	84	1	4
6698318	-17.7727	0.0747727	1	1	5
6698318	-17.7727	0.0747727	2	1	2
6698318	-17.7727	0.0747727	3	1	4
6698318	-17.7727	0.0747727	4	0	3
6698318	-17.7727	0.0747727	5	0	5
6698318	-17.7727	0.0747727	6	1	4
6698318	-17.7727	0.0747727	7	1	3
6698318	-17.7727	0.0747727	8	0	4
6698318	-17.7727	0.0747727	9	1	5
6698318	-17.7727	0.0747727	10	0	5
6698318	-17.7727	0.0747727	11	1	4
6698318	-17.7727	0.0747727	12	1	5
6698318	-17.7727	0.0747727	13	0	5
6698318	-17.7727	0.0747727	14	1	5
6698318	-17.7727	0.0747727	15	1	4
6698318	-17.7727	0.0747727	16	1	5
6698318	-17.7727	0.0747727	17	1	5
6698318	-17.7727	0.0747727	18	0	5
6698318	-17.7727	0.0747727	19	1	5
6698318	-17.7727	0.0747727	20	1	4
6698318	-17.7727	0.0747727	21	1	4
6698318	-17.7727	0.0747727	22	0	5
6698318	-17.7727	0.0747727	23	1	4
6698318	-17.7727	0.0747727	24	1	3
6698318	-17.7727	0.0747727	25	0	5
6698318	-17.7727	0.0747727	26	1	5
6698318	-17.7727	0.0747727	27	0	5
6698318	-17.7727	0.0747727	28	0	3
6698318	-17.7727	0.0747727	29	1	5
6698318	-17.7727	0.0747727	30	1	5
6698318	-17.7727	0.0747727	31	0	5
6698318	-17.7727	0.0747727	32	1	4
6698318	-17.7727	0.0747727	33	0	4
6698318	-17.7727	0.0747727	34	0	5
6698318	-17.7727	0.0747727	35	1	4
6698318	-17.7727	0.0747727	36	0	4
6698318	-17.7727	0.0747727	37	0	5
6698318	-17.7727	0.0747727	38	1	5
6698318	-17.7727	0.0747727	39	0	5
6698318	-17.7727	0.0747727	40	1	5
6698318	-17.7727	0.0747727	41	0	5
6698318	-17.7727	0.0747727	42	0	5
6698318	-17.7727	0.0747727	43	1	5
6698318	-17.7727	0.0747727	44	1	5
6698318	-17.7727	0.0747727	45	1	4
6698318	-17.7727	0.0747727	46	1	3
6698318	-17.7727	0.0747727	47	1	5
6698318	-17.7727	0.0747727	48	1	5
6698318	-17.7727	0.0747727	49	1	5
6698318	-17.7727	0.0747727	50	1	5
6698318	-17.7727	0.0747727	51	1	5
6698318	-17.7727	0.0747727	52	1	5
6698318	-17.7727	0.0747727	53	1	5
6698318	-17.7727	0.0747727	54	1	5
6698318	-17.7727	0.0747727	55	1	4
6698318	-17.7727	0.0747727	56	1	5
6698318	-17.7727	0.0747727	57	1	5
6698318	-17.7727	0.0747727	58	1	4
6698318	-17.7727	0.0747727	59	1	5
6698318	-17.7727	0.0747727	60	1	5
6698318	-17.7727	0.0747727	61	1	4
6698318	-17.7727	0.0747727	62	1	5
6698318	-17.7727	0.0747727	63	1	5
6698318	-17.7727	0.0747727	64	1	5
6698318	-17.7727	0.0747727	65	1	5
6698318	-17.7727	0.0747727	66	1	5
6698318	-17.7727	0.0747727	67	1	5
6698318	-17.7727	0.0747727	68	1	5
6698318	-17.7727	0.0747727	69	1	5
6698318	-17.7727	0.0747727	70	1	5
6698318	-17.7727	0.0747727	71	1	5
6698318	-17.7727	0.0747727	72	1	5
6698318	-17.7727	0.0747727	73	1	4
6698318	-17.7727	0.0747727	74	1	5
6698318	-17.7727	0.0747727	75	1	5
6698318	-17.7727	0.0747727	76	1	5
6698318	-17.7727	0.0747727	77	1	4
6698318	-17.7727	0.0747727	78	1	5
6698318	-17.7727	0.0747727	79	1	5
6698318	-17.7727	0.0747727	80	1	5
6698318	-17.7727	0.0747727	81	1	4
6698318	-17.7727	0.0747727	82	1	5
6698318	-17.7727	0.0747727	83	1	5
6698318	-17.7727	0.0747727	84	1	3
6698323	10.2273	0.124773	1	1	5
6698323	10.2273	0.124773	2	0	4
6698323	10.2273	0.124773	3	1	5
6698323	10.2273	0.124773	4	0	4
6698323	10.2273	0.124773	5	1	5
6698323	10.2273	0.124773	6	1	4
6698323	10.2273	0.124773	7	0	4
6698323	10.2273	0.124773	8	0	4
6698323	10.2273	0.124773	9	1	5
6698323	10.2273	0.124773	10	1	5
6698323	10.2273	0.124773	11	1	5
6698323	10.2273	0.124773	12	1	5
6698323	10.2273	0.124773	13	1	5
6698323	10.2273	0.124773	14	1	5
6698323	10.2273	0.124773	15	0	5
6698323	10.2273	0.124773	16	1	5
6698323	10.2273	0.124773	17	1	5
6698323	10.2273	0.124773	18	0	4
6698323	10.2273	0.124773	19	1	5
6698323	10.2273	0.124773	20	1	5
6698323	10.2273	0.124773	21	0	5
6698323	10.2273	0.124773	22	1	5
6698323	10.2273	0.124773	23	1	3
6698323	10.2273	0.124773	24	1	5
6698323	10.2273	0.124773	25	0	4
6698323	10.2273	0.124773	26	1	5
6698323	10.2273	0.124773	27	1	4
6698323	10.2273	0.124773	28	1	5
6698323	10.2273	0.124773	29	1	5
6698323	10.2273	0.124773	30	1	5
6698323	10.2273	0.124773	31	0	4
6698323	10.2273	0.124773	32	1	5
6698323	10.2273	0.124773	33	1	5
6698323	10.2273	0.124773	34	0	5
6698323	10.2273	0.124773	35	1	4
6698323	10.2273	0.124773	36	0	5
6698323	10.2273	0.124773	37	1	5
6698323	10.2273	0.124773	38	1	5
6698323	10.2273	0.124773	39	1	5
6698323	10.2273	0.124773	40	1	5
6698323	10.2273	0.124773	41	1	5
6698323	10.2273	0.124773	42	1	5
6698323	10.2273	0.124773	43	1	4
6698323	10.2273	0.124773	44	1	4
6698323	10.2273	0.124773	45	1	5
6698323	10.2273	0.124773	46	1	1
6698323	10.2273	0.124773	47	1	5
6698323	10.2273	0.124773	48	1	4
6698323	10.2273	0.124773	49	1	5
6698323	10.2273	0.124773	50	1	4
6698323	10.2273	0.124773	51	1	4
6698323	10.2273	0.124773	52	0	4
6698323	10.2273	0.124773	53	1	4
6698323	10.2273	0.124773	54	1	5
6698323	10.2273	0.124773	55	0	5
6698323	10.2273	0.124773	56	1	4
6698323	10.2273	0.124773	57	1	4
6698323	10.2273	0.124773	58	0	4
6698323	10.2273	0.124773	59	1	4
6698323	10.2273	0.124773	60	1	5
6698323	10.2273	0.124773	61	1	3
6698323	10.2273	0.124773	62	1	5
6698323	10.2273	0.124773	63	1	4
6698323	10.2273	0.124773	64	1	4
6698323	10.2273	0.124773	65	1	5
6698323	10.2273	0.124773	66	1	5
6698323	10.2273	0.124773	67	1	5
6698323	10.2273	0.124773	68	1	5
6698323	10.2273	0.124773	69	1	4
6698323	10.2273	0.124773	70	1	4
6698323	10.2273	0.124773	71	1	4
6698323	10.2273	0.124773	72	1	4
6698323	10.2273	0.124773	73	1	5
6698323	10.2273	0.124773	74	1	4
6698323	10.2273	0.124773	75	1	4
6698323	10.2273	0.124773	76	1	4
6698323	10.2273	0.124773	77	1	5
6698323	10.2273	0.124773	78	1	4
6698323	10.2273	0.124773	79	1	5
6698323	10.2273	0.124773	80	1	4
6698323	10.2273	0.124773	81	1	4
6698323	10.2273	0.124773	82	1	4
6698323	10.2273	0.124773	83	1	5
6698323	10.2273	0.124773	84	1	4
6698346	-15.7727	0.224773	1	1	5
6698346	-15.7727	0.224773	2	1	2
6698346	-15.7727	0.224773	3	0	5
6698346	-15.7727	0.224773	4	0	3
6698346	-15.7727	0.224773	5	0	4
6698346	-15.7727	0.224773	6	0	5
6698346	-15.7727	0.224773	7	0	5
6698346	-15.7727	0.224773	8	0	2
6698346	-15.7727	0.224773	9	1	1
6698346	-15.7727	0.224773	10	1	4
6698346	-15.7727	0.224773	11	1	4
6698346	-15.7727	0.224773	12	1	5
6698346	-15.7727	0.224773	13	0	1
6698346	-15.7727	0.224773	14	1	2
6698346	-15.7727	0.224773	15	1	4
6698346	-15.7727	0.224773	16	1	4
6698346	-15.7727	0.224773	17	1	5
6698346	-15.7727	0.224773	18	1	2
6698346	-15.7727	0.224773	19	1	5
6698346	-15.7727	0.224773	20	1	5
6698346	-15.7727	0.224773	21	1	2
6698346	-15.7727	0.224773	22	0	5
6698346	-15.7727	0.224773	23	1	3
6698346	-15.7727	0.224773	24	0	3
6698346	-15.7727	0.224773	25	0	5
6698346	-15.7727	0.224773	26	1	4
6698346	-15.7727	0.224773	27	1	3
6698346	-15.7727	0.224773	28	1	1
6698346	-15.7727	0.224773	29	1	4
6698346	-15.7727	0.224773	30	1	4
6698346	-15.7727	0.224773	31	0	2
6698346	-15.7727	0.224773	32	1	3
6698346	-15.7727	0.224773	33	1	3
6698346	-15.7727	0.224773	34	1	3
6698346	-15.7727	0.224773	35	0	4
6698346	-15.7727	0.224773	36	1	2
6698346	-15.7727	0.224773	37	1	1
6698346	-15.7727	0.224773	38	1	5
6698346	-15.7727	0.224773	39	0	1
6698346	-15.7727	0.224773	40	1	2
6698346	-15.7727	0.224773	41	1	3
6698346	-15.7727	0.224773	42	0	4
6698346	-15.7727	0.224773	43	1	5
6698346	-15.7727	0.224773	44	1	5
6698346	-15.7727	0.224773	45	1	3
6698346	-15.7727	0.224773	46	1	2
6698346	-15.7727	0.224773	47	1	5
6698346	-15.7727	0.224773	48	1	4
6698346	-15.7727	0.224773	49	1	5
6698346	-15.7727	0.224773	50	1	5
6698346	-15.7727	0.224773	51	0	4
6698346	-15.7727	0.224773	52	1	3
6698346	-15.7727	0.224773	53	1	5
6698346	-15.7727	0.224773	54	1	5
6698346	-15.7727	0.224773	55	1	5
6698346	-15.7727	0.224773	56	1	5
6698346	-15.7727	0.224773	57	1	5
6698346	-15.7727	0.224773	58	1	4
6698346	-15.7727	0.224773	59	1	5
6698346	-15.7727	0.224773	60	1	5
6698346	-15.7727	0.224773	61	1	5
6698346	-15.7727	0.224773	62	1	5
6698346	-15.7727	0.224773	63	1	5
6698346	-15.7727	0.224773	64	1	5
6698346	-15.7727	0.224773	65	1	5
6698346	-15.7727	0.224773	66	1	4
6698346	-15.7727	0.224773	67	1	4
6698346	-15.7727	0.224773	68	1	5
6698346	-15.7727	0.224773	69	1	5
6698346	-15.7727	0.224773	70	1	3
6698346	-15.7727	0.224773	71	1	5
6698346	-15.7727	0.224773	72	1	5
6698346	-15.7727	0.224773	73	1	5
6698346	-15.7727	0.224773	74	1	4
6698346	-15.7727	0.224773	75	1	4
6698346	-15.7727	0.224773	76	1	5
6698346	-15.7727	0.224773	77	1	4
6698346	-15.7727	0.224773	78	1	5
6698346	-15.7727	0.224773	79	1	5
6698346	-15.7727	0.224773	80	1	5
6698346	-15.7727	0.224773	81	1	5
6698346	-15.7727	0.224773	82	1	5
6698346	-15.7727	0.224773	83	1	5
6698346	-15.7727	0.224773	84	1	4
6698349	-11.7727	0.124773	1	1	5
6698349	-11.7727	0.124773	2	1	2
6698349	-11.7727	0.124773	3	0	3
6698349	-11.7727	0.124773	4	1	3
6698349	-11.7727	0.124773	5	1	2
6698349	-11.7727	0.124773	6	1	5
6698349	-11.7727	0.124773	7	1	4
6698349	-11.7727	0.124773	8	1	5
6698349	-11.7727	0.124773	9	1	5
6698349	-11.7727	0.124773	10	1	4
6698349	-11.7727	0.124773	11	1	5
6698349	-11.7727	0.124773	12	1	4
6698349	-11.7727	0.124773	13	1	5
6698349	-11.7727	0.124773	14	1	5
6698349	-11.7727	0.124773	15	1	4
6698349	-11.7727	0.124773	16	1	4
6698349	-11.7727	0.124773	17	1	5
6698349	-11.7727	0.124773	18	1	5
6698349	-11.7727	0.124773	19	1	4
6698349	-11.7727	0.124773	20	1	5
6698349	-11.7727	0.124773	21	1	1
6698349	-11.7727	0.124773	22	1	5
6698349	-11.7727	0.124773	23	1	5
6698349	-11.7727	0.124773	24	0	3
6698349	-11.7727	0.124773	25	1	4
6698349	-11.7727	0.124773	26	1	1
6698349	-11.7727	0.124773	27	1	4
6698349	-11.7727	0.124773	28	1	5
6698349	-11.7727	0.124773	29	1	4
6698349	-11.7727	0.124773	30	1	5
6698349	-11.7727	0.124773	31	1	4
6698349	-11.7727	0.124773	32	1	5
6698349	-11.7727	0.124773	33	1	3
6698349	-11.7727	0.124773	34	1	2
6698349	-11.7727	0.124773	35	1	3
6698349	-11.7727	0.124773	36	0	1
6698349	-11.7727	0.124773	37	1	5
6698349	-11.7727	0.124773	38	1	5
6698349	-11.7727	0.124773	39	1	5
6698349	-11.7727	0.124773	40	1	4
6698349	-11.7727	0.124773	41	1	5
6698349	-11.7727	0.124773	42	1	4
6698349	-11.7727	0.124773	43	0	2
6698349	-11.7727	0.124773	44	1	5
6698349	-11.7727	0.124773	45	1	4
6698349	-11.7727	0.124773	46	0	5
6698349	-11.7727	0.124773	47	1	2
6698349	-11.7727	0.124773	48	1	1
6698349	-11.7727	0.124773	49	1	5
6698349	-11.7727	0.124773	50	1	5
6698349	-11.7727	0.124773	51	0	5
6698349	-11.7727	0.124773	52	0	3
6698349	-11.7727	0.124773	53	1	4
6698349	-11.7727	0.124773	54	0	1
6698349	-11.7727	0.124773	55	1	5
6698349	-11.7727	0.124773	56	1	5
6698349	-11.7727	0.124773	57	1	1
6698349	-11.7727	0.124773	58	0	1
6698349	-11.7727	0.124773	59	1	4
6698349	-11.7727	0.124773	60	1	1
6698349	-11.7727	0.124773	61	0	1
6698349	-11.7727	0.124773	62	1	3
6698349	-11.7727	0.124773	63	1	2
6698349	-11.7727	0.124773	64	1	1
6698349	-11.7727	0.124773	65	1	0
6698349	-11.7727	0.124773	66	1	5
6698349	-11.7727	0.124773	67	1	4
6698349	-11.7727	0.124773	68	1	3
6698349	-11.7727	0.124773	69	1	5
6698349	-11.7727	0.124773	70	1	5
6698349	-11.7727	0.124773	71	1	4
6698349	-11.7727	0.124773	72	1	4
6698349	-11.7727	0.124773	73	1	5
6698349	-11.7727	0.124773	74	1	0
6698349	-11.7727	0.124773	75	1	2
6698349	-11.7727	0.124773	76	1	4
6698349	-11.7727	0.124773	77	1	3
6698349	-11.7727	0.124773	78	1	4
6698349	-11.7727	0.124773	79	1	4
6698349	-11.7727	0.124773	80	1	4
6698349	-11.7727	0.124773	81	1	4
6698349	-11.7727	0.124773	82	1	3
6698349	-11.7727	0.124773	83	1	1
6698349	-11.7727	0.124773	84	0	2
6698356	-3.77273	-0.0252273	1	1	5
6698356	-3.77273	-0.0252273	2	0	5
6698356	-3.77273	-0.0252273	3	0	4
6698356	-3.77273	-0.0252273	4	1	5
6698356	-3.77273	-0.0252273	5	1	4
6698356	-3.77273	-0.0252273	6	0	5
6698356	-3.77273	-0.0252273	7	1	5
6698356	-3.77273	-0.0252273	8	1	5
6698356	-3.77273	-0.0252273	9	1	5
6698356	-3.77273	-0.0252273	10	0	5
6698356	-3.77273	-0.0252273	11	0	4
6698356	-3.77273	-0.0252273	12	1	5
6698356	-3.77273	-0.0252273	13	1	5
6698356	-3.77273	-0.0252273	14	1	5
6698356	-3.77273	-0.0252273	15	1	4
6698356	-3.77273	-0.0252273	16	1	5
6698356	-3.77273	-0.0252273	17	1	5
6698356	-3.77273	-0.0252273	18	1	5
6698356	-3.77273	-0.0252273	19	1	5
6698356	-3.77273	-0.0252273	20	0	3
6698356	-3.77273	-0.0252273	21	0	5
6698356	-3.77273	-0.0252273	22	1	5
6698356	-3.77273	-0.0252273	23	1	5
6698356	-3.77273	-0.0252273	24	0	5
6698356	-3.77273	-0.0252273	25	0	5
6698356	-3.77273	-0.0252273	26	1	5
6698356	-3.77273	-0.0252273	27	1	5
6698356	-3.77273	-0.0252273	28	1	5
6698356	-3.77273	-0.0252273	29	1	5
6698356	-3.77273	-0.0252273	30	1	5
6698356	-3.77273	-0.0252273	31	1	4
6698356	-3.77273	-0.0252273	32	1	4
6698356	-3.77273	-0.0252273	33	1	5
6698356	-3.77273	-0.0252273	34	0	5
6698356	-3.77273	-0.0252273	35	1	4
6698356	-3.77273	-0.0252273	36	1	5
6698356	-3.77273	-0.0252273	37	1	4
6698356	-3.77273	-0.0252273	38	1	5
6698356	-3.77273	-0.0252273	39	1	5
6698356	-3.77273	-0.0252273	40	1	5
6698356	-3.77273	-0.0252273	41	1	5
6698356	-3.77273	-0.0252273	42	1	4
6698356	-3.77273	-0.0252273	43	0	4
6698356	-3.77273	-0.0252273	44	1	5
6698356	-3.77273	-0.0252273	45	1	5
6698356	-3.77273	-0.0252273	46	0	4
6698356	-3.77273	-0.0252273	47	1	5
6698356	-3.77273	-0.0252273	48	1	4
6698356	-3.77273	-0.0252273	49	0	4
6698356	-3.77273	-0.0252273	50	1	2
6698356	-3.77273	-0.0252273	51	0	5
6698356	-3.77273	-0.0252273	52	1	5
6698356	-3.77273	-0.0252273	53	0	5
6698356	-3.77273	-0.0252273	54	0	5
6698356	-3.77273	-0.0252273	55	0	5
6698356	-3.77273	-0.0252273	56	1	5
6698356	-3.77273	-0.0252273	57	0	5
6698356	-3.77273	-0.0252273	58	0	4
6698356	-3.77273	-0.0252273	59	1	5
6698356	-3.77273	-0.0252273	60	1	5
6698356	-3.77273	-0.0252273	61	0	5
6698356	-3.77273	-0.0252273	62	1	4
6698356	-3.77273	-0.0252273	63	0	5
6698356	-3.77273	-0.0252273	64	1	5
6698356	-3.77273	-0.0252273	65	1	4
6698356	-3.77273	-0.0252273	66	1	5
6698356	-3.77273	-0.0252273	67	1	4
6698356	-3.77273	-0.0252273	68	0	4
6698356	-3.77273	-0.0252273	69	1	5
6698356	-3.77273	-0.0252273	70	1	5
6698356	-3.77273	-0.0252273	71	0	5
6698356	-3.77273	-0.0252273	72	0	5
6698356	-3.77273	-0.0252273	73	1	5
6698356	-3.77273	-0.0252273	74	0	5
6698356	-3.77273	-0.0252273	75	0	5
6698356	-3.77273	-0.0252273	76	0	5
6698356	-3.77273	-0.0252273	77	1	5
6698356	-3.77273	-0.0252273	78	1	5
6698356	-3.77273	-0.0252273	79	0	5
6698356	-3.77273	-0.0252273	80	1	5
6698356	-3.77273	-0.0252273	81	1	5
6698356	-3.77273	-0.0252273	82	1	5
6698356	-3.77273	-0.0252273	83	0	5
6698356	-3.77273	-0.0252273	84	0	5
6698374	-1.77273	0.0747727	1	1	4
6698374	-1.77273	0.0747727	2	0	4
6698374	-1.77273	0.0747727	3	0	4
6698374	-1.77273	0.0747727	4	1	4
6698374	-1.77273	0.0747727	5	0	4
6698374	-1.77273	0.0747727	6	1	3
6698374	-1.77273	0.0747727	7	1	4
6698374	-1.77273	0.0747727	8	1	4
6698374	-1.77273	0.0747727	9	0	4
6698374	-1.77273	0.0747727	10	1	3
6698374	-1.77273	0.0747727	11	1	4
6698374	-1.77273	0.0747727	12	1	4
6698374	-1.77273	0.0747727	13	1	4
6698374	-1.77273	0.0747727	14	0	4
6698374	-1.77273	0.0747727	15	1	4
6698374	-1.77273	0.0747727	16	0	4
6698374	-1.77273	0.0747727	17	1	4
6698374	-1.77273	0.0747727	18	0	4
6698374	-1.77273	0.0747727	19	1	4
6698374	-1.77273	0.0747727	20	1	4
6698374	-1.77273	0.0747727	21	0	4
6698374	-1.77273	0.0747727	22	1	4
6698374	-1.77273	0.0747727	23	1	4
6698374	-1.77273	0.0747727	24	0	4
6698374	-1.77273	0.0747727	25	0	3
6698374	-1.77273	0.0747727	26	1	4
6698374	-1.77273	0.0747727	27	0	4
6698374	-1.77273	0.0747727	28	0	4
6698374	-1.77273	0.0747727	29	1	4
6698374	-1.77273	0.0747727	30	1	4
6698374	-1.77273	0.0747727	31	0	4
6698374	-1.77273	0.0747727	32	1	4
6698374	-1.77273	0.0747727	33	1	4
6698374	-1.77273	0.0747727	34	0	4
6698374	-1.77273	0.0747727	35	1	4
6698374	-1.77273	0.0747727	36	0	4
6698374	-1.77273	0.0747727	37	1	4
6698374	-1.77273	0.0747727	38	1	4
6698374	-1.77273	0.0747727	39	1	4
6698374	-1.77273	0.0747727	40	0	3
6698374	-1.77273	0.0747727	41	1	4
6698374	-1.77273	0.0747727	42	1	4
6698374	-1.77273	0.0747727	43	0	4
6698374	-1.77273	0.0747727	44	0	4
6698374	-1.77273	0.0747727	45	1	3
6698374	-1.77273	0.0747727	46	1	3
6698374	-1.77273	0.0747727	47	1	4
6698374	-1.77273	0.0747727	48	1	4
6698374	-1.77273	0.0747727	49	1	4
6698374	-1.77273	0.0747727	50	1	3
6698374	-1.77273	0.0747727	51	1	4
6698374	-1.77273	0.0747727	52	1	4
6698374	-1.77273	0.0747727	53	1	4
6698374	-1.77273	0.0747727	54	1	4
6698374	-1.77273	0.0747727	55	0	4
6698374	-1.77273	0.0747727	56	1	4
6698374	-1.77273	0.0747727	57	1	4
6698374	-1.77273	0.0747727	58	1	4
6698374	-1.77273	0.0747727	59	1	3
6698374	-1.77273	0.0747727	60	1	4
6698374	-1.77273	0.0747727	61	1	4
6698374	-1.77273	0.0747727	62	1	4
6698374	-1.77273	0.0747727	63	0	4
6698374	-1.77273	0.0747727	64	1	4
6698374	-1.77273	0.0747727	65	0	4
6698374	-1.77273	0.0747727	66	1	4
6698374	-1.77273	0.0747727	67	1	3
6698374	-1.77273	0.0747727	68	1	4
6698374	-1.77273	0.0747727	69	1	4
6698374	-1.77273	0.0747727	70	1	3
6698374	-1.77273	0.0747727	71	0	4
6698374	-1.77273	0.0747727	72	1	4
6698374	-1.77273	0.0747727	73	1	3
6698374	-1.77273	0.0747727	74	1	4
6698374	-1.77273	0.0747727	75	1	4
6698374	-1.77273	0.0747727	76	1	3
6698374	-1.77273	0.0747727	77	1	4
6698374	-1.77273	0.0747727	78	1	4
6698374	-1.77273	0.0747727	79	1	4
6698374	-1.77273	0.0747727	80	1	4
6698374	-1.77273	0.0747727	81	1	4
6698374	-1.77273	0.0747727	82	1	4
6698374	-1.77273	0.0747727	83	1	4
6698374	-1.77273	0.0747727	84	1	4
6698378	-8.77273	-0.000227273	1	1	5
6698378	-8.77273	-0.000227273	2	1	5
6698378	-8.77273	-0.000227273	3	1	4
6698378	-8.77273	-0.000227273	4	1	5
6698378	-8.77273	-0.000227273	5	0	5
6698378	-8.77273	-0.000227273	6	1	5
6698378	-8.77273	-0.000227273	7	0	5
6698378	-8.77273	-0.000227273	8	1	5
6698378	-8.77273	-0.000227273	9	1	5
6698378	-8.77273	-0.000227273	10	1	5
6698378	-8.77273	-0.000227273	11	1	5
6698378	-8.77273	-0.000227273	12	0	5
6698378	-8.77273	-0.000227273	13	0	5
6698378	-8.77273	-0.000227273	14	1	5
6698378	-8.77273	-0.000227273	15	1	5
6698378	-8.77273	-0.000227273	16	0	5
6698378	-8.77273	-0.000227273	17	1	5
6698378	-8.77273	-0.000227273	18	0	5
6698378	-8.77273	-0.000227273	19	1	5
6698378	-8.77273	-0.000227273	20	1	5
6698378	-8.77273	-0.000227273	21	1	5
6698378	-8.77273	-0.000227273	22	1	5
6698378	-8.77273	-0.000227273	23	1	5
6698378	-8.77273	-0.000227273	24	1	5
6698378	-8.77273	-0.000227273	25	1	5
6698378	-8.77273	-0.000227273	26	1	5
6698378	-8.77273	-0.000227273	27	0	5
6698378	-8.77273	-0.000227273	28	1	5
6698378	-8.77273	-0.000227273	29	1	5
6698378	-8.77273	-0.000227273	30	1	5
6698378	-8.77273	-0.000227273	31	1	5
6698378	-8.77273	-0.000227273	32	1	5
6698378	-8.77273	-0.000227273	33	0	5
6698378	-8.77273	-0.000227273	34	1	5
6698378	-8.77273	-0.000227273	35	0	5
6698378	-8.77273	-0.000227273	36	0	5
6698378	-8.77273	-0.000227273	37	1	5
6698378	-8.77273	-0.000227273	38	1	5
6698378	-8.77273	-0.000227273	39	1	5
6698378	-8.77273	-0.000227273	40	1	5
6698378	-8.77273	-0.000227273	41	1	5
6698378	-8.77273	-0.000227273	42	0	5
6698378	-8.77273	-0.000227273	43	0	5
6698378	-8.77273	-0.000227273	44	0	5
6698378	-8.77273	-0.000227273	45	0	5
6698378	-8.77273	-0.000227273	46	0	5
6698378	-8.77273	-0.000227273	47	1	5
6698378	-8.77273	-0.000227273	48	1	5
6698378	-8.77273	-0.000227273	49	1	5
6698378	-8.77273	-0.000227273	50	0	5
6698378	-8.77273	-0.000227273	51	0	5
6698378	-8.77273	-0.000227273	52	0	5
6698378	-8.77273	-0.000227273	53	0	5
6698378	-8.77273	-0.000227273	54	1	5
6698378	-8.77273	-0.000227273	55	1	5
6698378	-8.77273	-0.000227273	56	0	5
6698378	-8.77273	-0.000227273	57	1	5
6698378	-8.77273	-0.000227273	58	0	5
6698378	-8.77273	-0.000227273	59	1	5
6698378	-8.77273	-0.000227273	60	0	5
6698378	-8.77273	-0.000227273	61	0	5
6698378	-8.77273	-0.000227273	62	1	5
6698378	-8.77273	-0.000227273	63	0	5
6698378	-8.77273	-0.000227273	64	1	5
6698378	-8.77273	-0.000227273	65	1	5
6698378	-8.77273	-0.000227273	66	1	5
6698378	-8.77273	-0.000227273	67	1	5
6698378	-8.77273	-0.000227273	68	1	5
6698378	-8.77273	-0.000227273	69	1	5
6698378	-8.77273	-0.000227273	70	0	5
6698378	-8.77273	-0.000227273	71	1	5
6698378	-8.77273	-0.000227273	72	0	5
6698378	-8.77273	-0.000227273	73	1	5
6698378	-8.77273	-0.000227273	74	1	5
6698378	-8.77273	-0.000227273	75	0	5
6698378	-8.77273	-0.000227273	76	1	5
6698378	-8.77273	-0.000227273	77	0	5
6698378	-8.77273	-0.000227273	78	1	5
6698378	-8.77273	-0.000227273	79	0	5
6698378	-8.77273	-0.000227273	80	1	5
6698378	-8.77273	-0.000227273	81	1	5
6698378	-8.77273	-0.000227273	82	1	5
6698378	-8.77273	-0.000227273	83	1	5
6698378	-8.77273	-0.000227273	84	1	5
6698430	-25.7727	0.199773	1	1	5
6698430	-25.7727	0.199773	2	1	2
6698430	-25.7727	0.199773	3	0	5
6698430	-25.7727	0.199773	4	0	3
6698430	-25.7727	0.199773	5	1	2
6698430	-25.7727	0.199773	6	1	5
6698430	-25.7727	0.199773	7	1	5
6698430	-25.7727	0.199773	8	1	5
6698430	-25.7727	0.199773	9	1	5
6698430	-25.7727	0.199773	10	1	4
6698430	-25.7727	0.199773	11	1	5
6698430	-25.7727	0.199773	12	1	4
6698430	-25.7727	0.199773	13	1	5
6698430	-25.7727	0.199773	14	1	4
6698430	-25.7727	0.199773	15	1	5
6698430	-25.7727	0.199773	16	1	5
6698430	-25.7727	0.199773	17	1	5
6698430	-25.7727	0.199773	18	1	2
6698430	-25.7727	0.199773	19	1	5
6698430	-25.7727	0.199773	20	1	5
6698430	-25.7727	0.199773	21	1	4
6698430	-25.7727	0.199773	22	1	3
6698430	-25.7727	0.199773	23	1	5
6698430	-25.7727	0.199773	24	1	5
6698430	-25.7727	0.199773	25	0	3
6698430	-25.7727	0.199773	26	1	4
6698430	-25.7727	0.199773	27	1	4
6698430	-25.7727	0.199773	28	1	3
6698430	-25.7727	0.199773	29	1	5
6698430	-25.7727	0.199773	30	1	5
6698430	-25.7727	0.199773	31	1	5
6698430	-25.7727	0.199773	32	1	4
6698430	-25.7727	0.199773	33	1	3
6698430	-25.7727	0.199773	34	1	3
6698430	-25.7727	0.199773	35	1	5
6698430	-25.7727	0.199773	36	1	4
6698430	-25.7727	0.199773	37	1	4
6698430	-25.7727	0.199773	38	1	5
6698430	-25.7727	0.199773	39	1	0
6698430	-25.7727	0.199773	40	1	5
6698430	-25.7727	0.199773	41	1	5
6698430	-25.7727	0.199773	42	1	5
6698430	-25.7727	0.199773	43	1	5
6698430	-25.7727	0.199773	44	1	5
6698430	-25.7727	0.199773	45	1	5
6698430	-25.7727	0.199773	46	1	5
6698430	-25.7727	0.199773	47	1	5
6698430	-25.7727	0.199773	48	1	5
6698430	-25.7727	0.199773	49	1	5
6698430	-25.7727	0.199773	50	1	5
6698430	-25.7727	0.199773	51	0	4
6698430	-25.7727	0.199773	52	1	5
6698430	-25.7727	0.199773	53	1	5
6698430	-25.7727	0.199773	54	1	5
6698430	-25.7727	0.199773	55	1	2
6698430	-25.7727	0.199773	56	1	5
6698430	-25.7727	0.199773	57	0	4
6698430	-25.7727	0.199773	58	1	4
6698430	-25.7727	0.199773	59	1	5
6698430	-25.7727	0.199773	60	1	5
6698430	-25.7727	0.199773	61	1	5
6698430	-25.7727	0.199773	62	1	5
6698430	-25.7727	0.199773	63	1	2
6698430	-25.7727	0.199773	64	1	5
6698430	-25.7727	0.199773	65	1	4
6698430	-25.7727	0.199773	66	1	5
6698430	-25.7727	0.199773	67	1	5
6698430	-25.7727	0.199773	68	1	5
6698430	-25.7727	0.199773	69	1	5
6698430	-25.7727	0.199773	70	1	5
6698430	-25.7727	0.199773	71	1	5
6698430	-25.7727	0.199773	72	1	5
6698430	-25.7727	0.199773	73	1	5
6698430	-25.7727	0.199773	74	1	5
6698430	-25.7727	0.199773	75	1	5
6698430	-25.7727	0.199773	76	1	5
6698430	-25.7727	0.199773	77	1	5
6698430	-25.7727	0.199773	78	1	5
6698430	-25.7727	0.199773	79	1	5
6698430	-25.7727	0.199773	80	1	5
6698430	-25.7727	0.199773	81	1	5
6698430	-25.7727	0.199773	82	1	5
6698430	-25.7727	0.199773	83	1	5
6698430	-25.7727	0.199773	84	1	5
6698472	-3.77273	0.124773	1	1	4
6698472	-3.77273	0.124773	2	0	4
6698472	-3.77273	0.124773	3	1	1
6698472	-3.77273	0.124773	4	0	4
6698472	-3.77273	0.124773	5	1	2
6698472	-3.77273	0.124773	6	0	3
6698472	-3.77273	0.124773	7	1	3
6698472	-3.77273	0.124773	8	0	3
6698472	-3.77273	0.124773	9	0	3
6698472	-3.77273	0.124773	10	1	1
6698472	-3.77273	0.124773	11	1	4
6698472	-3.77273	0.124773	12	1	3
6698472	-3.77273	0.124773	13	0	5
6698472	-3.77273	0.124773	14	0	4
6698472	-3.77273	0.124773	15	1	4
6698472	-3.77273	0.124773	16	1	2
6698472	-3.77273	0.124773	17	1	5
6698472	-3.77273	0.124773	18	0	5
6698472	-3.77273	0.124773	19	1	3
6698472	-3.77273	0.124773	20	1	1
6698472	-3.77273	0.124773	21	0	3
6698472	-3.77273	0.124773	22	1	1
6698472	-3.77273	0.124773	23	1	3
6698472	-3.77273	0.124773	24	1	5
6698472	-3.77273	0.124773	25	0	5
6698472	-3.77273	0.124773	26	1	3
6698472	-3.77273	0.124773	27	0	2
6698472	-3.77273	0.124773	28	1	3
6698472	-3.77273	0.124773	29	1	4
6698472	-3.77273	0.124773	30	1	4
6698472	-3.77273	0.124773	31	1	3
6698472	-3.77273	0.124773	32	1	1
6698472	-3.77273	0.124773	33	0	4
6698472	-3.77273	0.124773	34	0	3
6698472	-3.77273	0.124773	35	0	3
6698472	-3.77273	0.124773	36	1	3
6698472	-3.77273	0.124773	37	1	2
6698472	-3.77273	0.124773	38	1	5
6698472	-3.77273	0.124773	39	1	3
6698472	-3.77273	0.124773	40	1	2
6698472	-3.77273	0.124773	41	1	4
6698472	-3.77273	0.124773	42	1	1
6698472	-3.77273	0.124773	43	1	3
6698472	-3.77273	0.124773	44	0	1
6698472	-3.77273	0.124773	45	1	4
6698472	-3.77273	0.124773	46	1	3
6698472	-3.77273	0.124773	47	1	5
6698472	-3.77273	0.124773	48	0	2
6698472	-3.77273	0.124773	49	1	4
6698472	-3.77273	0.124773	50	1	5
6698472	-3.77273	0.124773	51	1	2
6698472	-3.77273	0.124773	52	1	5
6698472	-3.77273	0.124773	53	1	3
6698472	-3.77273	0.124773	54	1	2
6698472	-3.77273	0.124773	55	1	2
6698472	-3.77273	0.124773	56	1	3
6698472	-3.77273	0.124773	57	1	3
6698472	-3.77273	0.124773	58	1	3
6698472	-3.77273	0.124773	59	1	4
6698472	-3.77273	0.124773	60	1	5
6698472	-3.77273	0.124773	61	1	4
6698472	-3.77273	0.124773	62	0	3
6698472	-3.77273	0.124773	63	1	1
6698472	-3.77273	0.124773	64	1	5
6698472	-3.77273	0.124773	65	1	4
6698472	-3.77273	0.124773	66	0	2
6698472	-3.77273	0.124773	67	1	4
6698472	-3.77273	0.124773	68	1	5
6698472	-3.77273	0.124773	69	1	4
6698472	-3.77273	0.124773	70	1	5
6698472	-3.77273	0.124773	71	1	4
6698472	-3.77273	0.124773	72	1	3
6698472	-3.77273	0.124773	73	1	4
6698472	-3.77273	0.124773	74	1	3
6698472	-3.77273	0.124773	75	1	3
6698472	-3.77273	0.124773	76	1	2
6698472	-3.77273	0.124773	77	1	5
6698472	-3.77273	0.124773	78	1	5
6698472	-3.77273	0.124773	79	1	5
6698472	-3.77273	0.124773	80	1	5
6698472	-3.77273	0.124773	81	1	4
6698472	-3.77273	0.124773	82	1	5
6698472	-3.77273	0.124773	83	1	5
6698472	-3.77273	0.124773	84	1	3
6698477	-10.7727	-0.0252273	1	1	4
6698477	-10.7727	-0.0252273	2	1	3
6698477	-10.7727	-0.0252273	3	0	2
6698477	-10.7727	-0.0252273	4	0	2
6698477	-10.7727	-0.0252273	5	0	1
6698477	-10.7727	-0.0252273	6	0	1
6698477	-10.7727	-0.0252273	7	0	1
6698477	-10.7727	-0.0252273	8	1	3
6698477	-10.7727	-0.0252273	9	1	5
6698477	-10.7727	-0.0252273	10	0	1
6698477	-10.7727	-0.0252273	11	0	1
6698477	-10.7727	-0.0252273	12	0	1
6698477	-10.7727	-0.0252273	13	0	3
6698477	-10.7727	-0.0252273	14	0	1
6698477	-10.7727	-0.0252273	15	1	2
6698477	-10.7727	-0.0252273	16	1	4
6698477	-10.7727	-0.0252273	17	1	3
6698477	-10.7727	-0.0252273	18	0	2
6698477	-10.7727	-0.0252273	19	0	1
6698477	-10.7727	-0.0252273	20	1	2
6698477	-10.7727	-0.0252273	21	0	1
6698477	-10.7727	-0.0252273	22	1	3
6698477	-10.7727	-0.0252273	23	0	2
6698477	-10.7727	-0.0252273	24	1	3
6698477	-10.7727	-0.0252273	25	0	3
6698477	-10.7727	-0.0252273	26	1	3
6698477	-10.7727	-0.0252273	27	1	2
6698477	-10.7727	-0.0252273	28	0	1
6698477	-10.7727	-0.0252273	29	0	1
6698477	-10.7727	-0.0252273	30	1	5
6698477	-10.7727	-0.0252273	31	0	1
6698477	-10.7727	-0.0252273	32	0	1
6698477	-10.7727	-0.0252273	33	0	0
6698477	-10.7727	-0.0252273	34	0	1
6698477	-10.7727	-0.0252273	35	0	2
6698477	-10.7727	-0.0252273	36	0	1
6698477	-10.7727	-0.0252273	37	0	2
6698477	-10.7727	-0.0252273	38	0	1
6698477	-10.7727	-0.0252273	39	0	2
6698477	-10.7727	-0.0252273	40	1	4
6698477	-10.7727	-0.0252273	41	1	3
6698477	-10.7727	-0.0252273	42	1	2
6698477	-10.7727	-0.0252273	43	1	2
6698477	-10.7727	-0.0252273	44	1	1
6698477	-10.7727	-0.0252273	45	0	1
6698477	-10.7727	-0.0252273	46	1	1
6698477	-10.7727	-0.0252273	47	1	1
6698477	-10.7727	-0.0252273	48	0	2
6698477	-10.7727	-0.0252273	49	1	1
6698477	-10.7727	-0.0252273	50	1	2
6698477	-10.7727	-0.0252273	51	1	1
6698477	-10.7727	-0.0252273	52	0	2
6698477	-10.7727	-0.0252273	53	1	1
6698477	-10.7727	-0.0252273	54	1	1
6698477	-10.7727	-0.0252273	55	0	2
6698477	-10.7727	-0.0252273	56	1	1
6698477	-10.7727	-0.0252273	57	1	1
6698477	-10.7727	-0.0252273	58	1	2
6698477	-10.7727	-0.0252273	59	1	1
6698477	-10.7727	-0.0252273	60	1	1
6698477	-10.7727	-0.0252273	61	0	3
6698477	-10.7727	-0.0252273	62	1	1
6698477	-10.7727	-0.0252273	63	1	1
6698477	-10.7727	-0.0252273	64	1	1
6698477	-10.7727	-0.0252273	65	1	1
6698477	-10.7727	-0.0252273	66	1	1
6698477	-10.7727	-0.0252273	67	0	0
6698477	-10.7727	-0.0252273	68	1	1
6698477	-10.7727	-0.0252273	69	1	1
6698477	-10.7727	-0.0252273	70	1	5
6698477	-10.7727	-0.0252273	71	1	5
6698477	-10.7727	-0.0252273	72	1	4
6698477	-10.7727	-0.0252273	73	1	3
6698477	-10.7727	-0.0252273	74	1	1
6698477	-10.7727	-0.0252273	75	1	1
6698477	-10.7727	-0.0252273	76	1	2
6698477	-10.7727	-0.0252273	77	1	0
6698477	-10.7727	-0.0252273	78	1	1
6698477	-10.7727	-0.0252273	79	1	1
6698477	-10.7727	-0.0252273	80	1	2
6698477	-10.7727	-0.0252273	81	1	1
6698477	-10.7727	-0.0252273	82	1	1
6698477	-10.7727	-0.0252273	83	1	3
6698477	-10.7727	-0.0252273	84	0	4
6698479	6.22727	0.0747727	1	1	3
6698479	6.22727	0.0747727	2	1	1
6698479	6.22727	0.0747727	3	1	1
6698479	6.22727	0.0747727	4	0	1
6698479	6.22727	0.0747727	5	1	4
6698479	6.22727	0.0747727	6	1	1
6698479	6.22727	0.0747727	7	1	2
6698479	6.22727	0.0747727	8	1	4
6698479	6.22727	0.0747727	9	1	2
6698479	6.22727	0.0747727	10	1	2
6698479	6.22727	0.0747727	11	1	2
6698479	6.22727	0.0747727	12	1	3
6698479	6.22727	0.0747727	13	0	1
6698479	6.22727	0.0747727	14	1	4
6698479	6.22727	0.0747727	15	1	1
6698479	6.22727	0.0747727	16	1	2
6698479	6.22727	0.0747727	17	1	3
6698479	6.22727	0.0747727	18	1	1
6698479	6.22727	0.0747727	19	1	4
6698479	6.22727	0.0747727	20	1	1
6698479	6.22727	0.0747727	21	1	2
6698479	6.22727	0.0747727	22	1	1
6698479	6.22727	0.0747727	23	1	3
6698479	6.22727	0.0747727	24	0	1
6698479	6.22727	0.0747727	25	1	1
6698479	6.22727	0.0747727	26	1	1
6698479	6.22727	0.0747727	27	1	1
6698479	6.22727	0.0747727	28	1	1
6698479	6.22727	0.0747727	29	1	4
6698479	6.22727	0.0747727	30	1	2
6698479	6.22727	0.0747727	31	1	2
6698479	6.22727	0.0747727	32	1	3
6698479	6.22727	0.0747727	33	1	2
6698479	6.22727	0.0747727	34	1	2
6698479	6.22727	0.0747727	35	0	1
6698479	6.22727	0.0747727	36	1	3
6698479	6.22727	0.0747727	37	1	1
6698479	6.22727	0.0747727	38	1	3
6698479	6.22727	0.0747727	39	1	1
6698479	6.22727	0.0747727	40	1	1
6698479	6.22727	0.0747727	41	1	1
6698479	6.22727	0.0747727	42	1	3
6698479	6.22727	0.0747727	43	1	2
6698479	6.22727	0.0747727	44	1	2
6698479	6.22727	0.0747727	45	1	1
6698479	6.22727	0.0747727	46	1	1
6698479	6.22727	0.0747727	47	1	2
6698479	6.22727	0.0747727	48	1	2
6698479	6.22727	0.0747727	49	0	1
6698479	6.22727	0.0747727	50	0	1
6698479	6.22727	0.0747727	51	1	1
6698479	6.22727	0.0747727	52	1	1
6698479	6.22727	0.0747727	53	1	1
6698479	6.22727	0.0747727	54	0	1
6698479	6.22727	0.0747727	55	0	1
6698479	6.22727	0.0747727	56	1	2
6698479	6.22727	0.0747727	57	1	1
6698479	6.22727	0.0747727	58	0	2
6698479	6.22727	0.0747727	59	1	3
6698479	6.22727	0.0747727	60	0	2
6698479	6.22727	0.0747727	61	1	2
6698479	6.22727	0.0747727	62	1	1
6698479	6.22727	0.0747727	63	1	2
6698479	6.22727	0.0747727	64	1	1
6698479	6.22727	0.0747727	65	1	1
6698479	6.22727	0.0747727	66	0	1
6698479	6.22727	0.0747727	67	1	2
6698479	6.22727	0.0747727	68	0	2
6698479	6.22727	0.0747727	69	1	3
6698479	6.22727	0.0747727	70	1	2
6698479	6.22727	0.0747727	71	1	3
6698479	6.22727	0.0747727	72	1	3
6698479	6.22727	0.0747727	73	0	1
6698479	6.22727	0.0747727	74	1	1
6698479	6.22727	0.0747727	75	1	1
6698479	6.22727	0.0747727	76	1	1
6698479	6.22727	0.0747727	77	1	2
6698479	6.22727	0.0747727	78	1	4
6698479	6.22727	0.0747727	79	0	3
6698479	6.22727	0.0747727	80	1	2
6698479	6.22727	0.0747727	81	1	1
6698479	6.22727	0.0747727	82	0	1
6698479	6.22727	0.0747727	83	1	2
6698479	6.22727	0.0747727	84	1	2
6698550	-12.7727	-0.125227	1	1	4
6698550	-12.7727	-0.125227	2	1	4
6698550	-12.7727	-0.125227	3	1	4
6698550	-12.7727	-0.125227	4	1	4
6698550	-12.7727	-0.125227	5	1	4
6698550	-12.7727	-0.125227	6	1	4
6698550	-12.7727	-0.125227	7	1	3
6698550	-12.7727	-0.125227	8	1	4
6698550	-12.7727	-0.125227	9	1	5
6698550	-12.7727	-0.125227	10	1	4
6698550	-12.7727	-0.125227	11	1	4
6698550	-12.7727	-0.125227	12	1	4
6698550	-12.7727	-0.125227	13	1	4
6698550	-12.7727	-0.125227	14	1	4
6698550	-12.7727	-0.125227	15	1	4
6698550	-12.7727	-0.125227	16	1	4
6698550	-12.7727	-0.125227	17	1	4
6698550	-12.7727	-0.125227	18	1	5
6698550	-12.7727	-0.125227	19	1	4
6698550	-12.7727	-0.125227	20	1	4
6698550	-12.7727	-0.125227	21	1	4
6698550	-12.7727	-0.125227	22	1	4
6698550	-12.7727	-0.125227	23	1	4
6698550	-12.7727	-0.125227	24	1	4
6698550	-12.7727	-0.125227	25	1	4
6698550	-12.7727	-0.125227	26	1	4
6698550	-12.7727	-0.125227	27	1	4
6698550	-12.7727	-0.125227	28	1	4
6698550	-12.7727	-0.125227	29	1	4
6698550	-12.7727	-0.125227	30	1	4
6698550	-12.7727	-0.125227	31	1	4
6698550	-12.7727	-0.125227	32	1	3
6698550	-12.7727	-0.125227	33	1	4
6698550	-12.7727	-0.125227	34	0	4
6698550	-12.7727	-0.125227	35	1	4
6698550	-12.7727	-0.125227	36	1	4
6698550	-12.7727	-0.125227	37	1	4
6698550	-12.7727	-0.125227	38	1	5
6698550	-12.7727	-0.125227	39	1	4
6698550	-12.7727	-0.125227	40	1	4
6698550	-12.7727	-0.125227	41	1	3
6698550	-12.7727	-0.125227	42	1	4
6698550	-12.7727	-0.125227	43	0	4
6698550	-12.7727	-0.125227	44	0	4
6698550	-12.7727	-0.125227	45	0	4
6698550	-12.7727	-0.125227	46	0	4
6698550	-12.7727	-0.125227	47	0	4
6698550	-12.7727	-0.125227	48	0	4
6698550	-12.7727	-0.125227	49	0	4
6698550	-12.7727	-0.125227	50	0	4
6698550	-12.7727	-0.125227	51	0	4
6698550	-12.7727	-0.125227	52	0	4
6698550	-12.7727	-0.125227	53	0	4
6698550	-12.7727	-0.125227	54	0	4
6698550	-12.7727	-0.125227	55	0	4
6698550	-12.7727	-0.125227	56	0	4
6698550	-12.7727	-0.125227	57	0	3
6698550	-12.7727	-0.125227	58	0	4
6698550	-12.7727	-0.125227	59	0	4
6698550	-12.7727	-0.125227	60	0	3
6698550	-12.7727	-0.125227	61	0	5
6698550	-12.7727	-0.125227	62	1	4
6698550	-12.7727	-0.125227	63	0	5
6698550	-12.7727	-0.125227	64	1	4
6698550	-12.7727	-0.125227	65	0	4
6698550	-12.7727	-0.125227	66	0	3
6698550	-12.7727	-0.125227	67	0	4
6698550	-12.7727	-0.125227	68	1	5
6698550	-12.7727	-0.125227	69	0	4
6698550	-12.7727	-0.125227	70	0	4
6698550	-12.7727	-0.125227	71	0	4
6698550	-12.7727	-0.125227	72	0	4
6698550	-12.7727	-0.125227	73	0	4
6698550	-12.7727	-0.125227	74	0	4
6698550	-12.7727	-0.125227	75	0	3
6698550	-12.7727	-0.125227	76	0	4
6698550	-12.7727	-0.125227	77	0	4
6698550	-12.7727	-0.125227	78	0	4
6698550	-12.7727	-0.125227	79	0	4
6698550	-12.7727	-0.125227	80	0	4
6698550	-12.7727	-0.125227	81	0	4
6698550	-12.7727	-0.125227	82	0	4
6698550	-12.7727	-0.125227	83	0	4
6698550	-12.7727	-0.125227	84	0	4
6698582	10.2273	-0.100227	1	1	5
6698582	10.2273	-0.100227	2	0	4
6698582	10.2273	-0.100227	3	0	3
6698582	10.2273	-0.100227	4	1	3
6698582	10.2273	-0.100227	5	0	5
6698582	10.2273	-0.100227	6	0	2
6698582	10.2273	-0.100227	7	0	3
6698582	10.2273	-0.100227	8	0	4
6698582	10.2273	-0.100227	9	0	4
6698582	10.2273	-0.100227	10	1	3
6698582	10.2273	-0.100227	11	0	1
6698582	10.2273	-0.100227	12	1	4
6698582	10.2273	-0.100227	13	1	3
6698582	10.2273	-0.100227	14	0	3
6698582	10.2273	-0.100227	15	0	2
6698582	10.2273	-0.100227	16	0	2
6698582	10.2273	-0.100227	17	1	4
6698582	10.2273	-0.100227	18	0	4
6698582	10.2273	-0.100227	19	1	4
6698582	10.2273	-0.100227	20	0	3
6698582	10.2273	-0.100227	21	0	2
6698582	10.2273	-0.100227	22	0	5
6698582	10.2273	-0.100227	23	1	4
6698582	10.2273	-0.100227	24	0	5
6698582	10.2273	-0.100227	25	0	3
6698582	10.2273	-0.100227	26	0	1
6698582	10.2273	-0.100227	27	0	2
6698582	10.2273	-0.100227	28	1	4
6698582	10.2273	-0.100227	29	1	5
6698582	10.2273	-0.100227	30	0	4
6698582	10.2273	-0.100227	31	0	4
6698582	10.2273	-0.100227	32	0	2
6698582	10.2273	-0.100227	33	0	4
6698582	10.2273	-0.100227	34	0	4
6698582	10.2273	-0.100227	35	0	4
6698582	10.2273	-0.100227	36	0	4
6698582	10.2273	-0.100227	37	1	3
6698582	10.2273	-0.100227	38	1	4
6698582	10.2273	-0.100227	39	1	4
6698582	10.2273	-0.100227	40	1	4
6698582	10.2273	-0.100227	41	1	3
6698582	10.2273	-0.100227	42	1	3
6698582	10.2273	-0.100227	43	1	3
6698582	10.2273	-0.100227	44	0	5
6698582	10.2273	-0.100227	45	0	2
6698582	10.2273	-0.100227	46	1	2
6698582	10.2273	-0.100227	47	1	3
6698582	10.2273	-0.100227	48	1	3
6698582	10.2273	-0.100227	49	0	3
6698582	10.2273	-0.100227	50	1	3
6698582	10.2273	-0.100227	51	0	4
6698582	10.2273	-0.100227	52	1	3
6698582	10.2273	-0.100227	53	0	4
6698582	10.2273	-0.100227	54	0	3
6698582	10.2273	-0.100227	55	0	5
6698582	10.2273	-0.100227	56	1	3
6698582	10.2273	-0.100227	57	1	5
6698582	10.2273	-0.100227	58	0	5
6698582	10.2273	-0.100227	59	1	4
6698582	10.2273	-0.100227	60	1	1
6698582	10.2273	-0.100227	61	1	5
6698582	10.2273	-0.100227	62	0	2
6698582	10.2273	-0.100227	63	0	4
6698582	10.2273	-0.100227	64	1	5
6698582	10.2273	-0.100227	65	0	4
6698582	10.2273	-0.100227	66	1	3
6698582	10.2273	-0.100227	67	1	3
6698582	10.2273	-0.100227	68	1	3
6698582	10.2273	-0.100227	69	1	3
6698582	10.2273	-0.100227	70	1	4
6698582	10.2273	-0.100227	71	0	3
6698582	10.2273	-0.100227	72	1	3
6698582	10.2273	-0.100227	73	1	4
6698582	10.2273	-0.100227	74	1	3
6698582	10.2273	-0.100227	75	0	2
6698582	10.2273	-0.100227	76	1	2
6698582	10.2273	-0.100227	77	1	3
6698582	10.2273	-0.100227	78	0	5
6698582	10.2273	-0.100227	79	1	3
6698582	10.2273	-0.100227	80	1	3
6698582	10.2273	-0.100227	81	1	4
6698582	10.2273	-0.100227	82	0	4
6698582	10.2273	-0.100227	83	1	5
6698582	10.2273	-0.100227	84	0	5
6698606	-1.77273	0.124773	1	1	4
6698606	-1.77273	0.124773	2	0	5
6698606	-1.77273	0.124773	3	0	5
6698606	-1.77273	0.124773	4	0	5
6698606	-1.77273	0.124773	5	0	5
6698606	-1.77273	0.124773	6	1	5
6698606	-1.77273	0.124773	7	0	5
6698606	-1.77273	0.124773	8	1	4
6698606	-1.77273	0.124773	9	1	4
6698606	-1.77273	0.124773	10	1	5
6698606	-1.77273	0.124773	11	0	5
6698606	-1.77273	0.124773	12	1	5
6698606	-1.77273	0.124773	13	1	4
6698606	-1.77273	0.124773	14	0	5
6698606	-1.77273	0.124773	15	1	4
6698606	-1.77273	0.124773	16	1	3
6698606	-1.77273	0.124773	17	1	5
6698606	-1.77273	0.124773	18	0	5
6698606	-1.77273	0.124773	19	1	5
6698606	-1.77273	0.124773	20	1	4
6698606	-1.77273	0.124773	21	0	5
6698606	-1.77273	0.124773	22	1	5
6698606	-1.77273	0.124773	23	1	5
6698606	-1.77273	0.124773	24	0	5
6698606	-1.77273	0.124773	25	0	5
6698606	-1.77273	0.124773	26	0	5
6698606	-1.77273	0.124773	27	1	3
6698606	-1.77273	0.124773	28	0	5
6698606	-1.77273	0.124773	29	1	5
6698606	-1.77273	0.124773	30	1	4
6698606	-1.77273	0.124773	31	0	4
6698606	-1.77273	0.124773	32	1	3
6698606	-1.77273	0.124773	33	0	5
6698606	-1.77273	0.124773	34	1	4
6698606	-1.77273	0.124773	35	1	4
6698606	-1.77273	0.124773	36	0	5
6698606	-1.77273	0.124773	37	0	5
6698606	-1.77273	0.124773	38	1	5
6698606	-1.77273	0.124773	39	0	5
6698606	-1.77273	0.124773	40	1	4
6698606	-1.77273	0.124773	41	1	4
6698606	-1.77273	0.124773	42	1	5
6698606	-1.77273	0.124773	43	0	5
6698606	-1.77273	0.124773	44	1	5
6698606	-1.77273	0.124773	45	1	5
6698606	-1.77273	0.124773	46	0	4
6698606	-1.77273	0.124773	47	1	5
6698606	-1.77273	0.124773	48	1	5
6698606	-1.77273	0.124773	49	1	5
6698606	-1.77273	0.124773	50	1	5
6698606	-1.77273	0.124773	51	0	3
6698606	-1.77273	0.124773	52	0	5
6698606	-1.77273	0.124773	53	1	5
6698606	-1.77273	0.124773	54	0	4
6698606	-1.77273	0.124773	55	1	4
6698606	-1.77273	0.124773	56	1	5
6698606	-1.77273	0.124773	57	1	5
6698606	-1.77273	0.124773	58	1	5
6698606	-1.77273	0.124773	59	1	5
6698606	-1.77273	0.124773	60	1	5
6698606	-1.77273	0.124773	61	1	5
6698606	-1.77273	0.124773	62	1	5
6698606	-1.77273	0.124773	63	0	0
6698606	-1.77273	0.124773	64	1	5
6698606	-1.77273	0.124773	65	1	5
6698606	-1.77273	0.124773	66	1	4
6698606	-1.77273	0.124773	67	1	5
6698606	-1.77273	0.124773	68	1	5
6698606	-1.77273	0.124773	69	1	5
6698606	-1.77273	0.124773	70	1	5
6698606	-1.77273	0.124773	71	1	5
6698606	-1.77273	0.124773	72	1	5
6698606	-1.77273	0.124773	73	1	5
6698606	-1.77273	0.124773	74	0	4
6698606	-1.77273	0.124773	75	1	5
6698606	-1.77273	0.124773	76	1	5
6698606	-1.77273	0.124773	77	1	4
6698606	-1.77273	0.124773	78	0	3
6698606	-1.77273	0.124773	79	1	5
6698606	-1.77273	0.124773	80	1	5
6698606	-1.77273	0.124773	81	1	5
6698606	-1.77273	0.124773	82	1	5
6698606	-1.77273	0.124773	83	1	4
6698606	-1.77273	0.124773	84	1	5
6698628	24.2273	-0.0502273	1	0	5
6698628	24.2273	-0.0502273	2	0	5
6698628	24.2273	-0.0502273	3	0	2
6698628	24.2273	-0.0502273	4	1	5
6698628	24.2273	-0.0502273	5	0	5
6698628	24.2273	-0.0502273	6	1	5
6698628	24.2273	-0.0502273	7	0	5
6698628	24.2273	-0.0502273	8	1	5
6698628	24.2273	-0.0502273	9	1	5
6698628	24.2273	-0.0502273	10	1	5
6698628	24.2273	-0.0502273	11	1	4
6698628	24.2273	-0.0502273	12	1	5
6698628	24.2273	-0.0502273	13	1	5
6698628	24.2273	-0.0502273	14	1	5
6698628	24.2273	-0.0502273	15	1	5
6698628	24.2273	-0.0502273	16	1	5
6698628	24.2273	-0.0502273	17	1	5
6698628	24.2273	-0.0502273	18	1	5
6698628	24.2273	-0.0502273	19	1	5
6698628	24.2273	-0.0502273	20	1	5
6698628	24.2273	-0.0502273	21	0	5
6698628	24.2273	-0.0502273	22	1	5
6698628	24.2273	-0.0502273	23	1	5
6698628	24.2273	-0.0502273	24	0	5
6698628	24.2273	-0.0502273	25	0	5
6698628	24.2273	-0.0502273	26	0	5
6698628	24.2273	-0.0502273	27	0	5
6698628	24.2273	-0.0502273	28	1	5
6698628	24.2273	-0.0502273	29	1	5
6698628	24.2273	-0.0502273	30	1	5
6698628	24.2273	-0.0502273	31	0	5
6698628	24.2273	-0.0502273	32	1	5
6698628	24.2273	-0.0502273	33	1	4
6698628	24.2273	-0.0502273	34	0	5
6698628	24.2273	-0.0502273	35	1	5
6698628	24.2273	-0.0502273	36	1	5
6698628	24.2273	-0.0502273	37	1	5
6698628	24.2273	-0.0502273	38	1	5
6698628	24.2273	-0.0502273	39	0	5
6698628	24.2273	-0.0502273	40	0	5
6698628	24.2273	-0.0502273	41	1	5
6698628	24.2273	-0.0502273	42	1	5
6698628	24.2273	-0.0502273	43	1	5
6698628	24.2273	-0.0502273	44	0	5
6698628	24.2273	-0.0502273	45	0	5
6698628	24.2273	-0.0502273	46	0	5
6698628	24.2273	-0.0502273	47	1	5
6698628	24.2273	-0.0502273	48	0	5
6698628	24.2273	-0.0502273	49	1	5
6698628	24.2273	-0.0502273	50	1	4
6698628	24.2273	-0.0502273	51	1	5
6698628	24.2273	-0.0502273	52	1	5
6698628	24.2273	-0.0502273	53	1	5
6698628	24.2273	-0.0502273	54	0	5
6698628	24.2273	-0.0502273	55	0	5
6698628	24.2273	-0.0502273	56	1	5
6698628	24.2273	-0.0502273	57	1	3
6698628	24.2273	-0.0502273	58	0	4
6698628	24.2273	-0.0502273	59	1	5
6698628	24.2273	-0.0502273	60	1	5
6698628	24.2273	-0.0502273	61	0	3
6698628	24.2273	-0.0502273	62	1	5
6698628	24.2273	-0.0502273	63	1	0
6698628	24.2273	-0.0502273	64	1	5
6698628	24.2273	-0.0502273	65	1	3
6698628	24.2273	-0.0502273	66	1	3
6698628	24.2273	-0.0502273	67	1	0
6698628	24.2273	-0.0502273	68	1	5
6698628	24.2273	-0.0502273	69	1	3
6698628	24.2273	-0.0502273	70	1	5
6698628	24.2273	-0.0502273	71	1	3
6698628	24.2273	-0.0502273	72	1	5
6698628	24.2273	-0.0502273	73	1	5
6698628	24.2273	-0.0502273	74	1	5
6698628	24.2273	-0.0502273	75	1	5
6698628	24.2273	-0.0502273	76	1	2
6698628	24.2273	-0.0502273	77	1	5
6698628	24.2273	-0.0502273	78	0	5
6698628	24.2273	-0.0502273	79	1	5
6698628	24.2273	-0.0502273	80	1	5
6698628	24.2273	-0.0502273	81	1	5
6698628	24.2273	-0.0502273	82	1	5
6698628	24.2273	-0.0502273	83	1	5
6698628	24.2273	-0.0502273	84	0	5
6698666	8.22727	-0.0252273	1	0	3
6698666	8.22727	-0.0252273	2	0	1
6698666	8.22727	-0.0252273	3	0	3
6698666	8.22727	-0.0252273	4	1	3
6698666	8.22727	-0.0252273	5	0	2
6698666	8.22727	-0.0252273	6	0	3
6698666	8.22727	-0.0252273	7	0	3
6698666	8.22727	-0.0252273	8	0	2
6698666	8.22727	-0.0252273	9	0	4
6698666	8.22727	-0.0252273	10	0	3
6698666	8.22727	-0.0252273	11	0	3
6698666	8.22727	-0.0252273	12	0	1
6698666	8.22727	-0.0252273	13	0	2
6698666	8.22727	-0.0252273	14	0	3
6698666	8.22727	-0.0252273	15	0	4
6698666	8.22727	-0.0252273	16	0	3
6698666	8.22727	-0.0252273	17	1	4
6698666	8.22727	-0.0252273	18	0	3
6698666	8.22727	-0.0252273	19	0	3
6698666	8.22727	-0.0252273	20	1	4
6698666	8.22727	-0.0252273	21	0	4
6698666	8.22727	-0.0252273	22	1	4
6698666	8.22727	-0.0252273	23	0	4
6698666	8.22727	-0.0252273	24	1	3
6698666	8.22727	-0.0252273	25	0	4
6698666	8.22727	-0.0252273	26	0	1
6698666	8.22727	-0.0252273	27	0	4
6698666	8.22727	-0.0252273	28	0	3
6698666	8.22727	-0.0252273	29	0	3
6698666	8.22727	-0.0252273	30	0	3
6698666	8.22727	-0.0252273	31	0	3
6698666	8.22727	-0.0252273	32	1	3
6698666	8.22727	-0.0252273	33	0	2
6698666	8.22727	-0.0252273	34	1	4
6698666	8.22727	-0.0252273	35	0	2
6698666	8.22727	-0.0252273	36	0	3
6698666	8.22727	-0.0252273	37	1	3
6698666	8.22727	-0.0252273	38	0	2
6698666	8.22727	-0.0252273	39	0	3
6698666	8.22727	-0.0252273	40	1	4
6698666	8.22727	-0.0252273	41	1	2
6698666	8.22727	-0.0252273	42	0	2
6698666	8.22727	-0.0252273	43	0	4
6698666	8.22727	-0.0252273	44	0	5
6698666	8.22727	-0.0252273	45	1	3
6698666	8.22727	-0.0252273	46	0	3
6698666	8.22727	-0.0252273	47	1	3
6698666	8.22727	-0.0252273	48	0	4
6698666	8.22727	-0.0252273	49	1	3
6698666	8.22727	-0.0252273	50	1	3
6698666	8.22727	-0.0252273	51	0	3
6698666	8.22727	-0.0252273	52	0	3
6698666	8.22727	-0.0252273	53	1	2
6698666	8.22727	-0.0252273	54	1	2
6698666	8.22727	-0.0252273	55	0	4
6698666	8.22727	-0.0252273	56	1	4
6698666	8.22727	-0.0252273	57	1	1
6698666	8.22727	-0.0252273	58	1	3
6698666	8.22727	-0.0252273	59	1	3
6698666	8.22727	-0.0252273	60	1	4
6698666	8.22727	-0.0252273	61	0	4
6698666	8.22727	-0.0252273	62	0	4
6698666	8.22727	-0.0252273	63	1	2
6698666	8.22727	-0.0252273	64	1	4
6698666	8.22727	-0.0252273	65	1	3
6698666	8.22727	-0.0252273	66	1	4
6698666	8.22727	-0.0252273	67	1	4
6698666	8.22727	-0.0252273	68	1	2
6698666	8.22727	-0.0252273	69	1	2
6698666	8.22727	-0.0252273	70	1	4
6698666	8.22727	-0.0252273	71	0	4
6698666	8.22727	-0.0252273	72	1	3
6698666	8.22727	-0.0252273	73	1	3
6698666	8.22727	-0.0252273	74	1	2
6698666	8.22727	-0.0252273	75	1	3
6698666	8.22727	-0.0252273	76	1	1
6698666	8.22727	-0.0252273	77	1	2
6698666	8.22727	-0.0252273	78	1	2
6698666	8.22727	-0.0252273	79	1	3
6698666	8.22727	-0.0252273	80	1	2
6698666	8.22727	-0.0252273	81	1	3
6698666	8.22727	-0.0252273	82	1	3
6698666	8.22727	-0.0252273	83	1	2
6698666	8.22727	-0.0252273	84	1	4
6698715	9.22727	-0.150227	1	1	2
6698715	9.22727	-0.150227	2	0	2
6698715	9.22727	-0.150227	3	0	4
6698715	9.22727	-0.150227	4	1	4
6698715	9.22727	-0.150227	5	0	4
6698715	9.22727	-0.150227	6	1	3
6698715	9.22727	-0.150227	7	0	2
6698715	9.22727	-0.150227	8	1	3
6698715	9.22727	-0.150227	9	1	2
6698715	9.22727	-0.150227	10	1	3
6698715	9.22727	-0.150227	11	0	2
6698715	9.22727	-0.150227	12	1	3
6698715	9.22727	-0.150227	13	1	4
6698715	9.22727	-0.150227	14	0	3
6698715	9.22727	-0.150227	15	1	3
6698715	9.22727	-0.150227	16	0	3
6698715	9.22727	-0.150227	17	1	2
6698715	9.22727	-0.150227	18	0	3
6698715	9.22727	-0.150227	19	1	4
6698715	9.22727	-0.150227	20	1	2
6698715	9.22727	-0.150227	21	0	2
6698715	9.22727	-0.150227	22	0	2
6698715	9.22727	-0.150227	23	1	2
6698715	9.22727	-0.150227	24	0	3
6698715	9.22727	-0.150227	25	1	2
6698715	9.22727	-0.150227	26	0	1
6698715	9.22727	-0.150227	27	1	3
6698715	9.22727	-0.150227	28	1	3
6698715	9.22727	-0.150227	29	1	2
6698715	9.22727	-0.150227	30	1	3
6698715	9.22727	-0.150227	31	0	2
6698715	9.22727	-0.150227	32	1	1
6698715	9.22727	-0.150227	33	0	4
6698715	9.22727	-0.150227	34	0	2
6698715	9.22727	-0.150227	35	0	1
6698715	9.22727	-0.150227	36	0	4
6698715	9.22727	-0.150227	37	1	2
6698715	9.22727	-0.150227	38	0	1
6698715	9.22727	-0.150227	39	0	2
6698715	9.22727	-0.150227	40	0	3
6698715	9.22727	-0.150227	41	1	3
6698715	9.22727	-0.150227	42	1	3
6698715	9.22727	-0.150227	43	0	4
6698715	9.22727	-0.150227	44	1	2
6698715	9.22727	-0.150227	45	1	3
6698715	9.22727	-0.150227	46	1	2
6698715	9.22727	-0.150227	47	0	2
6698715	9.22727	-0.150227	48	0	2
6698715	9.22727	-0.150227	49	1	2
6698715	9.22727	-0.150227	50	1	2
6698715	9.22727	-0.150227	51	1	2
6698715	9.22727	-0.150227	52	0	3
6698715	9.22727	-0.150227	53	1	3
6698715	9.22727	-0.150227	54	1	4
6698715	9.22727	-0.150227	55	0	2
6698715	9.22727	-0.150227	56	1	3
6698715	9.22727	-0.150227	57	1	4
6698715	9.22727	-0.150227	58	1	3
6698715	9.22727	-0.150227	59	0	0
6698715	9.22727	-0.150227	60	0	3
6698715	9.22727	-0.150227	61	0	2
6698715	9.22727	-0.150227	62	1	2
6698715	9.22727	-0.150227	63	0	4
6698715	9.22727	-0.150227	64	1	3
6698715	9.22727	-0.150227	65	1	2
6698715	9.22727	-0.150227	66	1	4
6698715	9.22727	-0.150227	67	1	2
6698715	9.22727	-0.150227	68	1	2
6698715	9.22727	-0.150227	69	1	2
6698715	9.22727	-0.150227	70	0	2
6698715	9.22727	-0.150227	71	0	2
6698715	9.22727	-0.150227	72	1	2
6698715	9.22727	-0.150227	73	1	2
6698715	9.22727	-0.150227	74	1	2
6698715	9.22727	-0.150227	75	1	1
6698715	9.22727	-0.150227	76	1	3
6698715	9.22727	-0.150227	77	1	3
6698715	9.22727	-0.150227	78	1	2
6698715	9.22727	-0.150227	79	1	2
6698715	9.22727	-0.150227	80	1	2
6698715	9.22727	-0.150227	81	1	3
6698715	9.22727	-0.150227	82	1	3
6698715	9.22727	-0.150227	83	0	2
6698715	9.22727	-0.150227	84	1	3
6700003	15.2273	-0.000227273	1	1	4
6700003	15.2273	-0.000227273	2	1	1
6700003	15.2273	-0.000227273	3	0	2
6700003	15.2273	-0.000227273	4	1	3
6700003	15.2273	-0.000227273	5	0	0
6700003	15.2273	-0.000227273	6	1	2
6700003	15.2273	-0.000227273	7	0	1
6700003	15.2273	-0.000227273	8	0	4
6700003	15.2273	-0.000227273	9	1	5
6700003	15.2273	-0.000227273	10	1	1
6700003	15.2273	-0.000227273	11	1	3
6700003	15.2273	-0.000227273	12	1	4
6700003	15.2273	-0.000227273	13	0	4
6700003	15.2273	-0.000227273	14	0	3
6700003	15.2273	-0.000227273	15	1	5
6700003	15.2273	-0.000227273	16	1	4
6700003	15.2273	-0.000227273	17	1	5
6700003	15.2273	-0.000227273	18	0	1
6700003	15.2273	-0.000227273	19	1	4
6700003	15.2273	-0.000227273	20	0	1
6700003	15.2273	-0.000227273	21	0	3
6700003	15.2273	-0.000227273	22	0	2
6700003	15.2273	-0.000227273	23	1	5
6700003	15.2273	-0.000227273	24	1	2
6700003	15.2273	-0.000227273	25	0	4
6700003	15.2273	-0.000227273	26	1	3
6700003	15.2273	-0.000227273	27	1	3
6700003	15.2273	-0.000227273	28	1	2
6700003	15.2273	-0.000227273	29	1	3
6700003	15.2273	-0.000227273	30	1	4
6700003	15.2273	-0.000227273	31	1	3
6700003	15.2273	-0.000227273	32	1	4
6700003	15.2273	-0.000227273	33	0	4
6700003	15.2273	-0.000227273	34	1	2
6700003	15.2273	-0.000227273	35	1	5
6700003	15.2273	-0.000227273	36	1	1
6700003	15.2273	-0.000227273	37	1	3
6700003	15.2273	-0.000227273	38	1	4
6700003	15.2273	-0.000227273	39	1	4
6700003	15.2273	-0.000227273	40	1	3
6700003	15.2273	-0.000227273	41	1	4
6700003	15.2273	-0.000227273	42	1	1
6700003	15.2273	-0.000227273	43	0	1
6700003	15.2273	-0.000227273	44	0	3
6700003	15.2273	-0.000227273	45	1	1
6700003	15.2273	-0.000227273	46	0	3
6700003	15.2273	-0.000227273	47	1	4
6700003	15.2273	-0.000227273	48	0	4
6700003	15.2273	-0.000227273	49	1	3
6700003	15.2273	-0.000227273	50	1	3
6700003	15.2273	-0.000227273	51	0	3
6700003	15.2273	-0.000227273	52	0	3
6700003	15.2273	-0.000227273	53	0	0
6700003	15.2273	-0.000227273	54	0	2
6700003	15.2273	-0.000227273	55	0	3
6700003	15.2273	-0.000227273	56	1	4
6700003	15.2273	-0.000227273	57	1	4
6700003	15.2273	-0.000227273	58	1	2
6700003	15.2273	-0.000227273	59	1	4
6700003	15.2273	-0.000227273	60	0	2
6700003	15.2273	-0.000227273	61	1	2
6700003	15.2273	-0.000227273	62	1	1
6700003	15.2273	-0.000227273	63	1	4
6700003	15.2273	-0.000227273	64	1	2
6700003	15.2273	-0.000227273	65	1	5
6700003	15.2273	-0.000227273	66	1	0
6700003	15.2273	-0.000227273	67	1	1
6700003	15.2273	-0.000227273	68	0	1
6700003	15.2273	-0.000227273	69	1	3
6700003	15.2273	-0.000227273	70	1	5
6700003	15.2273	-0.000227273	71	1	4
6700003	15.2273	-0.000227273	72	0	1
6700003	15.2273	-0.000227273	73	1	2
6700003	15.2273	-0.000227273	74	0	4
6700003	15.2273	-0.000227273	75	1	2
6700003	15.2273	-0.000227273	76	0	2
6700003	15.2273	-0.000227273	77	1	3
6700003	15.2273	-0.000227273	78	1	1
6700003	15.2273	-0.000227273	79	1	2
6700003	15.2273	-0.000227273	80	1	3
6700003	15.2273	-0.000227273	81	1	1
6700003	15.2273	-0.000227273	82	1	4
6700003	15.2273	-0.000227273	83	1	3
6700003	15.2273	-0.000227273	84	0	1
6700019	-11.7727	0.0997727	1	1	5
6700019	-11.7727	0.0997727	2	0	5
6700019	-11.7727	0.0997727	3	0	4
6700019	-11.7727	0.0997727	4	1	3
6700019	-11.7727	0.0997727	5	1	4
6700019	-11.7727	0.0997727	6	0	2
6700019	-11.7727	0.0997727	7	1	3
6700019	-11.7727	0.0997727	8	1	3
6700019	-11.7727	0.0997727	9	1	5
6700019	-11.7727	0.0997727	10	1	4
6700019	-11.7727	0.0997727	11	0	3
6700019	-11.7727	0.0997727	12	1	3
6700019	-11.7727	0.0997727	13	1	2
6700019	-11.7727	0.0997727	14	1	4
6700019	-11.7727	0.0997727	15	1	3
6700019	-11.7727	0.0997727	16	1	3
6700019	-11.7727	0.0997727	17	1	4
6700019	-11.7727	0.0997727	18	0	1
6700019	-11.7727	0.0997727	19	1	5
6700019	-11.7727	0.0997727	20	1	4
6700019	-11.7727	0.0997727	21	1	3
6700019	-11.7727	0.0997727	22	1	4
6700019	-11.7727	0.0997727	23	0	2
6700019	-11.7727	0.0997727	24	0	2
6700019	-11.7727	0.0997727	25	0	3
6700019	-11.7727	0.0997727	26	0	2
6700019	-11.7727	0.0997727	27	1	3
6700019	-11.7727	0.0997727	28	1	2
6700019	-11.7727	0.0997727	29	1	3
6700019	-11.7727	0.0997727	30	1	5
6700019	-11.7727	0.0997727	31	1	2
6700019	-11.7727	0.0997727	32	1	4
6700019	-11.7727	0.0997727	33	1	3
6700019	-11.7727	0.0997727	34	1	3
6700019	-11.7727	0.0997727	35	1	2
6700019	-11.7727	0.0997727	36	1	4
6700019	-11.7727	0.0997727	37	1	4
6700019	-11.7727	0.0997727	38	1	4
6700019	-11.7727	0.0997727	39	1	2
6700019	-11.7727	0.0997727	40	1	4
6700019	-11.7727	0.0997727	41	1	2
6700019	-11.7727	0.0997727	42	1	4
6700019	-11.7727	0.0997727	43	1	3
6700019	-11.7727	0.0997727	44	1	3
6700019	-11.7727	0.0997727	45	0	3
6700019	-11.7727	0.0997727	46	1	3
6700019	-11.7727	0.0997727	47	1	4
6700019	-11.7727	0.0997727	48	1	3
6700019	-11.7727	0.0997727	49	1	4
6700019	-11.7727	0.0997727	50	0	3
6700019	-11.7727	0.0997727	51	1	2
6700019	-11.7727	0.0997727	52	1	3
6700019	-11.7727	0.0997727	53	1	2
6700019	-11.7727	0.0997727	54	1	3
6700019	-11.7727	0.0997727	55	0	5
6700019	-11.7727	0.0997727	56	1	3
6700019	-11.7727	0.0997727	57	1	3
6700019	-11.7727	0.0997727	58	1	3
6700019	-11.7727	0.0997727	59	1	3
6700019	-11.7727	0.0997727	60	1	2
6700019	-11.7727	0.0997727	61	1	2
6700019	-11.7727	0.0997727	62	1	3
6700019	-11.7727	0.0997727	63	0	2
6700019	-11.7727	0.0997727	64	1	3
6700019	-11.7727	0.0997727	65	1	2
6700019	-11.7727	0.0997727	66	1	2
6700019	-11.7727	0.0997727	67	1	4
6700019	-11.7727	0.0997727	68	1	5
6700019	-11.7727	0.0997727	69	1	3
6700019	-11.7727	0.0997727	70	1	3
6700019	-11.7727	0.0997727	71	1	4
6700019	-11.7727	0.0997727	72	0	2
6700019	-11.7727	0.0997727	73	1	3
6700019	-11.7727	0.0997727	74	0	4
6700019	-11.7727	0.0997727	75	1	3
6700019	-11.7727	0.0997727	76	0	2
6700019	-11.7727	0.0997727	77	1	3
6700019	-11.7727	0.0997727	78	1	3
6700019	-11.7727	0.0997727	79	1	4
6700019	-11.7727	0.0997727	80	0	2
6700019	-11.7727	0.0997727	81	0	3
6700019	-11.7727	0.0997727	82	1	2
6700019	-11.7727	0.0997727	83	1	2
6700019	-11.7727	0.0997727	84	0	2
6700025	14.2273	0.0747727	1	0	4
6700025	14.2273	0.0747727	2	1	3
6700025	14.2273	0.0747727	3	0	3
6700025	14.2273	0.0747727	4	0	5
6700025	14.2273	0.0747727	5	0	4
6700025	14.2273	0.0747727	6	0	3
6700025	14.2273	0.0747727	7	0	4
6700025	14.2273	0.0747727	8	1	3
6700025	14.2273	0.0747727	9	1	5
6700025	14.2273	0.0747727	10	1	4
6700025	14.2273	0.0747727	11	1	3
6700025	14.2273	0.0747727	12	1	3
6700025	14.2273	0.0747727	13	1	3
6700025	14.2273	0.0747727	14	1	3
6700025	14.2273	0.0747727	15	1	4
6700025	14.2273	0.0747727	16	1	3
6700025	14.2273	0.0747727	17	1	5
6700025	14.2273	0.0747727	18	0	3
6700025	14.2273	0.0747727	19	0	4
6700025	14.2273	0.0747727	20	1	3
6700025	14.2273	0.0747727	21	1	2
6700025	14.2273	0.0747727	22	0	2
6700025	14.2273	0.0747727	23	1	0
6700025	14.2273	0.0747727	24	0	4
6700025	14.2273	0.0747727	25	0	3
6700025	14.2273	0.0747727	26	1	3
6700025	14.2273	0.0747727	27	1	3
6700025	14.2273	0.0747727	28	1	3
6700025	14.2273	0.0747727	29	1	3
6700025	14.2273	0.0747727	30	1	2
6700025	14.2273	0.0747727	31	0	2
6700025	14.2273	0.0747727	32	0	3
6700025	14.2273	0.0747727	33	0	3
6700025	14.2273	0.0747727	34	1	3
6700025	14.2273	0.0747727	35	0	3
6700025	14.2273	0.0747727	36	1	3
6700025	14.2273	0.0747727	37	1	4
6700025	14.2273	0.0747727	38	0	4
6700025	14.2273	0.0747727	39	1	3
6700025	14.2273	0.0747727	40	1	4
6700025	14.2273	0.0747727	41	1	2
6700025	14.2273	0.0747727	42	1	4
6700025	14.2273	0.0747727	43	0	3
6700025	14.2273	0.0747727	44	0	4
6700025	14.2273	0.0747727	45	1	3
6700025	14.2273	0.0747727	46	1	4
6700025	14.2273	0.0747727	47	0	4
6700025	14.2273	0.0747727	48	1	3
6700025	14.2273	0.0747727	49	1	2
6700025	14.2273	0.0747727	50	1	4
6700025	14.2273	0.0747727	51	0	4
6700025	14.2273	0.0747727	52	0	4
6700025	14.2273	0.0747727	53	1	3
6700025	14.2273	0.0747727	54	1	1
6700025	14.2273	0.0747727	55	0	3
6700025	14.2273	0.0747727	56	0	4
6700025	14.2273	0.0747727	57	0	3
6700025	14.2273	0.0747727	58	1	3
6700025	14.2273	0.0747727	59	1	3
6700025	14.2273	0.0747727	60	1	4
6700025	14.2273	0.0747727	61	1	3
6700025	14.2273	0.0747727	62	1	2
6700025	14.2273	0.0747727	63	0	4
6700025	14.2273	0.0747727	64	1	4
6700025	14.2273	0.0747727	65	1	3
6700025	14.2273	0.0747727	66	1	3
6700025	14.2273	0.0747727	67	1	5
6700025	14.2273	0.0747727	68	1	4
6700025	14.2273	0.0747727	69	1	3
6700025	14.2273	0.0747727	70	1	3
6700025	14.2273	0.0747727	71	1	2
6700025	14.2273	0.0747727	72	1	3
6700025	14.2273	0.0747727	73	1	3
6700025	14.2273	0.0747727	74	1	3
6700025	14.2273	0.0747727	75	1	3
6700025	14.2273	0.0747727	76	1	3
6700025	14.2273	0.0747727	77	1	4
6700025	14.2273	0.0747727	78	1	3
6700025	14.2273	0.0747727	79	0	3
6700025	14.2273	0.0747727	80	1	3
6700025	14.2273	0.0747727	81	1	2
6700025	14.2273	0.0747727	82	1	2
6700025	14.2273	0.0747727	83	1	4
6700025	14.2273	0.0747727	84	0	4
6700043	18.2273	-0.200227	1	1	4
6700043	18.2273	-0.200227	2	1	4
6700043	18.2273	-0.200227	3	1	4
6700043	18.2273	-0.200227	4	1	5
6700043	18.2273	-0.200227	5	1	4
6700043	18.2273	-0.200227	6	1	4
6700043	18.2273	-0.200227	7	1	3
6700043	18.2273	-0.200227	8	1	3
6700043	18.2273	-0.200227	9	0	2
6700043	18.2273	-0.200227	10	1	5
6700043	18.2273	-0.200227	11	1	5
6700043	18.2273	-0.200227	12	1	5
6700043	18.2273	-0.200227	13	1	5
6700043	18.2273	-0.200227	14	1	4
6700043	18.2273	-0.200227	15	1	2
6700043	18.2273	-0.200227	16	1	3
6700043	18.2273	-0.200227	17	1	4
6700043	18.2273	-0.200227	18	1	4
6700043	18.2273	-0.200227	19	1	4
6700043	18.2273	-0.200227	20	1	5
6700043	18.2273	-0.200227	21	0	4
6700043	18.2273	-0.200227	22	0	4
6700043	18.2273	-0.200227	23	1	4
6700043	18.2273	-0.200227	24	1	4
6700043	18.2273	-0.200227	25	0	4
6700043	18.2273	-0.200227	26	1	4
6700043	18.2273	-0.200227	27	1	4
6700043	18.2273	-0.200227	28	0	4
6700043	18.2273	-0.200227	29	0	3
6700043	18.2273	-0.200227	30	1	4
6700043	18.2273	-0.200227	31	0	3
6700043	18.2273	-0.200227	32	1	5
6700043	18.2273	-0.200227	33	0	5
6700043	18.2273	-0.200227	34	1	5
6700043	18.2273	-0.200227	35	0	3
6700043	18.2273	-0.200227	36	0	5
6700043	18.2273	-0.200227	37	1	5
6700043	18.2273	-0.200227	38	1	4
6700043	18.2273	-0.200227	39	1	5
6700043	18.2273	-0.200227	40	1	4
6700043	18.2273	-0.200227	41	1	4
6700043	18.2273	-0.200227	42	1	4
6700043	18.2273	-0.200227	43	0	4
6700043	18.2273	-0.200227	44	0	3
6700043	18.2273	-0.200227	45	1	4
6700043	18.2273	-0.200227	46	0	5
6700043	18.2273	-0.200227	47	1	4
6700043	18.2273	-0.200227	48	1	3
6700043	18.2273	-0.200227	49	1	4
6700043	18.2273	-0.200227	50	1	4
6700043	18.2273	-0.200227	51	0	5
6700043	18.2273	-0.200227	52	1	4
6700043	18.2273	-0.200227	53	1	3
6700043	18.2273	-0.200227	54	0	4
6700043	18.2273	-0.200227	55	0	4
6700043	18.2273	-0.200227	56	1	4
6700043	18.2273	-0.200227	57	1	5
6700043	18.2273	-0.200227	58	0	3
6700043	18.2273	-0.200227	59	1	4
6700043	18.2273	-0.200227	60	1	5
6700043	18.2273	-0.200227	61	1	4
6700043	18.2273	-0.200227	62	1	4
6700043	18.2273	-0.200227	63	0	4
6700043	18.2273	-0.200227	64	1	4
6700043	18.2273	-0.200227	65	0	4
6700043	18.2273	-0.200227	66	1	3
6700043	18.2273	-0.200227	67	1	4
6700043	18.2273	-0.200227	68	0	2
6700043	18.2273	-0.200227	69	1	5
6700043	18.2273	-0.200227	70	1	4
6700043	18.2273	-0.200227	71	1	4
6700043	18.2273	-0.200227	72	0	4
6700043	18.2273	-0.200227	73	1	4
6700043	18.2273	-0.200227	74	1	4
6700043	18.2273	-0.200227	75	0	4
6700043	18.2273	-0.200227	76	1	4
6700043	18.2273	-0.200227	77	1	3
6700043	18.2273	-0.200227	78	1	4
6700043	18.2273	-0.200227	79	1	5
6700043	18.2273	-0.200227	80	0	5
6700043	18.2273	-0.200227	81	1	5
6700043	18.2273	-0.200227	82	0	5
6700043	18.2273	-0.200227	83	1	3
6700043	18.2273	-0.200227	84	1	5
6701525	-7.77273	0.0747727	1	1	5
6701525	-7.77273	0.0747727	2	1	3
6701525	-7.77273	0.0747727	3	0	4
6701525	-7.77273	0.0747727	4	1	4
6701525	-7.77273	0.0747727	5	1	4
6701525	-7.77273	0.0747727	6	0	3
6701525	-7.77273	0.0747727	7	0	5
6701525	-7.77273	0.0747727	8	0	3
6701525	-7.77273	0.0747727	9	1	3
6701525	-7.77273	0.0747727	10	1	0
6701525	-7.77273	0.0747727	11	1	4
6701525	-7.77273	0.0747727	12	1	3
6701525	-7.77273	0.0747727	13	0	3
6701525	-7.77273	0.0747727	14	1	4
6701525	-7.77273	0.0747727	15	0	2
6701525	-7.77273	0.0747727	16	1	1
6701525	-7.77273	0.0747727	17	1	4
6701525	-7.77273	0.0747727	18	0	2
6701525	-7.77273	0.0747727	19	1	4
6701525	-7.77273	0.0747727	20	1	4
6701525	-7.77273	0.0747727	21	1	4
6701525	-7.77273	0.0747727	22	1	3
6701525	-7.77273	0.0747727	23	1	4
6701525	-7.77273	0.0747727	24	0	3
6701525	-7.77273	0.0747727	25	0	2
6701525	-7.77273	0.0747727	26	0	3
6701525	-7.77273	0.0747727	27	1	3
6701525	-7.77273	0.0747727	28	0	1
6701525	-7.77273	0.0747727	29	1	4
6701525	-7.77273	0.0747727	30	1	3
6701525	-7.77273	0.0747727	31	1	3
6701525	-7.77273	0.0747727	32	1	4
6701525	-7.77273	0.0747727	33	1	3
6701525	-7.77273	0.0747727	34	1	4
6701525	-7.77273	0.0747727	35	1	3
6701525	-7.77273	0.0747727	36	1	3
6701525	-7.77273	0.0747727	37	1	3
6701525	-7.77273	0.0747727	38	1	4
6701525	-7.77273	0.0747727	39	1	3
6701525	-7.77273	0.0747727	40	1	4
6701525	-7.77273	0.0747727	41	1	4
6701525	-7.77273	0.0747727	42	0	4
6701525	-7.77273	0.0747727	43	1	4
6701525	-7.77273	0.0747727	44	1	3
6701525	-7.77273	0.0747727	45	1	5
6701525	-7.77273	0.0747727	46	1	3
6701525	-7.77273	0.0747727	47	1	4
6701525	-7.77273	0.0747727	48	1	2
6701525	-7.77273	0.0747727	49	1	5
6701525	-7.77273	0.0747727	50	1	5
6701525	-7.77273	0.0747727	51	1	3
6701525	-7.77273	0.0747727	52	1	3
6701525	-7.77273	0.0747727	53	1	4
6701525	-7.77273	0.0747727	54	1	4
6701525	-7.77273	0.0747727	55	0	4
6701525	-7.77273	0.0747727	56	1	3
6701525	-7.77273	0.0747727	57	1	2
6701525	-7.77273	0.0747727	58	1	2
6701525	-7.77273	0.0747727	59	1	3
6701525	-7.77273	0.0747727	60	1	3
6701525	-7.77273	0.0747727	61	1	3
6701525	-7.77273	0.0747727	62	1	4
6701525	-7.77273	0.0747727	63	1	3
6701525	-7.77273	0.0747727	64	1	5
6701525	-7.77273	0.0747727	65	1	4
6701525	-7.77273	0.0747727	66	1	4
6701525	-7.77273	0.0747727	67	1	5
[truncated: 16,481 more rows]
